# Supplementary material for: Palladium/norbornene/copper-catalysed intermolecular thio-esterification from ketones: modular access towards tetrasubstituted vinyl sulfides
Source: Royal Society of Chemistry journal article supplement (doi:10.1039/d3qo01484c), 2023-01-01
Supplement: d3qo01484c1.pdf [file d3qo01484c1.pdf]

## Supporting Information

### **Palladium/norbornene/copper-catalysed intermolecular thioesterification from ketones: modular access towards tetrasubstituted vinyl sulfides**

Guopeng Du, Yu Zhao, Pingliang Zhu, Shaowen Ling, Baolong Xu, Hui Liu, Xinjin Li and Feng-Gang Sun\*

School of Chemistry and Chemical Engineering, Shandong University of Technology,  
266 West Xincun Road, Zibo 255049

#### **Table of Contents**

|                                                                                     |     |
|-------------------------------------------------------------------------------------|-----|
| 1. General Information .....                                                        | S2  |
| 2. Preparation and Characterization Data of Alkenyl Triflates .....                 | S2  |
| 3. Preparation and Characterization Data of Thiocarbonate.....                      | S3  |
| 4. Optimization of Reaction Conditions .....                                        | S5  |
| Table 1. Screening of Additive.....                                                 | S5  |
| Table 2. Screening of [NBE] .....                                                   | S6  |
| Table 3. Screening of [Pd].....                                                     | S6  |
| Table 4. Screening of Ligand .....                                                  | S7  |
| Table 5. Screening of Base.....                                                     | S7  |
| Table 6. Screening of Solvent .....                                                 | S8  |
| Table 7. Screening of Temperature .....                                             | S8  |
| 5. Synthesis and Characterization of Compound 3.....                                | S8  |
| 6. Scale-up Reaction .....                                                          | S24 |
| 7. Synthetic Transformation .....                                                   | S24 |
| 8. One-Pot Triflation/Thioesterification from Ketone.....                           | S26 |
| 9. Thioesterification of Alkenes by Alkenyl Iodides.....                            | S27 |
| 10. Investigation of Reaction Mechanism .....                                       | S27 |
| 11. Copies of <sup>1</sup> H, <sup>13</sup> C, and <sup>19</sup> F NMR Spectra..... | S29 |
| 12. References .....                                                                | S67 |

## 1. General Information

DCM, DMF, DMSO, toluene and CH<sub>3</sub>CN solvents were dried from CaH<sub>2</sub> and purified by distillation before being used. Purifications of reactions products were carried out by column chromatography on silica gel (200-300 mesh) using a mixture of petroleum ether (60-90°C), dichloromethane and ethyl acetate as eluent. <sup>1</sup>H NMR (400 MHz), <sup>13</sup>C NMR (100 MHz) and <sup>19</sup>F NMR (376 MHz) were measured on a Bruker Avance 400 MHz spectrometer. Chemical shifts (δ) were reported in ppm relative to the residual solvent signal (CDCl<sub>3</sub> δ = 7.26 for <sup>1</sup>H NMR and δ = 77.0 for <sup>13</sup>C NMR). Chemical shifts (ppm) were recorded with tetramethylsilane (TMS) as the internal reference standard. Multiplicities are given as s (singlet), d (doublet), t (triplet), dd (doublet of doublets), td (triplet of doublets) or m (multiplet). Electrospray mass spectra were obtained using Bruker micrOTOF-Q II 10410 Mass Spectrometer. Unless otherwise noted, all other commercially available reagents and solvents were used without further purification.

## 2. Preparation and Characterization Data of Alkenyl Triflates

### General Procedure 1

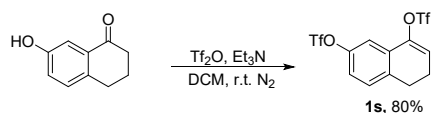

A mixture of ketone (1.0 equiv, 20 mmol), Et<sub>3</sub>N (3.0 equiv, 60 mmol) in anhydrous DCM (15 mL) dropwise for 10 minutes at room temperature into a mixture of Tf<sub>2</sub>O (4.0 equiv, 80 mmol) in anhydrous DCM (15 mL) under N<sub>2</sub>, the mixture was stirred at room temperature for 24 h. The mixture solution was diluted with DCM and washed with aqueous solution of NaHCO<sub>3</sub>, dried over anhydrous Na<sub>2</sub>SO<sub>4</sub> and concentrated in vacuo. The crude product was purified by column chromatography on silica gel to afford the product **1s** (6816.0 mg, 80% yield).

Synthesis methods for other alkenyl triflates (**1t-1A**) have been reported.<sup>[1,2]</sup>

### 3,4-dihydronaphthalene-1,7-diyl bis(trifluoromethanesulfonate) (1s)

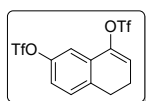

Compound **1s** was prepared from 7-hydroxy-3,4-dihydronaphthalen-1-yl trifluoromethanesulfonate and Tf<sub>2</sub>O according to general procedure 1. The resultant residue was purified by column chromatography on silica gel (PE) to afford **1s** as colorless oil (6816.0 mg, 80% yield).

<sup>1</sup>H NMR (400 MHz, CDCl<sub>3</sub>): δ 7.27 (d, *J* = 8.0 Hz, 1H), 7.24 - 7.15 (m, 2H), 6.18 (t, *J* = 6.0 Hz, 1H), 2.91 (t, *J* = 10.0 Hz, 2H), 2.56 (q, *J* = 8.0 Hz, 2H);

<sup>13</sup>C NMR (100 MHz, CDCl<sub>3</sub>): δ 148.4, 144.4, 136.4, 130.7, 129.5, 123.5 (q, *J* = 318.7 Hz), 123.3 (q, *J* = 318.7 Hz), 121.7, 120.4, 114.3, 26.1, 22.1;

<sup>19</sup>F NMR (376 MHz, CDCl<sub>3</sub>): δ -72.79 (s, 3F), -72.63 (s, 3F);

HRMS (ESI) calcd for C<sub>12</sub>H<sub>9</sub>F<sub>6</sub>O<sub>6</sub>S<sub>2</sub> [M+H]<sup>+</sup> 426.9739, found 426.9736.

## 3. Preparation and Characterization Data of Thiocarbonate

### General Procedure 2

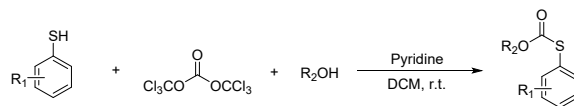

A stirred solution of thiophenol (5.0 mmol), alcohol (5.0 mmol), and pyridine (20.0 mmol) in dry CH<sub>2</sub>Cl<sub>2</sub> (25 mL) at room temperature, triphosgene (5.0 mmol) was added to the solution stirring at room temperature for 4 h. After completion of the reaction, the mixture was washed two times with aqueous HCl (1 M), the combine organic extracts were dried (Na<sub>2</sub>SO<sub>4</sub>) and concentrated in vacuo. The crude product was purified by column chromatography on silica gel to afford corresponding thiocarbonate (**2j-2l**).

Synthesis methods for other thiocarbonates (**2a-2i**, **2m-2u**) have been reported.<sup>[3,4]</sup>

### ***O*-(3,7-dimethyloct-6-en-1-yl) *S*-(*p*-tolyl) carbonothioate (**2j**)**

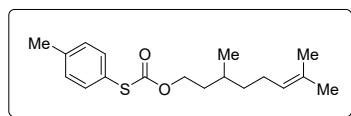

Compound **2j** was prepared from 4-methylbenzenethiol and 3,7-dimethyloct-6-en-1-ol according to general procedure 2. The resultant residue was purified by column chromatography on silica gel (PE) to afford **2j** as colorless oil (1378.2 mg, 90% yield).

<sup>1</sup>H NMR (400 MHz, CDCl<sub>3</sub>): δ 7.44 - 7.16 (m, 5H), 5.08 (t, *J* = 8.0 Hz, 1H), 4.25 (t, *J* = 8.0 Hz, 2H), 2.36 (s, 3H), 2.06 – 1.90 (m, 2H), 1.69 (s, 3H), 1.60 (s, 3H), 1.55 – 1.25 (m, 4H), 1.20 – 1.12 (m, 1H), 0.90 (d, *J* = 8.0 Hz, 3H);

<sup>13</sup>C NMR (100 MHz, CDCl<sub>3</sub>): δ 170.0, 135.1, 134.8, 131.3, 129.9, 124.4, 123.6, 66.4, 36.8, 35.3, 29.2, 25.7, 25.3, 21.2, 19.3, 17.6;

HRMS (ESI) calcd for C<sub>18</sub>H<sub>27</sub>O<sub>2</sub>S [M+H]<sup>+</sup> 307.1726, found 307.1725.

### ***O*-(2-isopropyl-5-methylcyclohexyl) *S*-(*p*-tolyl) carbonothioate (**2k**)**

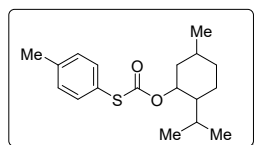

Compound **2k** was prepared from 4-methylbenzenethiol and 2-isopropyl-5-methylcyclohexan-1-ol according to general procedure 2. The resultant residue was purified by column chromatography on silica gel (PE) to afford **2k** as colorless oil (1254.8 mg, 82% yield).

<sup>1</sup>H NMR (400 MHz, CDCl<sub>3</sub>): δ 7.41 (d, *J* = 8.0 Hz, 2H), 7.19 (d, *J* = 8.0 Hz, 2H), 4.82 – 4.70 (m, 1H), 2.36 (s, 3H), 2.14 – 2.04 (m, 1H), 1.99 – 1.85 (m, 1H), 1.70 – 1.60 (m, 2H), 1.50 – 1.35 (m, 2H), 1.07 (q, *J* = 12.0 Hz, 2H), 0.94 – 0.84 (m, 7H), 0.78 (d, *J* = 8.0 Hz, 3H);

<sup>13</sup>C NMR (100 MHz, CDCl<sub>3</sub>): δ 169.4, 139.6, 134.8, 129.8, 124.5, 78.7, 47.0, 40.8, 34.0, 31.4, 26.2, 23.4, 21.9, 21.3, 20.6, 16.3;

HRMS (ESI) calcd for C<sub>18</sub>H<sub>27</sub>O<sub>2</sub>S [M+H]<sup>+</sup> 307.1726, found 307.1723.

## *O*-(2,2-dimethyl-3-(*m*-tolyl)propyl) *S*-(*p*-tolyl) carbonothioate (**21**)

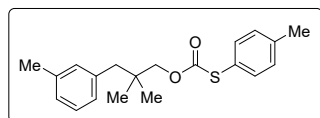

Compound **21** was prepared from 4-methylbenzenethiol and 2,2-dimethyl-3-(*m*-tolyl)propan-1-ol according to general procedure 2. The resultant residue was purified by column chromatography on silica gel (PE) to afford **21** as colorless oil (1394.6 mg, 85% yield).

<sup>1</sup>H NMR (400 MHz, CDCl<sub>3</sub>): δ 7.45 (d, *J* = 8.0 Hz, 2H), 7.39 (d, *J* = 12.0 Hz, 1H), 7.23 – 7.18 (m, 2H), 7.15 (t, *J* = 8.0 Hz, 1H), 7.02 (d, *J* = 4.0 Hz, 1H), 6.87 (s, 1H), 3.88 (s, 2H), 2.46 (s, 2H), 2.37 (s, 3H), 2.32 (s, 3H), 0.88 (s, 6H);

<sup>13</sup>C NMR (100 MHz, CDCl<sub>3</sub>): δ 169.9, 140.4, 139.9, 137.3, 135.0, 131.2, 129.9, 127.7, 126.8, 124.3, 123.6, 74.7, 44.5, 35.2, 24.1, 21.4, 21.3;

HRMS (ESI) calcd for C<sub>20</sub>H<sub>25</sub>O<sub>2</sub>S [M+H]<sup>+</sup> 329.1570, found 329.1573.

## 4. Optimization of Reaction Conditions

Table 1. Screening of Additive<sup>a</sup>

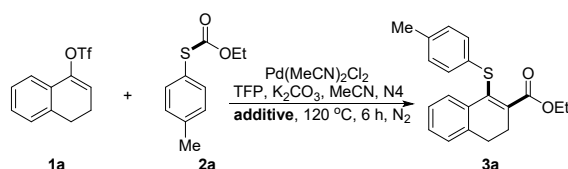

| Entry | additive (20 mol%) | Yield(%) |
|-------|--------------------|----------|
| 1     | -                  | 42       |
| 2     | CuCl               | 68       |
| 3     | CuI                | 64       |
| 4     | CuTC               | 52       |
| 5     | Cu <sub>2</sub> O  | 54       |
| 6     | MgCl <sub>2</sub>  | 35       |
| 7     | ZnCl <sub>2</sub>  | 40       |
| 8     | FeCl <sub>2</sub>  | 27       |
| 9     | CoCl <sub>2</sub>  | 25       |
| 10    | CuCl <sub>2</sub>  | 35       |

<sup>a</sup> Reaction conditions: substrate **1a** (0.2 mmol, 1.0 equiv), **2a** (0.3 mmol, 1.5 equiv), Pd(MeCN)<sub>2</sub>Cl<sub>2</sub> (0.02 mmol, 10 mol%), TFP (0.05 mmol, 25 mol%), N<sub>4</sub> (0.6 mmol, 3.0 equiv), K<sub>2</sub>CO<sub>3</sub> (0.4 mmol, 2.0 equiv), additive (0.04 mmol, 20 mol%), MeCN (2.0 mL), 120 °C, 6 h, N<sub>2</sub>. Isolated yields.

| Entry | The usage of CuCl    | Yield(%) |
|-------|----------------------|----------|
| 1     | 0.04 mmol (20 mol%)  | 68       |
| 2     | 0.08 mmol (40 mol%)  | 73       |
| 3     | 0.12 mmol (60 mol%)  | 87       |
| 4     | 0.16 mmol (80 mol%)  | 70       |
| 5     | 0.20 mmol (100 mol%) | 64       |

<sup>a</sup> Reaction conditions: substrate **1a** (0.2 mmol, 1.0 equiv), **2a** (0.3 mmol, 1.5 equiv), Pd(MeCN)<sub>2</sub>Cl<sub>2</sub> (0.02 mmol, 10 mol%), TFP (0.05 mmol, 25 mol%), N4 (0.6 mmol, 3.0 equiv), K<sub>2</sub>CO<sub>3</sub> (0.4 mmol, 2.0 equiv), additive, MeCN (2.0 mL), 120 °C, 6 h, N<sub>2</sub>. Isolated yields.

**Table 2.** Screening of [NBE]<sup>a</sup>

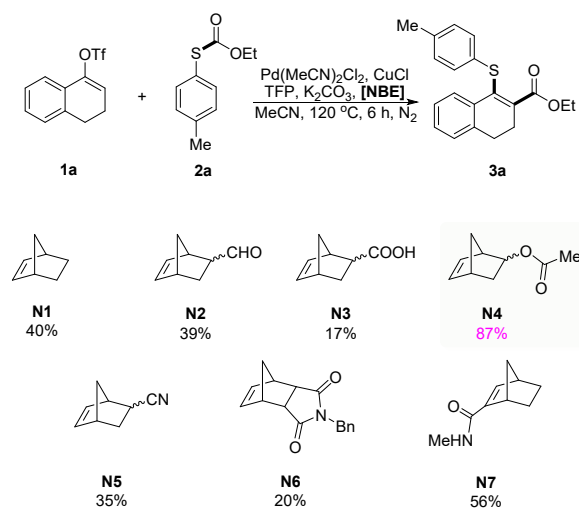

<sup>a</sup> Reaction conditions: substrate **1a** (0.2 mmol, 1.0 equiv), **2a** (0.3 mmol, 1.5 equiv), Pd(MeCN)<sub>2</sub>Cl<sub>2</sub> (0.02 mmol, 10 mol%), TFP (0.05 mmol, 25 mol%), [NBE] (0.6 mmol, 3.0 equiv), K<sub>2</sub>CO<sub>3</sub> (0.4 mmol, 2.0 equiv), CuCl (0.12 mmol, 60 mol%), MeCN (2.0 mL), 120 °C, 6 h, N<sub>2</sub>. Isolated yields.

**Table 3.** Screening of [Pd]<sup>a</sup>

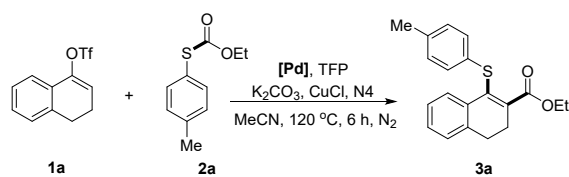

| Entry          | [Pd]                                               | Yield(%) |
|----------------|----------------------------------------------------|----------|
| 1              | Pd(OAc) <sub>2</sub>                               | 20       |
| 2              | Pd(TFA) <sub>2</sub>                               | 75       |
| 3              | PdBr <sub>2</sub>                                  | 66       |
| 4              | PdCl <sub>2</sub>                                  | 78       |
| 5              | Pd(MeCN) <sub>2</sub> Cl <sub>2</sub>              | 87       |
| 6              | PdCl <sub>2</sub> (dppf)                           | 26       |
| 7              | Pd(PCy <sub>3</sub> ) <sub>2</sub> Cl <sub>2</sub> | 14       |
| 8              | Pd(PPh <sub>3</sub> ) <sub>2</sub> Cl <sub>2</sub> | 15       |
| 9 <sup>b</sup> | Pd <sub>2</sub> (dba) <sub>3</sub>                 | 19       |

<sup>a</sup> Reaction conditions: substrate **1a** (0.2 mmol, 1.0 equiv), **2a** (0.3 mmol, 1.5 equiv), [Pd] (0.02 mmol, 10 mol%), TFP (0.05 mmol, 25 mol%), N4 (0.6 mmol, 3.0 equiv), K<sub>2</sub>CO<sub>3</sub> (0.4 mmol, 2.0 equiv), CuCl (0.12 mmol, 60 mol%), MeCN (2.0 mL), 120 °C, 6 h, N<sub>2</sub>. Isolated yields. <sup>b</sup> 5 mol % [Pd] was used.

**Table 4. Screening of Ligand<sup>a</sup>**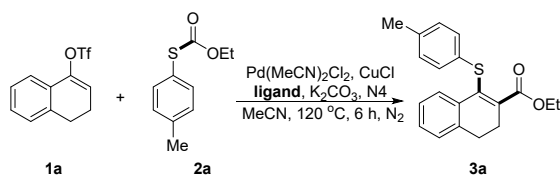

| Entry | Monophosphine ligand               | Yield(%) |
|-------|------------------------------------|----------|
| 1     | TFP                                | 87       |
| 2     | PPh <sub>3</sub>                   | 25       |
| 3     | PCy <sub>3</sub>                   | 5        |
| 4     | ( <i>p</i> -Cl-Ph) <sub>3</sub> P  | 46       |
| 5     | ( <i>p</i> -F-Ph) <sub>3</sub> P   | 40       |
| 6     | ( <i>p</i> -OMe-Ph) <sub>3</sub> P | 30       |
| 7     | (2,4-Me-Ph) <sub>3</sub> P         | 11       |
| 8     | RuPhos                             | 12       |

| Entry | Bisphosphine ligand | Yield(%) |
|-------|---------------------|----------|
| 1     | dppm                | 5        |
| 2     | dppe                | 38       |
| 3     | dppp                | 40       |
| 4     | dppb                | 40       |
| 5     | dppf                | 20       |
| 6     | XantPhos            | 5        |
| 7     | DavePhos            | 6        |

<sup>a</sup> Reaction conditions: substrate **1a** (0.2 mmol, 1.0 equiv), **2a** (0.3 mmol, 1.5 equiv), Pd(MeCN)<sub>2</sub>Cl<sub>2</sub> (0.02 mmol, 10 mol%), ligand (monophosphine ligand, 0.05 mmol, 25 mol%. bisphosphine ligand, 0.026 mmol, 13 mol%), N<sub>4</sub> (0.6 mmol, 3.0 equiv), K<sub>2</sub>CO<sub>3</sub> (0.4 mmol, 2.0 equiv), CuCl (0.12 mmol, 60 mol%), MeCN (2.0 mL), 120 °C, 6 h, N<sub>2</sub>. Isolated yields.

**Table 5. Screening of Base<sup>a</sup>**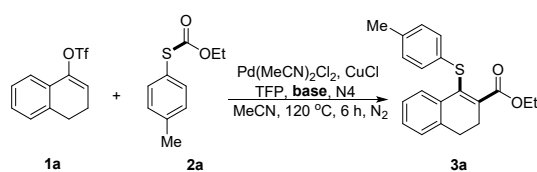

| Entry | base                            | Yield(%) |
|-------|---------------------------------|----------|
| 1     | K <sub>2</sub> CO <sub>3</sub>  | 87       |
| 2     | Cs <sub>2</sub> CO <sub>3</sub> | 10       |
| 3     | K <sub>3</sub> PO <sub>4</sub>  | 18       |
| 4     | Na <sub>2</sub> CO <sub>3</sub> | 5        |
| 5     | Ag <sub>2</sub> CO <sub>3</sub> | 8        |
| 6     | KOAc                            | 7        |
| 7     | NaOAc                           | 5        |

<sup>a</sup> Reaction conditions: substrate **1a** (0.2 mmol, 1.0 equiv), **2a** (0.3 mmol, 1.5 equiv), Pd(MeCN)<sub>2</sub>Cl<sub>2</sub> (0.02 mmol, 10 mol%), TFP (0.05 mmol, 25 mol%), N<sub>4</sub> (0.6 mmol, 3.0 equiv), base (0.4 mmol, 2.0 equiv), CuCl (0.12 mmol, 60 mol%), MeCN (2.0 mL), 120 °C, 6 h, N<sub>2</sub>. Isolated yields.

**Table 6.** Screening of Solvent<sup>a</sup>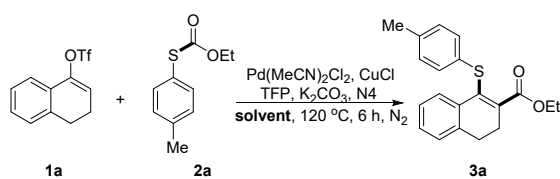

| Entry | solvent | Yield(%) |
|-------|---------|----------|
| 1     | toluene | 15       |
| 2     | dioxane | 37       |
| 3     | MeCN    | 87       |
| 4     | DMF     | 56       |
| 5     | DMSO    | 45       |

<sup>a</sup> Reaction conditions: substrate **1a** (0.2 mmol, 1.0 equiv), **2a** (0.3 mmol, 1.5 equiv), Pd(MeCN)<sub>2</sub>Cl<sub>2</sub> (0.02 mmol, 10 mol%), TFP (0.05 mmol, 25 mol%), N4 (0.6 mmol, 3.0 equiv), K<sub>2</sub>CO<sub>3</sub> (0.4 mmol, 2.0 equiv), CuCl (0.12 mmol, 60 mol%), solvent (2.0 mL), 120 °C, 6 h, N<sub>2</sub>. Isolated yields.

**Table 7.** Screening of Temperature<sup>a</sup>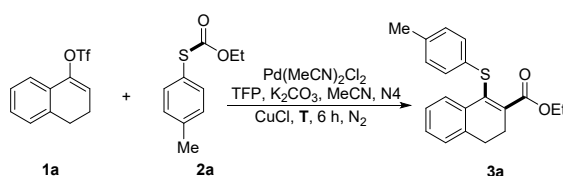

| Entry | T (°C) | Yield(%) |
|-------|--------|----------|
| 1     | 100 °C | 20       |
| 2     | 110 °C | 41       |
| 3     | 120 °C | 87       |
| 4     | 130 °C | 62       |

<sup>a</sup> Reaction conditions: substrate **1a** (0.2 mmol, 1.0 equiv), **2a** (0.3 mmol, 1.5 equiv), Pd(MeCN)<sub>2</sub>Cl<sub>2</sub> (0.02 mmol, 10 mol%), TFP (0.05 mmol, 25 mol%), N4 (0.6 mmol, 3.0 equiv), K<sub>2</sub>CO<sub>3</sub> (0.4 mmol, 2.0 equiv), CuCl (0.12 mmol, 60 mol%), MeCN (2.0 mL), T, 6 h, N<sub>2</sub>. Isolated yields.

## 5. Synthesis and Characterization of Compound 3

### General Procedure 3

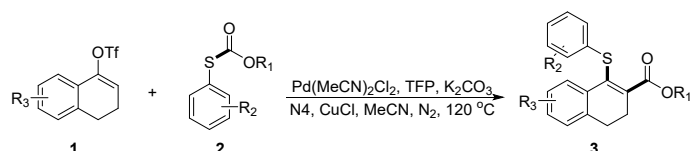

A Schlenk-tube equipped with a magnetic stir bar was charged with Pd(MeCN)<sub>2</sub>Cl<sub>2</sub> (10 mol%, 0.02 mmol), TFP (25 mol%, 0.05 mmol), K<sub>2</sub>CO<sub>3</sub> (2.0 equiv, 0.4 mmol), CuCl (60 mol%, 0.12 mmol) and then evacuated and backfilled with N<sub>2</sub> for 3 times. Afterwards, alkenyl triflates **1** (1.0 equiv, 0.2 mmol), thiocarbonate **2** (1.5 equiv, 0.3 mmol), N4 (3.0 equiv, 0.6 mmol) and MeCN (2 mL) were added



consecutively under N<sub>2</sub> atmosphere. The tight tube was stirred and heated at 120 °C in the oil bath for 6 h. After removal of the solvent under reduced pressure, the crude product was purified by column chromatography on silica gel to give the product **3**.

#### ethyl 1-(*p*-tolylthio)-3,4-dihydronaphthalene-2-carboxylate (**3a**)

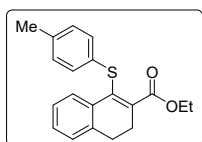

Compound **3a** was prepared from 3,4-dihydronaphthalen-1-yl trifluoromethanesulfonate **1a** and *O*-ethyl *S*-(*p*-tolyl) carbonothioate **2a** according to general procedure 3. The resultant residue was purified by column chromatography on silica gel (PE/DCM = 4 : 1) to afford **3a** as colorless oil (56.4 mg, 87% yield).

**<sup>1</sup>H NMR** (400 MHz, CDCl<sub>3</sub>): δ 7.60 (d, *J* = 8.0 Hz, 1H), 7.09 – 7.03 (m, 4H), 7.02 – 6.96 (m, 1H), 6.90 (d, *J* = 8.0 Hz, 2H), 4.21 (q, *J* = 6.7 Hz, 2H), 2.82 (t, *J* = 8.0 Hz, 2H), 2.62 (t, *J* = 6.0 Hz, 2H), 2.15 (s, 3H), 1.23 (t, *J* = 8.0 Hz, 3H);

**<sup>13</sup>C NMR** (100 MHz, CDCl<sub>3</sub>): δ 168.5, 138.4, 136.7, 135.7, 133.5, 132.5, 132.4, 129.6, 128.6, 128.4, 127.4, 127.2, 126.6, 61.1, 27.6, 26.4, 20.9, 14.1;

**HRMS** (ESI) calcd for C<sub>20</sub>H<sub>21</sub>O<sub>2</sub>S [M+H]<sup>+</sup> 325.1257, found 325.1256.

#### butyl 1-(*p*-tolylthio)-3,4-dihydronaphthalene-2-carboxylate (**3b**)

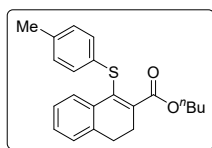

Compound **3b** was prepared from 3,4-dihydronaphthalen-1-yl trifluoromethanesulfonate **1a** and *O*-butyl *S*-(*p*-tolyl) carbonothioate **2b** according to general procedure 3. The resultant residue was purified by column chromatography on silica gel (PE/DCM = 4 : 1) to afford **3b** as colorless oil (54.2 mg, 77% yield).

**<sup>1</sup>H NMR** (400 MHz, CDCl<sub>3</sub>): δ 7.67 (d, *J* = 8.0 Hz, 1H), 7.16 – 7.10 (m, 4H), 7.09 – 7.04 (m, 1H), 6.97 (d, *J* = 8.0 Hz, 2H), 4.22 (t, *J* = 6.0 Hz, 2H), 2.90 (t, *J* = 6.0 Hz, 2H), 2.69 (t, *J* = 8.0 Hz, 2H), 2.22 (s, 3H), 1.70 – 1.60 (m, 2H), 1.44 – 1.35 (m, 2H), 0.90 (t, *J* = 6.0 Hz, 3H);

**<sup>13</sup>C NMR** (100 MHz, CDCl<sub>3</sub>): δ 168.7, 138.5, 136.7, 135.7, 133.3, 132.5, 132.4, 129.6, 128.5, 128.4, 127.4, 127.2, 126.6, 65.1, 30.5, 27.6, 26.5, 20.9, 19.2, 13.7;

**HRMS** (ESI) calcd for C<sub>22</sub>H<sub>25</sub>O<sub>2</sub>S [M+H]<sup>+</sup> 353.1570, found 353.1573.

**methyl 1-(*p*-tolylthio)-3,4-dihydronaphthalene-2-carboxylate (3c)**

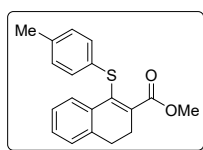

Compound **3c** was prepared from 3,4-dihydronaphthalen-1-yl trifluoromethanesulfonate **1a** and *O*-methyl *S*-(*p*-tolyl) carbonothioate **2c** according to general procedure 3. The resultant residue was purified by column chromatography on silica gel (PE/DCM = 4 : 1) to afford **3c** as colorless oil (52.7 mg, 85% yield).

**<sup>1</sup>H NMR** (400 MHz, CDCl<sub>3</sub>): δ 7.67 (d, *J* = 8.0 Hz, 1H), 7.15 – 7.09 (m, 4H), 7.08 - 7.03 (m, 1H), 6.97 (d, *J* = 8.0 Hz, 2H), 3.80 (s, 3H), 2.88 (t, *J* = 8.0 Hz, 2H), 2.69 (t, *J* = 6.0 Hz, 2H), 2.22 (s, 3H);

**<sup>13</sup>C NMR** (100 MHz, CDCl<sub>3</sub>): δ 168.9, 137.6, 136.8, 135.8, 134.3, 132.4, 132.2, 129.6, 128.7, 128.5, 127.5, 127.2, 126.6, 52.0, 27.6, 26.4, 20.9;

**HRMS** (ESI) calcd for C<sub>19</sub>H<sub>19</sub>O<sub>2</sub>S [M+H]<sup>+</sup> 311.1100, found 311.1101.

**isopropyl 1-(*p*-tolylthio)-3,4-dihydronaphthalene-2-carboxylate (3d)**

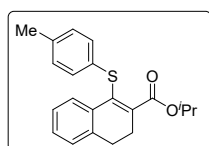

Compound **3d** was prepared from 3,4-dihydronaphthalen-1-yl trifluoromethanesulfonate **1a** and *O*-isopropyl *S*-(*p*-tolyl) carbonothioate **2d** according to general procedure 3. The resultant residue was purified by column chromatography on silica gel (PE/DCM = 4 : 1) to afford **3d** as yellow oil (47.3 mg, 70% yield).

**<sup>1</sup>H NMR** (400 MHz, CDCl<sub>3</sub>): δ 7.59 (d, *J* = 8.0 Hz, 1H), 7.10 – 6.98 (m, 5H), 6.90 (d, *J* = 8.0 Hz, 2H), 5.14 – 5.03 (m, 1H), 2.82 (t, *J* = 8.0 Hz, 2H), 2.60 (t, *J* = 8.0 Hz, 2H), 2.15 (s, 3H), 1.22 (d, *J* = 4.0 Hz, 6H);

**<sup>13</sup>C NMR** (100 MHz, CDCl<sub>3</sub>): δ 168.2, 139.2, 136.2, 135.6, 132.6, 132.4, 129.6, 128.5, 128.3, 127.2, 126.6, 68.9, 27.6, 26.4, 21.8, 20.9;

**HRMS** (ESI) calcd for C<sub>21</sub>H<sub>23</sub>O<sub>2</sub>S [M+H]<sup>+</sup> 339.1413, found 339.1417.

**cyclopropylmethyl 1-(*p*-tolylthio)-3,4-dihydronaphthalene-2-carboxylate (3e)**

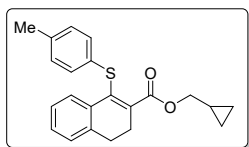

Compound **3e** was prepared from 3,4-dihydronaphthalen-1-yl trifluoromethanesulfonate **1a** and *O*-(cyclopropylmethyl) *S*-(*p*-tolyl) carbonothioate **2e** according to general procedure 3. The resultant residue was purified by column chromatography on silica gel (PE/DCM = 4 : 1) to afford **3e** as colorless oil (45.5 mg, 65% yield).

**<sup>1</sup>H NMR** (400 MHz, CDCl<sub>3</sub>): δ 7.60 (d, *J* = 8.0 Hz, 1H), 7.10 – 7.04 (m, 4H), 7.02 – 6.95 (m, 1H), 6.90 (d, *J* = 8.0 Hz, 2H), 3.98 (d, *J* = 8.0 Hz, 2H), 2.83 (t, *J* = 8.0 Hz, 2H), 2.64 (t, *J* = 6.0 Hz, 2H), 2.15 (s, 3H), 1.14 – 1.04 (m, 1H), 0.47 (q, *J* = 5.3 Hz, 2H), 0.22 (q, *J* = 5.3 Hz, 2H);

**<sup>13</sup>C NMR** (100 MHz, CDCl<sub>3</sub>): δ 168.7, 138.5, 136.7, 135.7, 133.3, 132.5, 132.4, 129.6, 128.7, 128.4, 127.4, 127.2, 126.6, 70.0, 27.6, 26.5, 20.9, 9.7, 3.4;

**HRMS** (ESI) calcd for C<sub>22</sub>H<sub>23</sub>O<sub>2</sub>S [M+H]<sup>+</sup> 351.1413, found 351.1415.

### 2-methoxyethyl 1-(*p*-tolylthio)-3,4-dihydronaphthalene-2-carboxylate (**3f**)

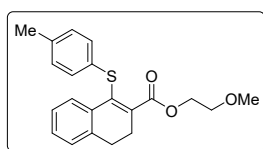

Compound **3f** was prepared from 3,4-dihydronaphthalen-1-yl trifluoromethanesulfonate **1a** and *O*-(2-methoxyethyl) *S*-(*p*-tolyl) carbonothioate **2f** according to general procedure 3. The resultant residue was purified by column chromatography on silica gel (PE/DCM = 4 : 1) to afford **3f** as colorless oil (56.5 mg, 80% yield).

**<sup>1</sup>H NMR** (400 MHz, CDCl<sub>3</sub>): δ 7.67 (d, *J* = 8.0 Hz, 1H), 7.17 – 7.10 (m, 4H), 7.09 – 7.03 (m, 1H), 6.97 (d, *J* = 8.0 Hz, 2H), 4.37 (t, *J* = 4.0 Hz, 2H), 3.62 (t, *J* = 4.0 Hz, 2H), 3.34 (s, 3H), 2.89 (t, *J* = 8.0 Hz, 2H), 2.71 (t, *J* = 8.0 Hz, 2H), 2.22 (s, 3H);

**<sup>13</sup>C NMR** (100 MHz, CDCl<sub>3</sub>): δ 168.4, 137.9, 136.8, 135.7, 134.1, 132.4, 132.3, 129.6, 128.7, 128.5, 127.5, 127.2, 126.6, 70.3, 64.0, 58.9, 27.6, 26.4, 20.9;

**HRMS** (ESI) calcd for C<sub>21</sub>H<sub>23</sub>O<sub>3</sub>S [M+H]<sup>+</sup> 355.1362, found 355.1358.

### 3,3,3-trifluoropropyl 1-(*p*-tolylthio)-3,4-dihydronaphthalene-2-carboxylate (**3g**)

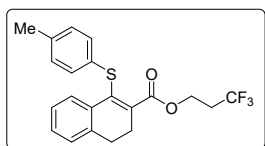

Compound **3g** was prepared from 3,4-dihydronaphthalen-1-yl trifluoromethanesulfonate **1a** and *S*-(*p*-tolyl) *O*-(3,3,3-trifluoropropyl) carbonothioate **2g** according to general procedure 3. The resultant residue was purified by column chromatography on silica gel (PE/DCM = 3 : 1) to afford **3g** as yellow oil (54.9 mg, 70% yield).

<sup>1</sup>H NMR (400 MHz, CDCl<sub>3</sub>): δ 7.60 (d, *J* = 8.0 Hz, 1H), 7.09 – 6.98 (m, 5H), 6.90 (d, *J* = 8.0 Hz, 2H), 4.35 (t, *J* = 6.0 Hz, 2H), 2.82 (t, *J* = 8.0 Hz, 2H), 2.61 (t, *J* = 8.0 Hz, 2H), 2.48 – 2.38 (m, 2H), 2.16 (s, 3H);

<sup>13</sup>C NMR (100 MHz, CDCl<sub>3</sub>): δ 167.7, 136.9, 136.6, 136.0, 135.5, 132.3, 132.1, 130.3 (q, *J* = 290.6 Hz), 129.7, 128.7, 126.7, 127.7, 127.3, 126.7, 57.7 (q, *J* = 3.0 Hz), 33.7 (q, *J* = 29.0 Hz), 27.6, 26.2, 20.9;

<sup>19</sup>F NMR (376 MHz, CDCl<sub>3</sub>): δ -64.91 (t, *J* = 9.4 Hz, 3F);

HRMS (ESI) calcd for C<sub>21</sub>H<sub>20</sub>F<sub>3</sub>O<sub>2</sub>S [M+H]<sup>+</sup> 393.1131, found 393.1132.

### 2-(trimethylsilyl)ethyl 1-(*p*-tolylthio)-3,4-dihydronaphthalene-2-carboxylate (**3h**)

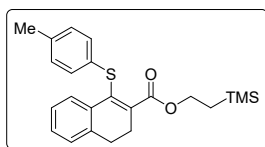

Compound **3h** was prepared from 3,4-dihydronaphthalen-1-yl trifluoromethanesulfonate **1a** and *S*-(*p*-tolyl) *O*-(2-(trimethylsilyl)ethyl) carbonothioate **2h** according to general procedure 3. The resultant residue was purified by column chromatography on silica gel (PE/DCM = 4 : 1) to afford **3h** as colorless oil (27.0 mg, 34% yield).

<sup>1</sup>H NMR (400 MHz, CDCl<sub>3</sub>): δ 7.67 (d, *J* = 8.0 Hz, 1H), 7.15 – 7.11 (m, 4H), 7.10 - 7.06 (m, 1H), 6.97 (d, *J* = 8.0 Hz, 2H), 4.30 (t, *J* = 8.0 Hz, 2H), 2.89 (t, *J* = 8.0 Hz, 2H), 2.68 (t, *J* = 8.0 Hz, 2H), 2.23 (s, 3H), 1.05 (t, *J* = 8.0 Hz, 2H), 0.04 (s, 9H);

<sup>13</sup>C NMR (100 MHz, CDCl<sub>3</sub>): δ 168.7, 138.4, 136.8, 135.7, 135.1, 133.4, 132.6, 132.4, 129.6, 128.7, 128.3, 127.4, 126.6, 63.5, 27.7, 26.4, 20.9, 17.3, -1.5;

HRMS (ESI) calcd for C<sub>23</sub>H<sub>29</sub>O<sub>2</sub>SSi [M+H]<sup>+</sup> 397.1652, found 397.1650.

### 4-bromophenethyl 1-(*p*-tolylthio)-3,4-dihydronaphthalene-2-carboxylate (**3i**)

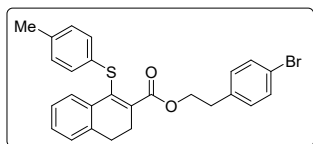

Compound **3i** was prepared from 3,4-dihydronaphthalen-1-yl trifluoromethanesulfonate **1a** and *O*-(4-bromophenethyl) *S*-(*p*-tolyl) carbonothioate **2i** according to general procedure

3. The resultant residue was purified by column chromatography on silica gel (PE/DCM = 4 : 1) to afford **3i** as colorless oil (75.5 mg, 79% yield).

<sup>1</sup>H NMR (400 MHz, CDCl<sub>3</sub>): δ 7.57 (d, *J* = 8.0 Hz, 1H), 7.33 (d, *J* = 8.0 Hz, 1H), 7.28 – 7.23 (m, 2H), 7.03 – 6.96 (m, 6H), 6.87 (d, *J* = 8.0 Hz, 2H), 4.33 (t, *J* = 6.0 Hz, 2H), 2.88 – 2.79 (m, 4H), 2.54 (t, *J* = 8.0 Hz, 2H), 2.14 (s, 3H);

<sup>13</sup>C NMR (100 MHz, CDCl<sub>3</sub>): δ 168.3, 137.8, 136.8, 136.7, 135.7, 133.8, 132.3, 131.6, 131.4, 130.6, 130.6, 129.6, 128.5, 127.5, 127.2, 126.6, 120.3, 65.0, 34.3, 27.6, 26.4, 20.9;

HRMS (ESI) calcd for C<sub>26</sub>H<sub>24</sub>BrO<sub>2</sub>S [M+H]<sup>+</sup> 479.0675, found 479.0677.

### 3,7-dimethyloct-6-en-1-yl 1-(*p*-tolylthio)-3,4-dihydronaphthalene-2-carboxylate (**3j**)

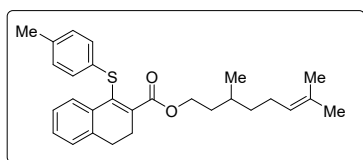

Compound **3j** was prepared from 3,4-dihydronaphthalen-1-yl trifluoromethanesulfonate **1a** and *O*-(3,7-dimethyloct-6-en-1-yl) *S*-(*p*-tolyl) carbonothioate **2j** according to general procedure 3. The resultant residue was purified

by column chromatography on silica gel (PE/DCM = 4 : 1) to afford **3j** as colorless oil (62.5 mg, 72% yield).

<sup>1</sup>H NMR (400 MHz, CDCl<sub>3</sub>): δ 7.67 (d, *J* = 8.0 Hz, 1H), 7.15 – 7.04 (m, 5H), 6.97 (d, *J* = 8.0 Hz, 2H), 5.07 (t, *J* = 8.0 Hz, 1H), 4.25 (t, *J* = 8.0 Hz, 2H), 2.90 (t, *J* = 6.0 Hz, 2H), 2.69 (t, *J* = 8.0 Hz, 2H), 2.22 (s, 3H), 1.94 (q, *J* = 8.0 Hz, 2H), 1.68 (s, 3H), 1.62 – 1.54 (m, 5H), 1.51 – 1.13 (m, 1H), 1.34 (q, *J* = 8.0 Hz, 2H), 0.89 (d, *J* = 8.0 Hz, 3H);

<sup>13</sup>C NMR (100 MHz, CDCl<sub>3</sub>): δ 168.7, 138.5, 136.7, 135.7, 133.2, 132.5, 132.4, 131.2, 129.6, 128.5, 128.4, 127.4, 127.3, 126.6, 124.6, 63.7, 36.9, 35.3, 29.4, 27.6, 26.5, 25.7,

25.4, 20.9, 19.3, 17.6;

HRMS (ESI) calcd for C<sub>28</sub>H<sub>35</sub>O<sub>2</sub>S [M+H]<sup>+</sup> 435.2352, found 435.2355.

**2-isopropyl-5-methylcyclohexyl 1-(*p*-tolylthio)-3,4-dihydronaphthalene-2-carboxylate (3k)**

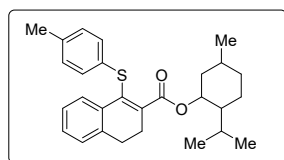

Compound **3k** was prepared from 3,4-dihydronaphthalen-1-yl trifluoromethanesulfonate **1a** and *O*-(2-isopropyl-5-methylcyclohexyl) *S*-(*p*-tolyl) carbonothioate **2k** according to general procedure 3. The resultant residue was purified by column chromatography on silica gel (PE/DCM = 4 : 1) to afford **3k** as colorless oil (66.0 mg, 76% yield).

<sup>1</sup>H NMR (400 MHz, CDCl<sub>3</sub>): δ 7.68 (d, *J* = 8.0 Hz, 1H), 7.15 – 7.05 (m, 5H), 6.97 (d, *J* = 8.0 Hz, 2H), 4.87 – 4.78 (m, 1H), 2.91 (t, *J* = 8.0 Hz, 2H), 2.68 (t, *J* = 8.0 Hz, 2H), 2.22 (s, 3H), 2.13 – 2.05 (m, 1H), 1.96 – 1.90 (m, 1H), 1.71 – 1.63 (m, 2H), 1.52 – 1.47 (m, 1H), 1.43 – 1.36 (m, 2H), 1.10 – 1.01 (m, 2H), 0.90 (d, *J* = 8.0 Hz, 3H), 0.81 (d, *J* = 4.0 Hz, 3H), 0.75 (d, *J* = 8.0 Hz, 3H);

<sup>13</sup>C NMR (100 MHz, CDCl<sub>3</sub>): δ 168.3, 139.9, 136.4, 135.5, 132.5, 132.5, 131.3, 129.5, 128.3, 128.2, 127.3, 127.1, 126.7, 75.3, 46.9, 40.6, 34.2, 31.4, 27.6, 26.6, 26.0, 23.2, 22.0, 20.9, 20.7, 16.1;

HRMS (ESI) calcd for C<sub>28</sub>H<sub>35</sub>O<sub>2</sub>S [M+H]<sup>+</sup> 435.2352, found 435.2350.

**2,2-dimethyl-3-(*m*-tolyl)propyl 1-(*p*-tolylthio)-3,4-dihydronaphthalene-2-carboxylate (3l)**

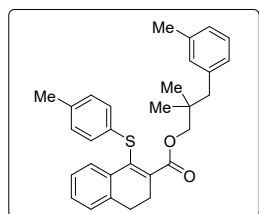

Compound **3l** was prepared from 3,4-dihydronaphthalen-1-yl trifluoromethanesulfonate **1a** and *O*-(2,2-dimethyl-3-(*m*-tolyl)propyl) *S*-(*p*-tolyl) carbonothioate **2l** according to general procedure 3. The resultant residue was purified by column chromatography on silica gel (PE/DCM = 4 : 1) to afford **3l** as colorless oil (73.9 mg, 81% yield).

<sup>1</sup>H NMR (400 MHz, CDCl<sub>3</sub>): δ 7.70 (d, *J* = 8.0 Hz, 1H), 7.19 – 7.11 (m, 6H), 7.02 –

6.92 (m, 5H), 3.93 (s, 1H), 3.85 (s, 1H), 2.92 (t,  $J = 8.0$  Hz, 2H), 2.74 (t,  $J = 8.0$  Hz, 2H), 2.32 (s, 3H), 2.29 (s, 3H), 2.20 (s, 2H), 0.96 (s, 3H), 0.92 (s, 3H);

$^{13}\text{C}$  NMR (100 MHz,  $\text{CDCl}_3$ ):  $\delta$  168.7, 138.6, 138.0, 137.3, 136.7, 135.6, 133.2, 132.4, 131.3, 129.6, 128.4, 127.7, 127.6, 127.5, 127.5, 127.3, 126.8, 126.7, 126.6, 75.0, 44.8, 35.1, 27.7, 26.7, 24.3, 24.1, 21.4, 20.9;

HRMS (ESI) calcd for  $\text{C}_{30}\text{H}_{33}\text{O}_2\text{S}$   $[\text{M}+\text{H}]^+$  457.2196, found 457.2204.

### ethyl 1-((4-(*tert*-butyl)phenyl)thio)-3,4-dihydronaphthalene-2-carboxylate (**3m**)

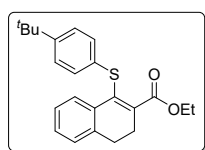

Compound **3m** was prepared from 3,4-dihydronaphthalen-1-yl trifluoromethanesulfonate **1a** and *S*-(4-(*tert*-butyl)phenyl) *O*-ethyl carbonothioate **2m** according to general procedure 3. The resultant residue was purified by column chromatography on silica gel (PE/DCM = 4 : 1) to afford **3m** as colorless oil (62.9 mg, 86% yield).

$^1\text{H}$  NMR (400 MHz,  $\text{CDCl}_3$ ):  $\delta$  7.71 (d,  $J = 8.0$  Hz, 1H), 7.19 – 7.13 (m, 4H), 7.11 – 7.06 (m, 1H), 4.26 (q,  $J = 6.7$  Hz, 2H), 2.91 (t,  $J = 8.0$  Hz, 2H), 2.69 (t,  $J = 8.0$  Hz, 2H), 1.28 (t,  $J = 8.0$  Hz, 3H), 1.23 (s, 9H);

$^{13}\text{C}$  NMR (100 MHz,  $\text{CDCl}_3$ ):  $\delta$  168.6, 148.9, 138.8, 136.6, 132.8, 132.7, 132.4, 128.4, 128.0, 127.3, 127.3, 126.7, 125.9, 61.1, 34.3, 31.2, 27.6, 26.5, 14.1;

HRMS (ESI) calcd for  $\text{C}_{23}\text{H}_{27}\text{O}_2\text{S}$   $[\text{M}+\text{H}]^+$  367.1726, found 367.1729.

### ethyl 1-((4-bromophenyl)thio)-3,4-dihydronaphthalene-2-carboxylate (**3n**)

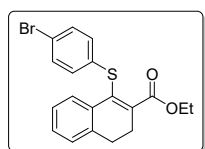

Compound **3n** was prepared from 3,4-dihydronaphthalen-1-yl trifluoromethanesulfonate **1a** and *S*-(4-bromophenyl) *O*-ethyl carbonothioate **2n** according to general procedure 3. The resultant residue was purified by column chromatography on silica gel (PE/DCM = 3 : 1) to afford **3n** as colorless oil (64.4 mg, 83% yield).

$^1\text{H}$  NMR (400 MHz,  $\text{CDCl}_3$ ):  $\delta$  7.54 (d,  $J = 8.0$  Hz, 1H), 7.20 (d,  $J = 8.0$  Hz, 2H), 7.10 – 7.04 (m, 2H), 7.03 – 6.97 (m, 3H), 4.20 (q,  $J = 8.0$  Hz, 2H), 2.83 (t,  $J = 8.0$  Hz, 2H),

2.63 (t,  $J = 8.0$  Hz, 2H), 1.22 (t,  $J = 6.0$  Hz, 3H);

$^{13}\text{C}$  NMR (100 MHz,  $\text{CDCl}_3$ ):  $\delta$  168.3, 139.6, 136.7, 135.4, 132.2, 132.1, 131.8, 129.7, 128.7, 127.4, 127.2, 126.8, 119.6, 61.2, 27.5, 26.5, 14.1;

HRMS (ESI) calcd for  $\text{C}_{19}\text{H}_{18}\text{BrO}_2\text{S}$   $[\text{M}+\text{H}]^+$  389.0205, found 389.0200.

### ethyl 1-((4-fluorophenyl)thio)-3,4-dihydronaphthalene-2-carboxylate (**3o**)

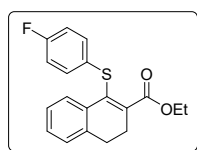

Compound **3o** was prepared from 3,4-dihydronaphthalen-1-yl trifluoromethanesulfonate **1a** and *O*-ethyl *S*-(4-fluorophenyl) carbonothioate **2o** according to general procedure 3. The resultant residue was purified by column chromatography on silica gel (PE/DCM = 2 : 1) to afford **3o** as colorless oil (50.5 mg, 77% yield).

$^1\text{H}$  NMR (400 MHz,  $\text{CDCl}_3$ ):  $\delta$  7.63 (d,  $J = 8.0$  Hz, 1H), 7.26 – 7.12 (m, 4H), 7.10 – 7.05 (m, 1H), 6.87 (t,  $J = 8.0$  Hz, 2H), 4.29 (q,  $J = 6.7$  Hz, 2H), 2.89 (t,  $J = 8.0$  Hz, 2H), 2.69 (t,  $J = 8.0$  Hz, 2H), 1.31 (t,  $J = 8.0$  Hz, 3H);

$^{13}\text{C}$  NMR (100 MHz,  $\text{CDCl}_3$ ):  $\delta$  168.4, 162.6 (d,  $J = 245.0$  Hz), 138.6, 136.8, 133.4, 132.1, 131.0 (d,  $J = 3.0$  Hz), 130.5 (d,  $J = 8.0$  Hz), 128.6, 127.4, 127.3, 126.6, 116.0 (d,  $J = 22.0$  Hz), 61.2, 27.6, 26.4, 14.1;

$^{19}\text{F}$  NMR (376 MHz,  $\text{CDCl}_3$ ):  $\delta$  -116.05 (s, 1F);

HRMS (ESI) calcd for  $\text{C}_{19}\text{H}_{18}\text{FO}_2\text{S}$   $[\text{M}+\text{H}]^+$  329.1006, found 329.1005.

### ethyl 1-((4-chlorophenyl)thio)-3,4-dihydronaphthalene-2-carboxylate (**3p**)

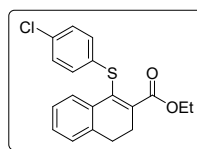

Compound **3p** was prepared from 3,4-dihydronaphthalen-1-yl trifluoromethanesulfonate **1a** and *S*-(4-chlorophenyl) *O*-ethyl carbonothioate **2p** according to general procedure 3. The resultant residue was purified by column chromatography on silica gel (PE/DCM = 3 : 1) to afford **3p** as colorless oil (55.7 mg, 81% yield).

$^1\text{H}$  NMR (400 MHz,  $\text{CDCl}_3$ ):  $\delta$  7.61 (d,  $J = 8.0$  Hz, 1H), 7.18 – 7.06 (m, 7H), 4.27 (q,  $J = 6.7$  Hz, 2H), 2.90 (t,  $J = 8.0$  Hz, 2H), 2.70 (t,  $J = 8.0$  Hz, 2H), 1.29 (t,  $J = 8.0$  Hz,



3H);

$^{13}\text{C}$  NMR (100 MHz,  $\text{CDCl}_3$ ):  $\delta$  168.2, 139.4, 136.7, 134.7, 132.4, 132.0, 131.6, 129.5, 128.9, 128.6, 127.4, 127.1, 126.7, 61.2, 27.5, 26.4, 14.1;

HRMS (ESI) calcd for  $\text{C}_{19}\text{H}_{18}\text{ClO}_2\text{S}$   $[\text{M}+\text{H}]^+$  345.0711, found 345.0714.

### ethyl 1-((3-chlorophenyl)thio)-3,4-dihydronaphthalene-2-carboxylate (**3q**)

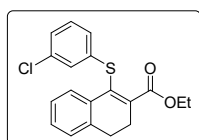

Compound **3q** was prepared from 3,4-dihydronaphthalen-1-yl trifluoromethanesulfonate **1a** and *S*-(3-chlorophenyl) *O*-ethyl carbonothioate **2q** according to general procedure 3. The resultant residue was purified by column chromatography on silica gel (PE/DCM = 3 : 1) to afford **3q** as colorless oil (57.8 mg, 84% yield).

$^1\text{H}$  NMR (400 MHz,  $\text{CDCl}_3$ ):  $\delta$  7.63 (d,  $J$  = 8.0 Hz, 1H), 7.22 (s, 1H), 7.19 – 7.01 (m, 6H), 4.27 (q,  $J$  = 8.0 Hz, 2H), 2.92 (t,  $J$  = 8.0 Hz, 2H), 2.72 (t,  $J$  = 8.0 Hz, 2H), 1.29 (t,  $J$  = 6.0 Hz, 3H);

$^{13}\text{C}$  NMR (100 MHz,  $\text{CDCl}_3$ ):  $\delta$  168.2, 140.3, 136.6, 135.6, 132.2, 131.9, 131.8, 129.4, 128.9, 128.8, 127.4, 127.0, 126.9, 126.4, 61.2, 27.5, 26.6, 14.0;

HRMS (ESI) calcd for  $\text{C}_{19}\text{H}_{18}\text{ClO}_2\text{S}$   $[\text{M}+\text{H}]^+$  345.0711, found 345.0711.

### ethyl 1-((2-chlorophenyl)thio)-3,4-dihydronaphthalene-2-carboxylate (**3r**)

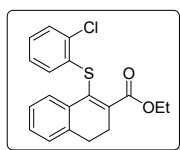

Compound **3r** was prepared from 3,4-dihydronaphthalen-1-yl trifluoromethanesulfonate **1a** and *S*-(2-chlorophenyl) *O*-ethyl carbonothioate **2r** according to general procedure 3. The resultant residue was purified by column chromatography on silica gel (PE/DCM = 3 : 1) to afford **3r** as colorless oil (52.3 mg, 76% yield).

$^1\text{H}$  NMR (400 MHz,  $\text{CDCl}_3$ ):  $\delta$  7.59 (d,  $J$  = 8.0 Hz, 1H), 7.30 (t,  $J$  = 4.0 Hz, 1H), 7.18 – 7.13 (m, 2H), 7.09 (t,  $J$  = 8.0 Hz, 1H), 7.02 – 6.97 (m, 3H), 4.26 (q,  $J$  = 8.0 Hz, 2H), 2.95 (t,  $J$  = 8.0 Hz, 2H), 2.74 (t,  $J$  = 6.0 Hz, 2H), 1.26 (t,  $J$  = 6.0 Hz, 3H);

$^{13}\text{C}$  NMR (100 MHz,  $\text{CDCl}_3$ ):  $\delta$  168.2, 140.3, 136.6, 135.6, 132.2, 131.9, 131.8, 129.4,

128.9, 128.8, 127.4, 127.0, 126.9, 126.4, 61.2, 27.5, 26.6, 14.0;

**HRMS** (ESI) calcd for C<sub>19</sub>H<sub>18</sub>ClO<sub>2</sub>S [M+H]<sup>+</sup> 345.0711, found 345.0714.

### ethyl 1-((2-fluorophenyl)thio)-3,4-dihydronaphthalene-2-carboxylate (**3s**)

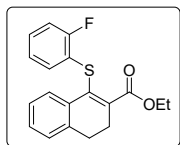

Compound **3s** was prepared from 3,4-dihydronaphthalen-1-yl trifluoromethanesulfonate **1a** and *O*-ethyl *S*-(2-fluorophenyl) carbonothioate **2s** according to general procedure 3. The resultant residue was purified by column chromatography on silica gel (PE/DCM = 2 : 1) to afford **3s** as colorless oil (47.3 mg, 72% yield).

**<sup>1</sup>H NMR** (400 MHz, CDCl<sub>3</sub>): δ 7.56 (d, *J* = 12.0 Hz, 1H), 7.09 – 6.97 (m, 5H), 6.92 – 6.81 (m, 2H), 4.21 (q, *J* = 8.0 Hz, 2H), 2.83 (t, *J* = 8.0 Hz, 2H), 2.64 (t, *J* = 6.0 Hz, 2H), 1.23 (t, *J* = 6.0 Hz, 3H);

**<sup>13</sup>C NMR** (100 MHz, CDCl<sub>3</sub>): δ 168.1, 161.2 (d, *J* = 244.0 Hz), 138.6, 136.8, 133.0, 132.9, 132.3, 130.7 (d, *J* = 2.0 Hz), 128.6, 127.7 (d, *J* = 8.0 Hz), 127.3, 127.1, 126.6, 124.4 (d, *J* = 4.0 Hz), 123.4 (d, *J* = 7.0 Hz), 115.5 (d, *J* = 22.0 Hz), 61.2, 27.6, 26.4, 14.1;

**<sup>19</sup>F NMR** (376 MHz, CDCl<sub>3</sub>): δ -111.28 (s, 1F);

**HRMS** (ESI) calcd for C<sub>19</sub>H<sub>18</sub>FO<sub>2</sub>S [M+H]<sup>+</sup> 329.1006, found 329.1003.

### ethyl 1-((2-methoxyphenyl)thio)-3,4-dihydronaphthalene-2-carboxylate (**3t**)

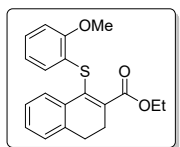

Compound **3t** was prepared from 3,4-dihydronaphthalen-1-yl trifluoromethanesulfonate **1a** and *O*-ethyl *S*-(2-methoxyphenyl) carbonothioate **2t** according to general procedure 3. The resultant residue was purified by column chromatography on silica gel (PE/DCM = 2 : 1) to afford **3t** as colorless oil (48.3 mg, 71% yield).

**<sup>1</sup>H NMR** (400 MHz, CDCl<sub>3</sub>): δ 7.61 (d, *J* = 8.0 Hz, 1H), 7.14 – 7.01 (m, 4H), 6.98 (d, *J* = 8.0 Hz, 1H), 6.81 – 6.68 (m, 2H), 4.25 (q, *J* = 6.7 Hz, 2H), 3.85 (s, 3H), 2.91 (t, *J* = 8.0 Hz, 2H), 2.70 (t, *J* = 8.0 Hz, 2H), 1.26 (t, *J* = 6.0 Hz, 3H);

$^{13}\text{C}$  NMR (100 MHz,  $\text{CDCl}_3$ ):  $\delta$  168.3, 156.1, 138.5, 136.6, 133.2, 132.6, 128.9, 128.4, 127.1, 127.1, 126.7, 126.5, 124.5, 121.0, 110.4, 61.0, 55.7, 27.7, 26.5, 14.0;

HRMS (ESI) calcd for  $\text{C}_{20}\text{H}_{21}\text{O}_3\text{S}$   $[\text{M}+\text{H}]^+$  341.1206, found 341.1207.

### ethyl 1-(thiophen-2-ylthio)-3,4-dihydronaphthalene-2-carboxylate (**3u**)

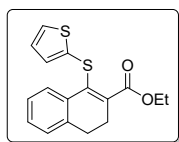

Compound **3u** was prepared from 3,4-dihydronaphthalen-1-yl trifluoromethanesulfonate **1a** and *O*-ethyl *S*-(thiophen-2-yl) carbonothioate **2u** according to general procedure 3. The resultant residue was purified by column chromatography on silica gel (PE/DCM = 3 : 1) to afford **3u** as yellow oil (51.2 mg, 81% yield).

$^1\text{H}$  NMR (400 MHz,  $\text{CDCl}_3$ ):  $\delta$  7.78 (t,  $J$  = 4.0 Hz, 1H), 7.12 – 7.00 (m, 5H), 6.76 (t,  $J$  = 4.0 Hz, 1H), 4.27 (q,  $J$  = 8.0 Hz, 2H), 2.73 (t,  $J$  = 8.0 Hz, 2H), 2.56 (t,  $J$  = 8.0 Hz, 2H), 1.31 (t,  $J$  = 6.0 Hz, 3H);

$^{13}\text{C}$  NMR (100 MHz,  $\text{CDCl}_3$ ):  $\delta$  168.2, 137.0, 136.7, 135.7, 134.1, 132.3, 131.9, 128.5, 128.5, 127.3, 127.2, 127.1, 126.4, 61.2, 27.5, 26.4, 14.2;

HRMS (ESI) calcd for  $\text{C}_{17}\text{H}_{17}\text{O}_2\text{S}_2$   $[\text{M}+\text{H}]^+$  317.0664, found 317.0666.

### ethyl 1-(*p*-tolylthio)-7-(((trifluoromethyl)sulfonyl)oxy)-3,4-dihydronaphthalene-2-carboxylate (**3v**)

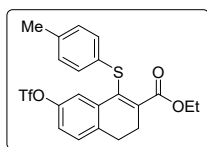

Compound **3v** was prepared from 3,4-dihydronaphthalene-1,7-diyl bis(trifluoromethanesulfonate) **1v** and *O*-ethyl *S*-(*p*-tolyl) carbonothioate **2a** according to general procedure 3. The resultant residue was purified by column chromatography on silica gel (PE/DCM = 3 : 1) to afford **3v** as yellow oil (76.5 mg, 81% yield).

$^1\text{H}$  NMR (400 MHz,  $\text{CDCl}_3$ ):  $\delta$  7.51 (s, 1H), 7.13 – 7.04 (m, 3H), 7.00 – 6.89 (m, 3H), 4.23 (q,  $J$  = 8.0 Hz, 2H), 2.82 (t,  $J$  = 8.0 Hz, 2H), 2.63 (t,  $J$  = 8.0 Hz, 2H), 2.16 (s, 3H), 1.25 (t,  $J$  = 8.0 Hz, 3H);

$^{13}\text{C}$  NMR (100 MHz,  $\text{CDCl}_3$ ):  $\delta$  168.1, 148.4, 140.3, 136.8, 136.6, 135.1, 132.0, 130.8,

129.8, 129.2, 128.8, 123.3 (q,  $J = 302.0$  Hz), 120.8, 120.0, 61.4, 27.0, 26.2, 20.9, 14.1;

$^{19}\text{F}$  NMR (376 MHz,  $\text{CDCl}_3$ ):  $\delta$  -72.91 (s, 3F);

HRMS (ESI) calcd for  $\text{C}_{21}\text{H}_{20}\text{F}_3\text{O}_5\text{S}_2$   $[\text{M}+\text{H}]^+$  473.0699, found 473.0697.

### ethyl 7-bromo-1-(*p*-tolylthio)-3,4-dihydronaphthalene-2-carboxylate (**3w**)

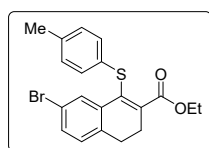

Compound **3w** was prepared from 7-bromo-3,4-dihydronaphthalen-1-yl trifluoromethanesulfonate **1w** and *O*-ethyl *S*-(*p*-tolyl) carbonothioate **2a** according to general procedure 3. The resultant residue was purified by column chromatography on silica gel (PE/DCM = 3 : 1) to afford **3w** as yellow oil (68.4 mg, 85% yield).

$^1\text{H}$  NMR (400 MHz,  $\text{CDCl}_3$ ):  $\delta$  7.83 (s, 1H), 7.24 (d,  $J = 8.0$  Hz, 1H), 7.16 (d,  $J = 8.0$  Hz, 2H), 7.02 – 6.96 (m, 3H), 4.28 (q,  $J = 6.7$  Hz, 2H), 2.82 (t,  $J = 8.0$  Hz, 2H), 2.67 (t,  $J = 8.0$  Hz, 2H), 2.24 (s, 3H), 1.31 (t,  $J = 6.0$  Hz, 3H);

$^{13}\text{C}$  NMR (100 MHz,  $\text{CDCl}_3$ ):  $\delta$  168.2, 139.5, 136.3, 135.5, 134.6, 132.5, 131.5, 131.1, 130.2, 129.7, 129.1, 128.8, 120.3, 61.3, 27.1, 26.3, 21.0, 14.1;

HRMS (ESI) calcd for  $\text{C}_{20}\text{H}_{20}\text{BrO}_2\text{S}$   $[\text{M}+\text{H}]^+$  403.0362, found 403.0359.

### ethyl 7-methoxy-1-(*p*-tolylthio)-3,4-dihydronaphthalene-2-carboxylate (**3x**)

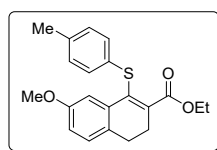

Compound **3x** was prepared from 7-methoxy-3,4-dihydronaphthalen-1-yl trifluoromethanesulfonate **1x** and *O*-ethyl *S*-(*p*-tolyl) carbonothioate **2a** according to general procedure 3. The resultant residue was purified by column chromatography on silica gel (PE/DCM = 2 : 1) to afford **3x** as colorless oil (51.7 mg, 73% yield).

$^1\text{H}$  NMR (400 MHz,  $\text{CDCl}_3$ ):  $\delta$  7.19 (s, 1H), 7.12 – 7.05 (m, 2H), 6.97 – 6.88 (m, 3H), 6.61 (d,  $J = 8.0$  Hz, 1H), 4.21 (q,  $J = 8.0$  Hz, 2H), 3.55 (s, 3H), 2.75 (t,  $J = 6.0$  Hz, 2H), 2.60 (t,  $J = 6.0$  Hz, 2H), 2.16 (s, 3H), 1.24 (t,  $J = 8.0$  Hz, 3H);

$^{13}\text{C}$  NMR (100 MHz,  $\text{CDCl}_3$ ):  $\delta$  168.6, 158.2, 138.6, 135.9, 133.7, 133.5, 132.3, 129.6,

128.9, 128.0, 114.4, 112.8, 61.2, 55.2, 26.8, 26.7, 21.0, 14.1;

**HRMS** (ESI) calcd for C<sub>21</sub>H<sub>23</sub>O<sub>3</sub>S [M+H]<sup>+</sup> 355.1362, found 355.1364.

### ethyl 6-methoxy-1-(*p*-tolylthio)-3,4-dihydronaphthalene-2-carboxylate (**3y**)

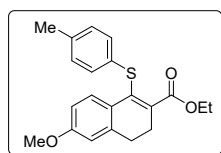

Compound **3y** was prepared from 6-methoxy-3,4-dihydronaphthalen-1-yl trifluoromethanesulfonate **1y** and *O*-ethyl *S*-(*p*-tolyl) carbonothioate **2a** according to general procedure 3. The resultant residue was purified by column chromatography on silica gel (PE/DCM = 2 : 1) to afford **3y** as colorless oil (54.7 mg, 77% yield).

**<sup>1</sup>H NMR** (400 MHz, CDCl<sub>3</sub>): δ 7.52 (d, *J* = 8.0 Hz, 1H), 7.04 (d, *J* = 8.0 Hz, 2H), 6.89 (d, *J* = 8.0 Hz, 2H), 6.59 (s, 1H), 6.51 (d, *J* = 12.0 Hz, 1H), 4.19 (q, *J* = 6.7 Hz, 2H), 3.68 (s, 3H), 2.78 (t, *J* = 8.0 Hz, 2H), 2.60 (t, *J* = 8.0 Hz, 2H), 2.16 (s, 3H), 1.23 (t, *J* = 6.0 Hz, 3H);

**<sup>13</sup>C NMR** (100 MHz, CDCl<sub>3</sub>): δ 168.6, 159.6, 138.8, 135.6, 135.3, 134.0, 132.7, 129.6, 129.2, 128.6, 125.6, 113.3, 111.3, 61.0, 55.2, 28.2, 26.4, 20.9, 14.2;

**HRMS** (ESI) calcd for C<sub>21</sub>H<sub>23</sub>O<sub>3</sub>S [M+H]<sup>+</sup> 355.1362, found 355.1361.

### ethyl 5-methoxy-1-(*p*-tolylthio)-3,4-dihydronaphthalene-2-carboxylate (**3z**)

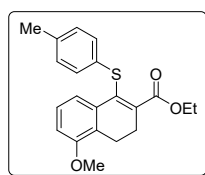

Compound **3z** was prepared from 5-methoxy-3,4-dihydronaphthalen-1-yl trifluoromethanesulfonate **1z** and *O*-ethyl *S*-(*p*-tolyl) carbonothioate **2a** according to general procedure 3. The resultant residue was purified by column chromatography on silica gel (PE/DCM = 2 : 1) to afford **3z** as colorless oil (53.2 mg, 75% yield).

**<sup>1</sup>H NMR** (400 MHz, CDCl<sub>3</sub>): δ 7.35 (d, *J* = 8.0 Hz, 1H), 7.12 (d, *J* = 8.0 Hz, 2H), 7.03 (t, *J* = 8.0 Hz, 1H), 6.96 (d, *J* = 8.0 Hz, 2H), 6.77 (d, *J* = 12.0 Hz, 1H), 4.27 (q, *J* = 8.0 Hz, 2H), 3.82 (s, 3H), 2.90 (t, *J* = 8.0 Hz, 2H), 2.64 (t, *J* = 8.0 Hz, 2H), 2.22 (s, 3H), 1.30 (t, *J* = 8.0 Hz, 3H);

**<sup>13</sup>C NMR** (100 MHz, CDCl<sub>3</sub>): δ 168.7, 155.6, 139.0, 135.6, 133.6, 132.8, 132.6, 129.6,

128.4, 126.5, 124.8, 120.1, 110.9, 61.1, 55.6, 26.0, 20.9, 19.5, 14.1;

**HRMS** (ESI) calcd for C<sub>21</sub>H<sub>23</sub>O<sub>3</sub>S [M+H]<sup>+</sup> 355.1362, found 355.1366.

### ethyl 4-(*p*-tolylthio)-2*H*-chromene-3-carboxylate (**3A**)

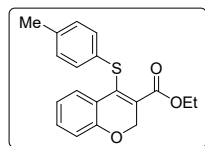

Compound **3A** was prepared from 2*H*-chromen-4-yl trifluoromethanesulfonate **1A** and *O*-ethyl *S*-(*p*-tolyl) carbonothioate **2a** according to general procedure 3. The resultant residue was purified by column chromatography on silica gel (PE/DCM = 2 : 1) to afford **3A** as colorless oil (45.1 mg, 69% yield).

**<sup>1</sup>H NMR** (400 MHz, CDCl<sub>3</sub>): δ 7.41 (d, *J* = 12.0 Hz, 1H), 7.09 – 6.99 (m, 3H), 6.89 (d, *J* = 8.0 Hz, 2H), 6.82 (d, *J* = 8.0 Hz, 1H), 6.68 (t, *J* = 8.0 Hz, 1H), 4.86 (s, 2H), 4.21 (q, *J* = 6.7 Hz, 2H), 2.16 (s, 3H), 1.26 (t, *J* = 8.0 Hz, 3H);

**<sup>13</sup>C NMR** (100 MHz, CDCl<sub>3</sub>): δ 164.7, 155.8, 138.0, 136.3, 131.7, 130.9, 129.7, 129.5, 128.8, 127.7, 122.0, 121.6, 116.3, 66.2, 61.2, 21.0, 14.2;

**HRMS** (ESI) calcd for C<sub>19</sub>H<sub>19</sub>O<sub>3</sub>S [M+H]<sup>+</sup> 327.1049, found 327.1051.

### ethyl 6-chloro-4-(*p*-tolylthio)-2*H*-chromene-3-carboxylate (**3B**)

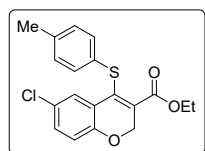

Compound **3B** was prepared from 6-chloro-2*H*-chromen-4-yl trifluoromethanesulfonate **1B** and *O*-ethyl *S*-(*p*-tolyl) carbonothioate **2a** according to general procedure 3. The resultant residue was purified by column chromatography on silica gel (PE/DCM = 2 : 1) to afford **3B** as colorless oil (53.3 mg, 74% yield).

**<sup>1</sup>H NMR** (400 MHz, CDCl<sub>3</sub>): δ 7.46 (s, 1H), 7.12 (d, *J* = 8.0 Hz, 2H), 7.06 (d, *J* = 8.0 Hz, 1H), 7.00 (d, *J* = 8.0 Hz, 2H), 6.82 (d, *J* = 12.0 Hz, 1H), 4.92 (s, 2H), 4.28 (q, *J* = 6.7 Hz, 2H), 2.25 (s, 3H), 1.32 (t, *J* = 8.0 Hz, 3H);

**<sup>13</sup>C NMR** (100 MHz, CDCl<sub>3</sub>): δ 164.5, 154.2, 136.9, 136.7, 130.9, 130.5, 129.8, 129.8, 128.6, 128.3, 126.7, 123.4, 117.7, 66.4, 61.4, 21.0, 14.1;

**HRMS** (ESI) calcd for C<sub>19</sub>H<sub>18</sub>ClO<sub>3</sub>S [M+H]<sup>+</sup> 361.0660, found 361.0662.

### ethyl 9-(*p*-tolylthio)-6,7-dihydro-5*H*-benzo[7]annulene-8-carboxylate (**3C**)

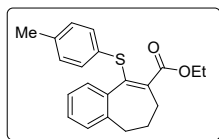

Compound **3C** was prepared from 6,7-dihydro-5*H*-benzo[7]annulene-9-yl trifluoromethanesulfonate **1C** and *O*-ethyl *S*-(*p*-tolyl) carbonothioate **2a** according to general procedure 3. The resultant residue was purified by column chromatography on silica gel (PE/DCM = 4 : 1) to afford **3C** as colorless oil (55.5 mg, 82% yield).

**<sup>1</sup>H NMR** (400 MHz, CDCl<sub>3</sub>): δ 7.17 (t, *J* = 10.0 Hz, 1H), 6.99 – 6.91 (m, 4H), 6.87 (t, *J* = 8.0 Hz, 1H), 6.75 (d, *J* = 8.0 Hz, 2H), 4.25 (q, *J* = 8.0 Hz, 2H), 2.60 (t, *J* = 6.0 Hz, 2H), 2.17 – 2.06 (m, 7H), 1.30 (t, *J* = 8.0 Hz, 3H);

**<sup>13</sup>C NMR** (100 MHz, CDCl<sub>3</sub>): δ 168.0, 146.3, 140.9, 137.4, 136.9, 132.3, 131.0, 129.7, 129.3, 129.1, 128.0, 127.9, 125.7, 60.8, 34.7, 31.7, 27.8, 21.0, 14.3;

**HRMS** (ESI) calcd for C<sub>21</sub>H<sub>23</sub>O<sub>2</sub>S [M+H]<sup>+</sup> 339.1413, found 339.1417.

### ethyl 2-(*p*-tolylthio)cyclohex-1-ene-1-carboxylate (**3D**)

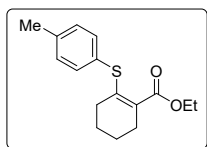

Compound **3D** was prepared from cyclohex-1-en-1-yl trifluoromethanesulfonate **1D** and *O*-ethyl *S*-(*p*-tolyl) carbonothioate **2a** according to general procedure 3. The resultant residue was purified by column chromatography on silica gel (PE/DCM = 4 : 1) to afford **3D** as colorless oil (27.7 mg, 50% yield).

**<sup>1</sup>H NMR** (400 MHz, CDCl<sub>3</sub>): δ 7.32 (d, *J* = 8.0 Hz, 2H), 7.07 (d, *J* = 8.0 Hz, 2H), 4.18 (q, *J* = 8.0 Hz, 2H), 2.46 – 2.20 (m, 7H), 1.96 – 1.85 (m, 2H), 1.52 – 1.44 (m, 2H), 1.25 (t, *J* = 8.0 Hz, 3H);

**<sup>13</sup>C NMR** (100 MHz, CDCl<sub>3</sub>): δ 167.7, 148.9, 138.8, 135.6, 129.6, 128.5, 122.4, 60.3, 31.7, 27.2, 23.0, 21.8, 21.2, 14.3;

**HRMS** (ESI) calcd for C<sub>16</sub>H<sub>21</sub>O<sub>2</sub>S [M+H]<sup>+</sup> 277.1257, found 277.1258.

## 6. Scale-up Reaction

### General Procedure 4

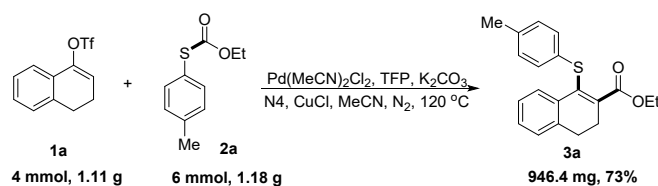

A Schlenk-tube equipped with a magnetic stir bar was charged with Pd(MeCN)<sub>2</sub>Cl<sub>2</sub> (103.8 mg, 10 mol%, 0.4 mmol), TFP (232.0 mg, 25 mol%, 1.0 mmol), K<sub>2</sub>CO<sub>3</sub> (1105.7 mg, 2.0 equiv, 8.0 mmol), CuCl (237.6 mg, 60 mol%, 2.4 mmol) and then evacuated and backfilled with N<sub>2</sub> for 3 times. Afterwards, alkenyl triflates **1** (1112.8 mg, 1.0 equiv, 4.0 mmol), thiocarbonate **2** (1176.3 mg, 1.5 equiv, 6.0 mmol), N<sub>4</sub> (1826.3 mg, 3.0 equiv, 12.0 mmol) and MeCN (40 mL) were added consecutively under N<sub>2</sub> atmosphere. The tight tube was stirred and heated at 120 °C in the oil bath for 6 h. After removal of the solvent under reduced pressure, the crude product was purified by column chromatography on silica gel to give the product **3a** (946.4 mg, 73% yield).

## 7. Synthetic Transformation

### Preparation and Characterization Data of **4a**

#### General Procedure 5

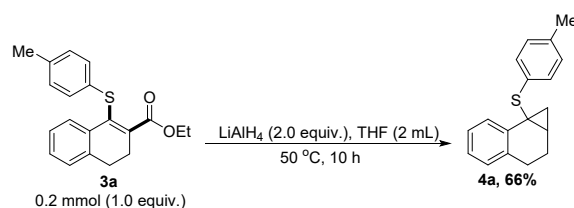

A stirred solution of **3a** (0.2 mmol), LiAlH<sub>4</sub> (0.4 mmol) in THF (2 mL) at 50 °C for 10 h. After filtering and evaporating the solvent, the crude product was purified by column chromatography on silica gel to afford the product **4a** (35.3 mg, 66% yield).

### (**1**, **1a**, **2**, **3**-tetrahydro-7*bH*-cyclopropa[*a*]naphthalen-7*b*-yl)(*p*-tolyl)sulfane (**4a**)

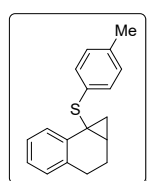

Compound **4a** was prepared from ethyl 1-(*p*-tolylthio)-3,4-dihydronaphthalene-2-carboxylate **3a** and LiAlH<sub>4</sub> according to general procedure 5. The resultant residue was purified by column chromatography on silica gel (PE) to afford **4a** as colorless oil (35.3 mg,



66% yield).

<sup>1</sup>H NMR (400 MHz, CDCl<sub>3</sub>): δ 7.92 (d, *J* = 8.0 Hz, 1H), 7.20 – 6.95 (m, 7H), 2.72 (t, *J* = 8.0 Hz, 1H), 2.56 (t, *J* = 16.0 Hz, 1H), 2.31 – 2.15 (m, 4H), 2.09 – 1.92 (m, 2H), 1.50 (t, *J* = 4.0 Hz, 1H), 1.42 (t, *J* = 8.0 Hz, 1H);

<sup>13</sup>C NMR (100 MHz, CDCl<sub>3</sub>): δ 138.3, 134.4, 134.3, 133.5, 129.4, 128.6, 128.2, 126.5, 125.6, 28.3, 26.3, 26.3, 20.8, 19.7, 19.4;

HRMS (ESI) calcd for C<sub>18</sub>H<sub>19</sub>S [M+H]<sup>+</sup> 267.1202, found 267.1200.

## Preparation and Characterization Data of 4b

### General Procedure 6

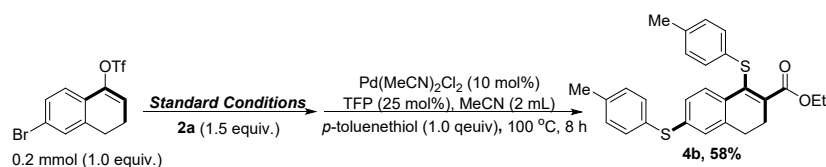

A Schlenk-tube equipped with a magnetic stir bar was charged with Pd(MeCN)<sub>2</sub>Cl<sub>2</sub> (10 mol%, 0.02 mmol), TFP (25 mol%, 0.05 mmol), K<sub>2</sub>CO<sub>3</sub> (2.0 equiv, 0.4 mmol), CuCl (60 mol%, 0.12 mmol) and then evacuated and backfilled with N<sub>2</sub> for 3 times. Afterwards, alkenyl triflates (1.0 equiv, 0.2 mmol), thiocarbonate **2a** (1.5 equiv, 0.3 mmol), N<sub>4</sub> (3.0 equiv, 0.6 mmol) and MeCN (2 mL) were added consecutively under N<sub>2</sub> atmosphere. The tight tube was stirred and heated at 120 °C in the oil bath for 6 h. After the reaction was completed, the system was cooled to room temperature and *p*-toluenethiol (1.0 equiv, 0.2 mmol) was added to the system under N<sub>2</sub> atmosphere and stirred for 8 h at 100 °C. After removal of the solvent under reduced pressure, the crude product was purified by column chromatography on silica gel to give the product **4b** (53.1 mg, 58% yield).

### ethyl 1,6-bis(*p*-tolylthio)-3,4-dihydronaphthalene-2-carboxylate (**4b**)

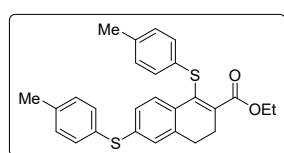

Compound **4b** was prepared from 6-bromo-3,4-dihydronaphthalen-1-yl trifluoromethanesulfonate, *O*-ethyl *S*-(*p*-tolyl) carbonothioate **2a** and *p*-toluenethiol according to

general procedure 6. The resultant residue was purified by column chromatography on silica gel (PE/DCM = 3 : 1) to afford **4b** as colorless oil (53.1 mg, 58% yield).

<sup>1</sup>H NMR (400 MHz, CDCl<sub>3</sub>): δ 7.46 (d, *J* = 8.0 Hz, 1H), 7.25 – 7.17 (m, 3H), 7.11 – 6.96 (m, 4H), 6.92 – 6.87 (m, 2H), 6.79 (d, *J* = 8.0 Hz, 1H), 4.19 (q, *J* = 8.0 Hz, 2H), 2.73 (t, *J* = 8.0 Hz, 2H), 2.59 (t, *J* = 6.0 Hz, 2H), 2.28 (s, 3H), 2.17 (s, 3H), 1.22 (t, *J* = 8.0 Hz, 3H);

<sup>13</sup>C NMR (100 MHz, CDCl<sub>3</sub>): δ 168.9, 138.4, 137.7, 137.5, 135.8, 133.3, 133.2, 132.3, 132.1, 132.1, 130.2, 129.8, 129.6, 128.7, 128.0, 127.0, 126.5, 61.1, 27.7, 26.4, 21.2, 21.0, 14.1;

HRMS (ESI) calcd for C<sub>27</sub>H<sub>27</sub>O<sub>2</sub>S<sub>2</sub> [M+H]<sup>+</sup> 447.1447, found 447.1449.

## 8. One-Pot Triflation/Thioesterification from Ketone

### General Procedure 7

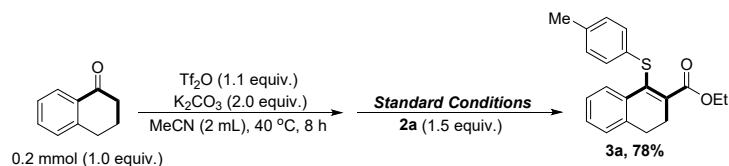

A Schlenk-tube equipped with a magnetic stir bar was charged with K<sub>2</sub>CO<sub>3</sub> (2.0 equiv, 0.4 mmol) and then evacuated and backfilled with N<sub>2</sub> for 3 times. Afterwards, 3,4-dihydronaphthalen-1(2*H*)-one (1.0 equiv, 0.2 mmol), Tf<sub>2</sub>O (1.1 equiv, 0.22 mmol) and MeCN (2 mL) were added consecutively under N<sub>2</sub> atmosphere. The tight tube was stirred and heated at 40 °C in the oil bath for 8 h. After the reaction was completed, the system was cooled to room temperature and Pd(MeCN)<sub>2</sub>Cl<sub>2</sub> (10 mol%, 0.02 mmol), TFP (25 mol%, 0.05 mmol), CuCl (60 mol%, 0.12 mmol), thiocarbonate **2** (1.5 equiv, 0.3 mmol) and N4 (3.0 equiv, 0.6 mmol) was added to the system under N<sub>2</sub> atmosphere and stirred for 6 h at 120 °C. After removal of the solvent under reduced pressure, the crude product was purified by column chromatography on silica gel to give the product **3a** (50.6 mg, 78% yield).

## 9. Thioesterification of Alkenes by Alkenyl Iodides

### General Procedure 8

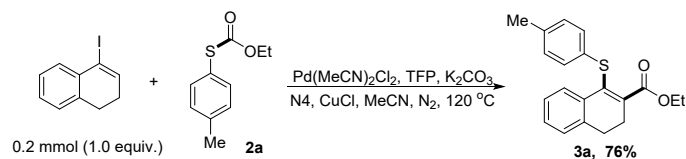

A Schlenk-tube equipped with a magnetic stir bar was charged with Pd(MeCN)<sub>2</sub>Cl<sub>2</sub> (10 mol%, 0.02 mmol), TFP (25 mol%, 0.05 mmol), K<sub>2</sub>CO<sub>3</sub> (2.0 equiv, 0.4 mmol), CuCl (60 mol%, 0.12 mmol) and then evacuated and backfilled with N<sub>2</sub> for 3 times. Afterwards, 4-iodo-1,2-dihydronaphthalene (1.0 equiv, 0.2 mmol), thiocarbonate **2a** (1.5 equiv, 0.3 mmol), N<sub>4</sub> (3.0 equiv, 0.6 mmol) and MeCN (2 mL) were added consecutively under N<sub>2</sub> atmosphere. The tight tube was stirred and heated at 120 °C in the oil bath for 6 h. After removal of the solvent under reduced pressure, the crude product was purified by column chromatography on silica gel to give the product **3a** (49.3 mg, 76% yield).

## 10. Investigation of Reaction Mechanism

### Proposed Reaction Mechanism

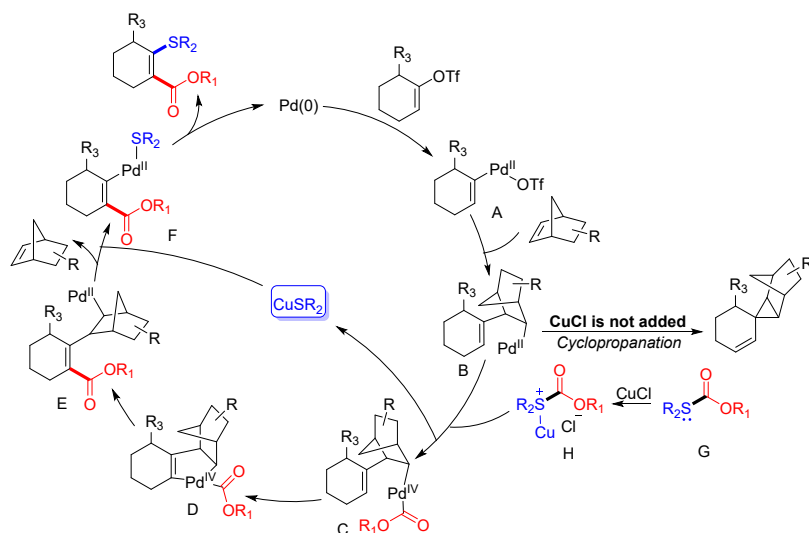

According to previous literature,<sup>[5-7]</sup> a possible mechanism is proposed. Firstly, the vinyl-Pd(II) intermediate A is formed by oxidative addition of alkenyl triflates to the Pd(0) complex, then it undergoes the insertion of norbornene to obtain intermediate B. The thiocarbonate G then forms sulfonium salt H with the CuCl and activates the C(O)-

S bond. Sulfonium salt G undergoes oxidative addition with intermediate B to form the intermediate C. Subsequent *ortho*-C–H activation generate a five-membered palladacycle D (ANP). The intermediate E of alkoxyacylation of olefin was obtained by reduction elimination. Intermediate E undergoes the extrusion of norbornene and transmetalization with CuSR<sub>2</sub> to give intermediate F. Finally, The product of olefin thioesterification was obtained by reduction elimination. When CuCl is not added, the intermediate B is easy to form cyclopropanated products.

### Control Experiment of CuCl

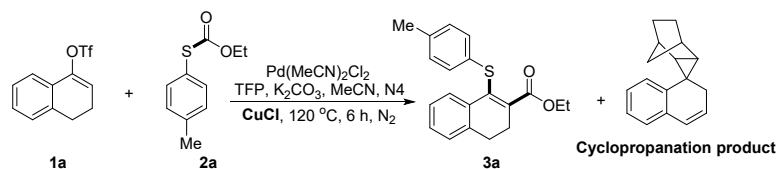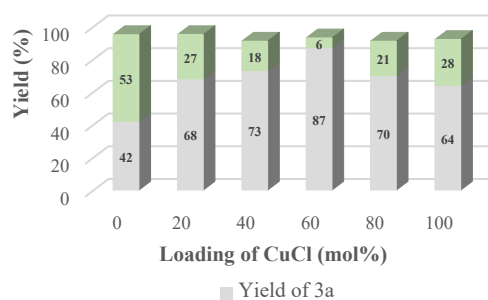

Reaction conditions: substrate **1a** (0.2 mmol, 1.0 equiv), **2a** (0.3 mmol, 1.5 equiv), Pd(MeCN)<sub>2</sub>Cl<sub>2</sub> (0.02 mmol, 10 mol%), TFP (0.05 mmol, 25 mol%), N<sub>4</sub> (0.6 mmol, 3.0 equiv), K<sub>2</sub>CO<sub>3</sub> (0.4 mmol, 2.0 equiv), CuCl, MeCN (2.0 mL), 120 °C, 6 h, N<sub>2</sub>. Isolated yields.

# 11. Copies of $^1\text{H}$ , $^{13}\text{C}$ , and $^{19}\text{F}$ NMR Spectra

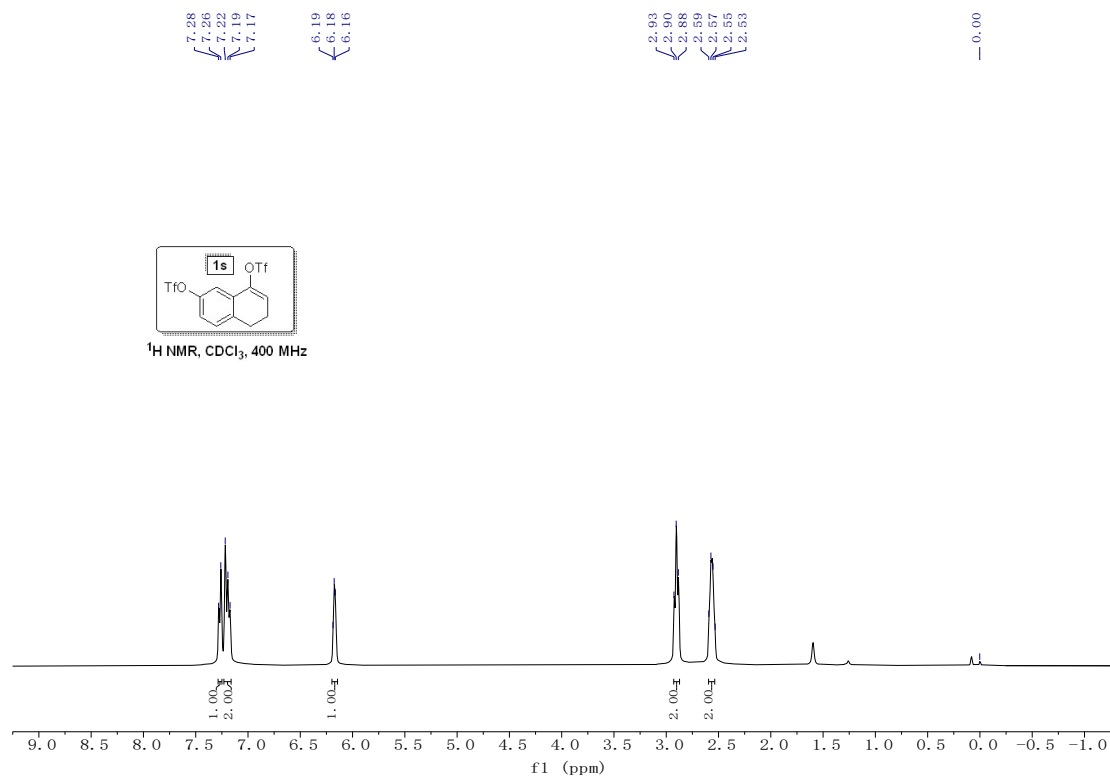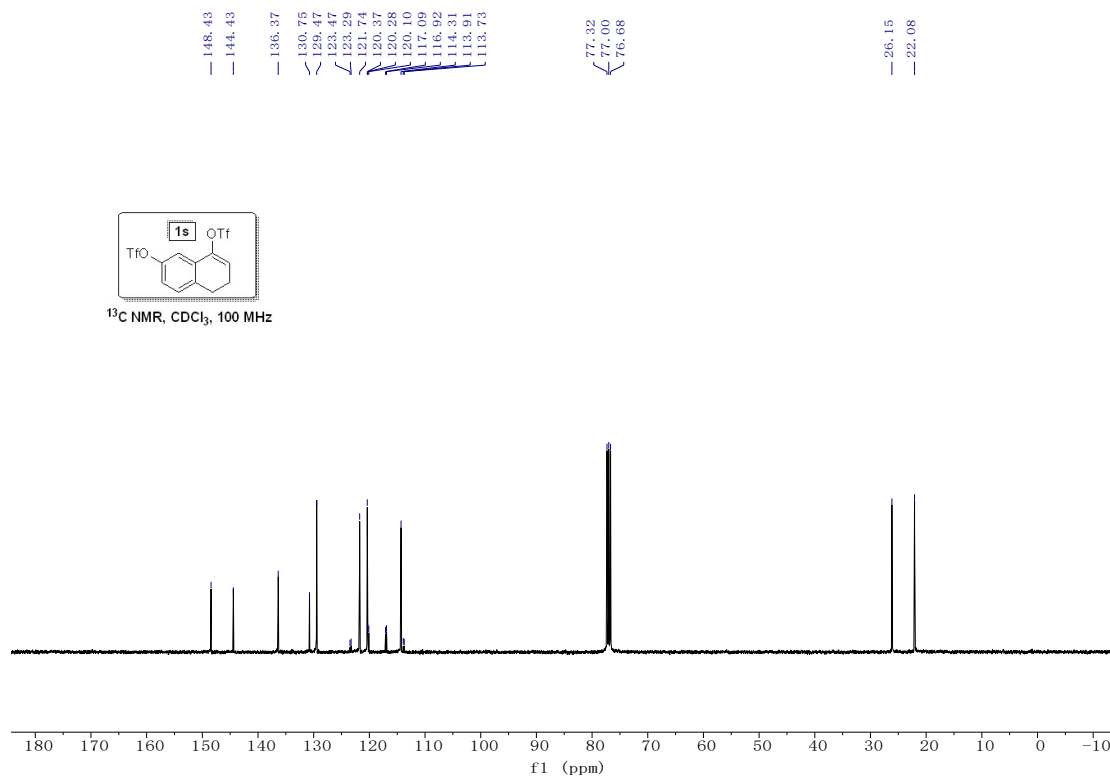



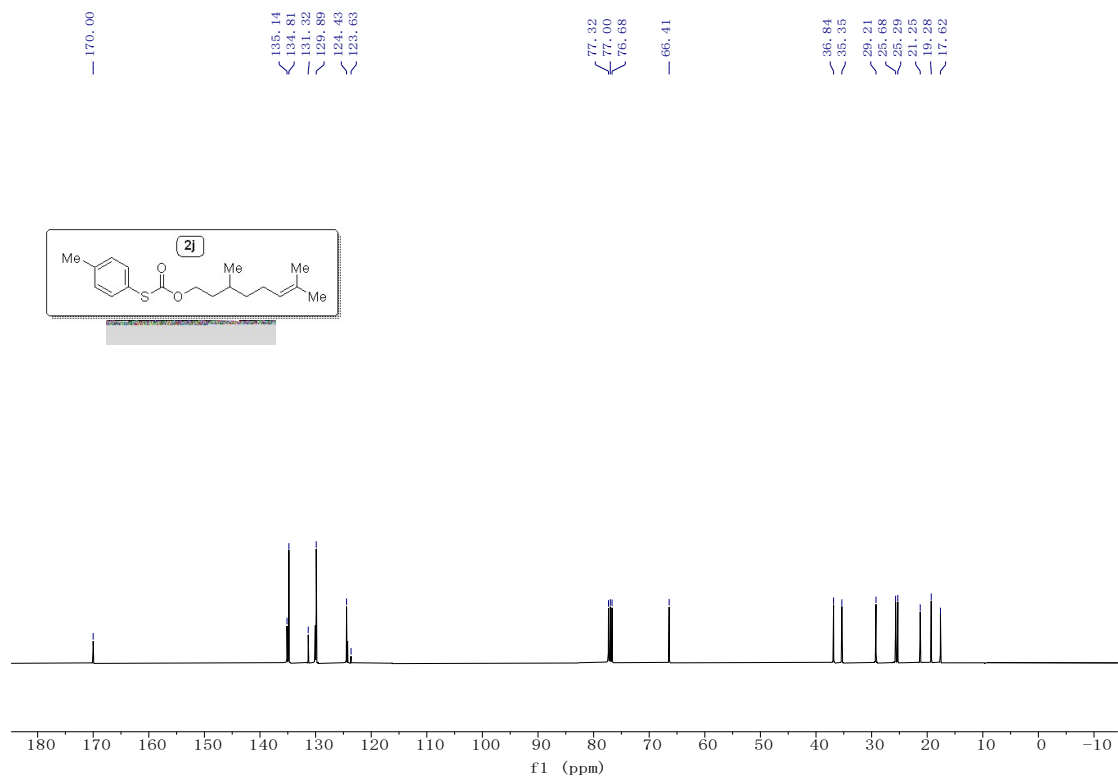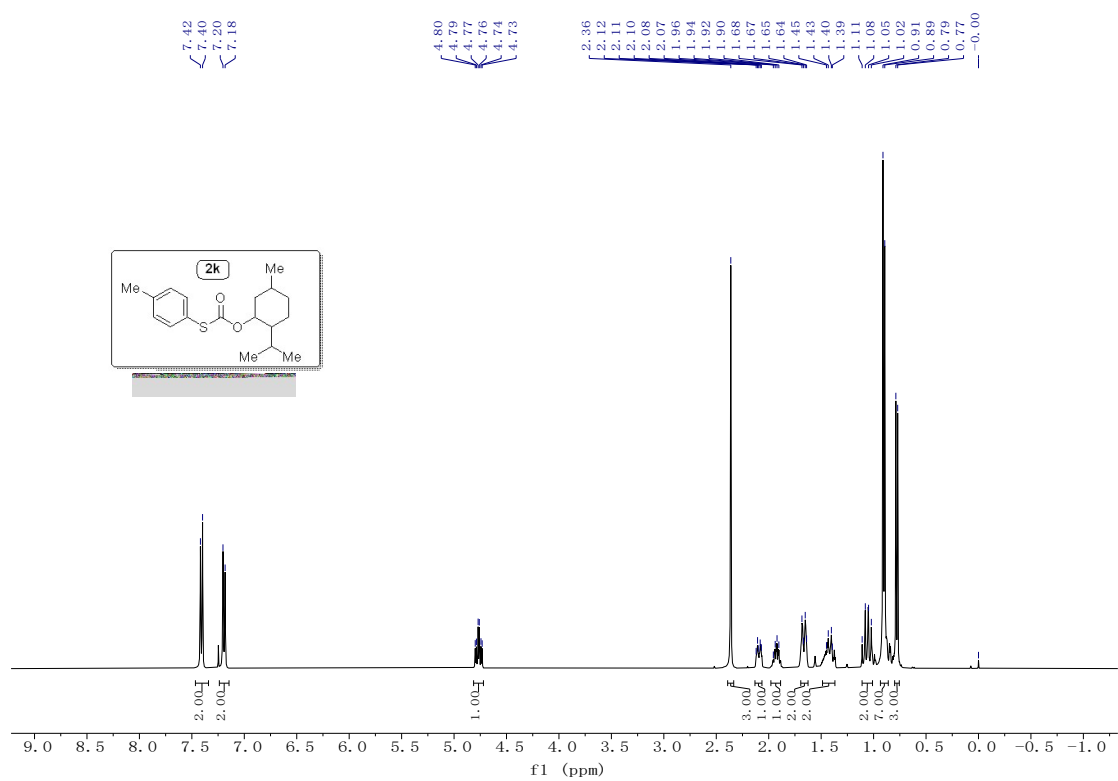

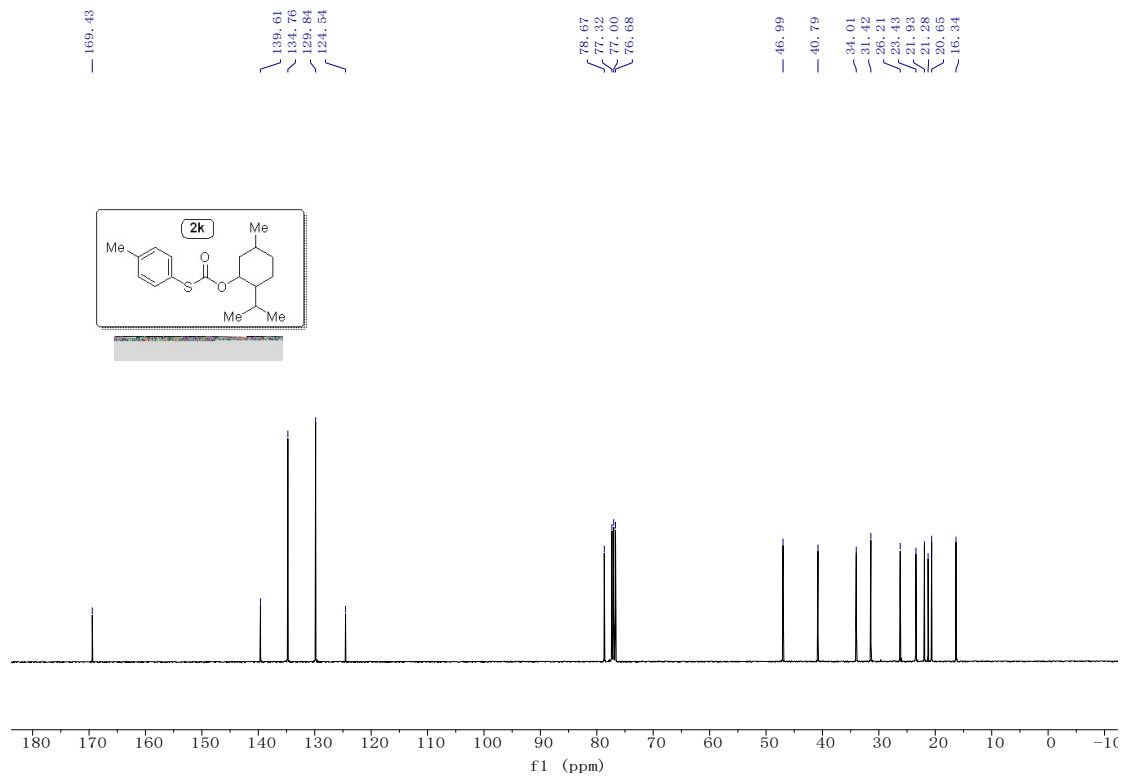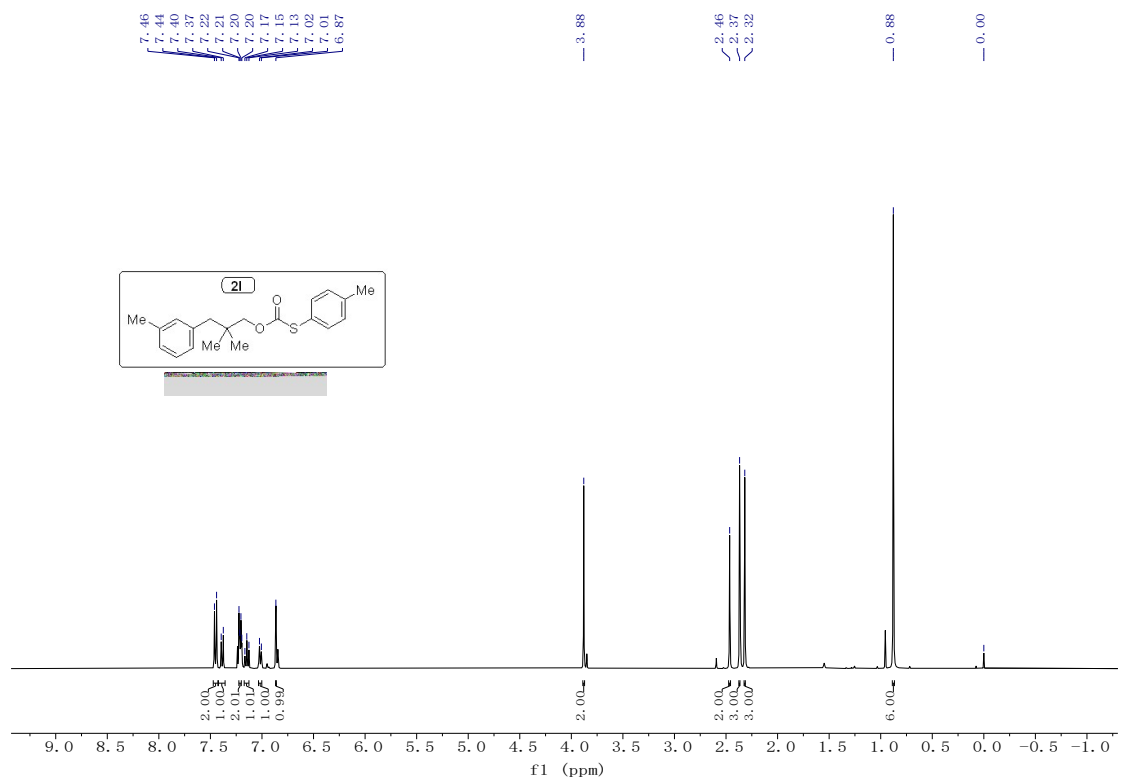



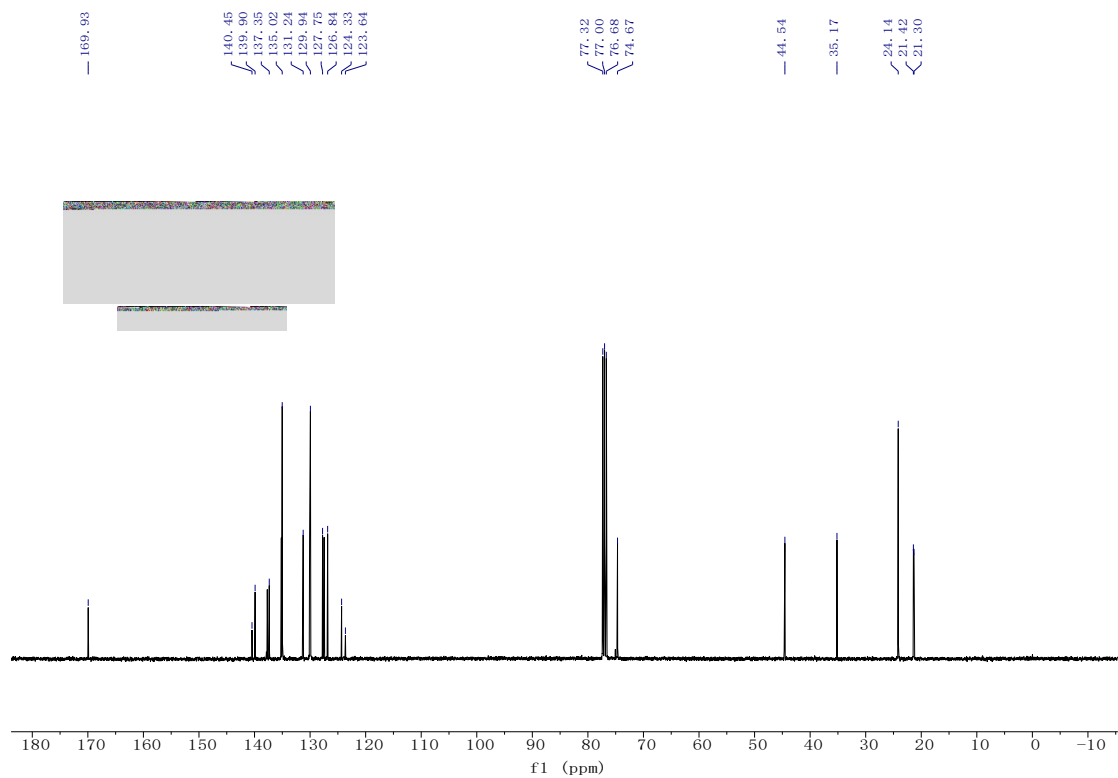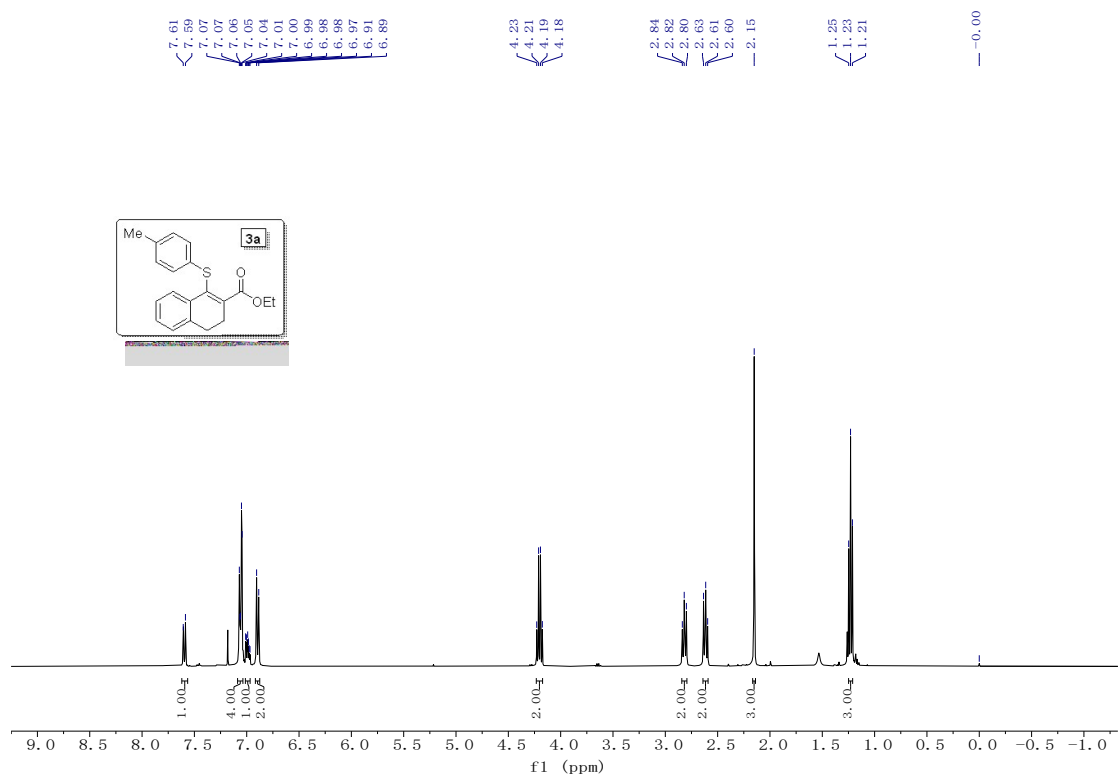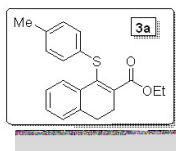

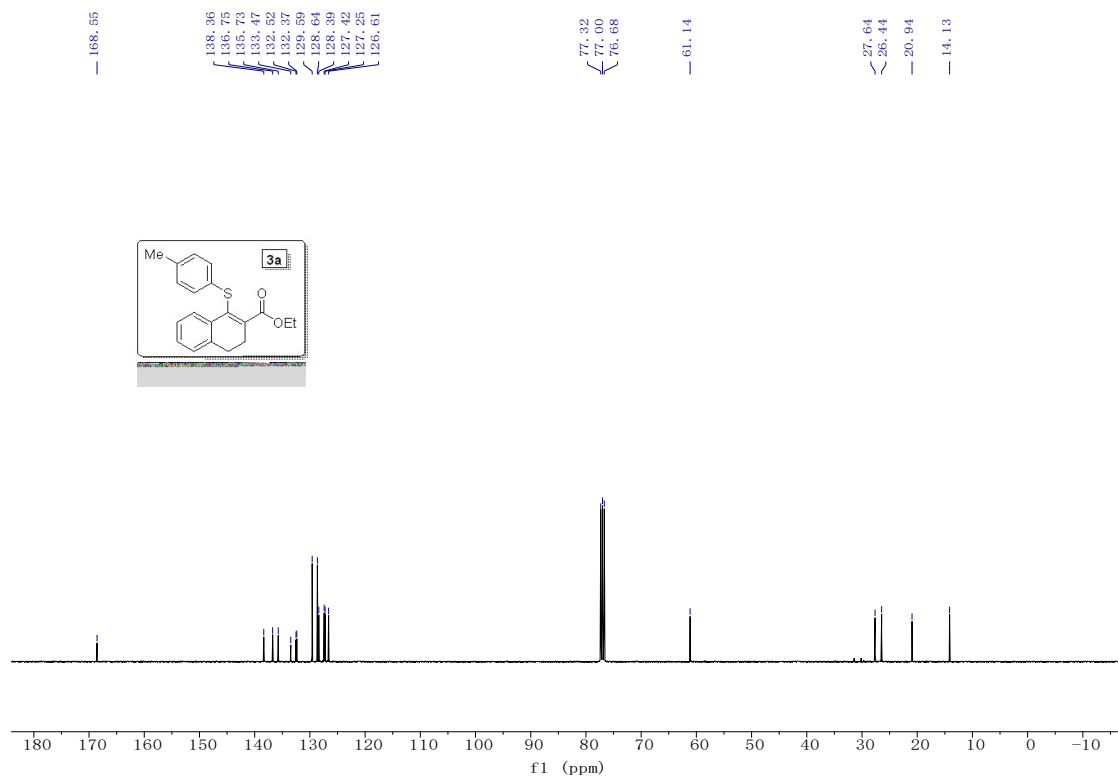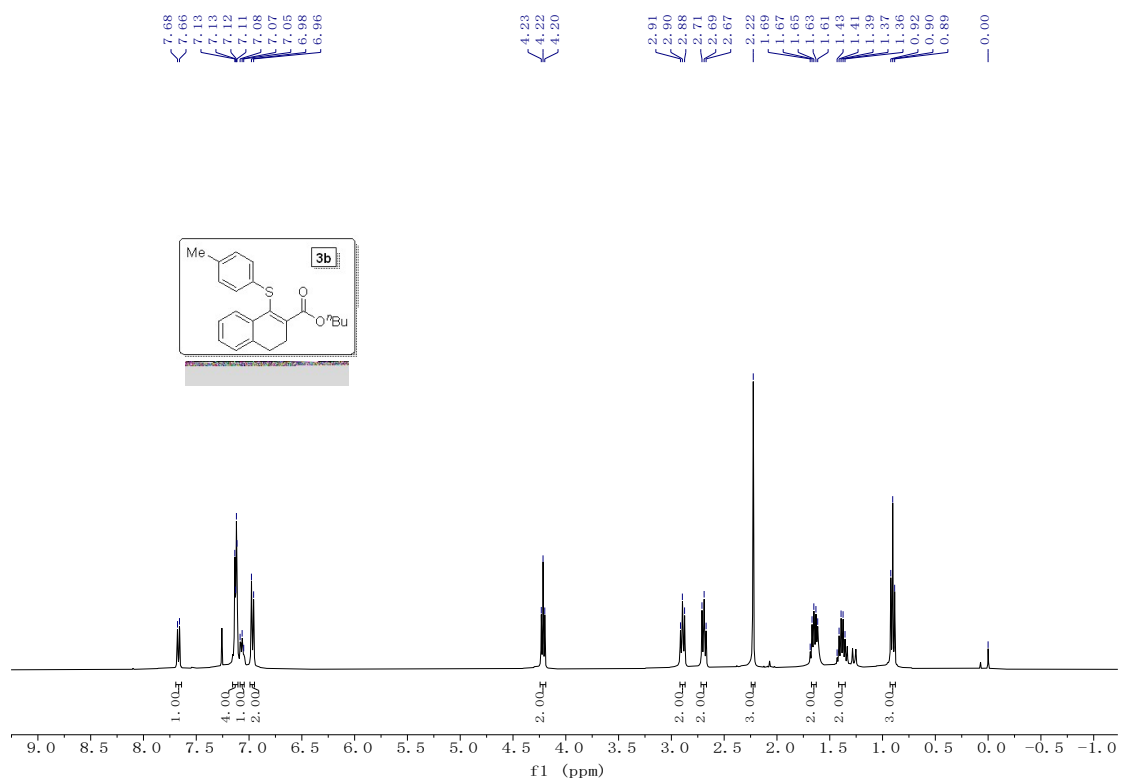

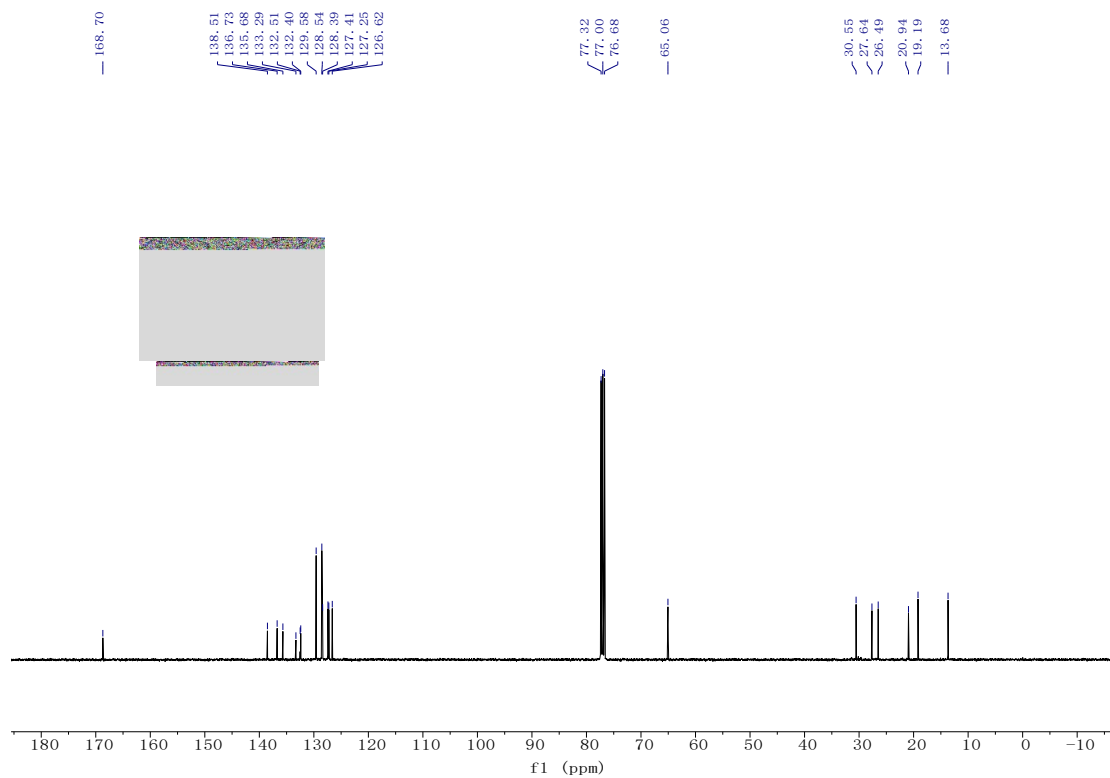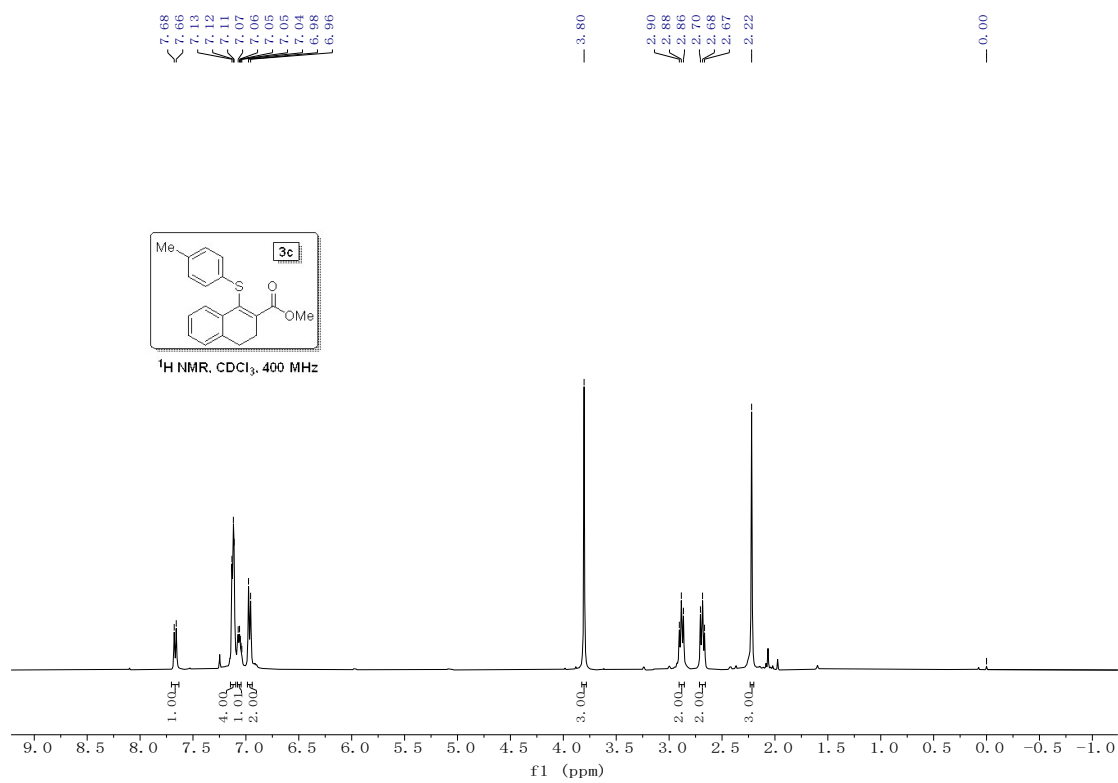

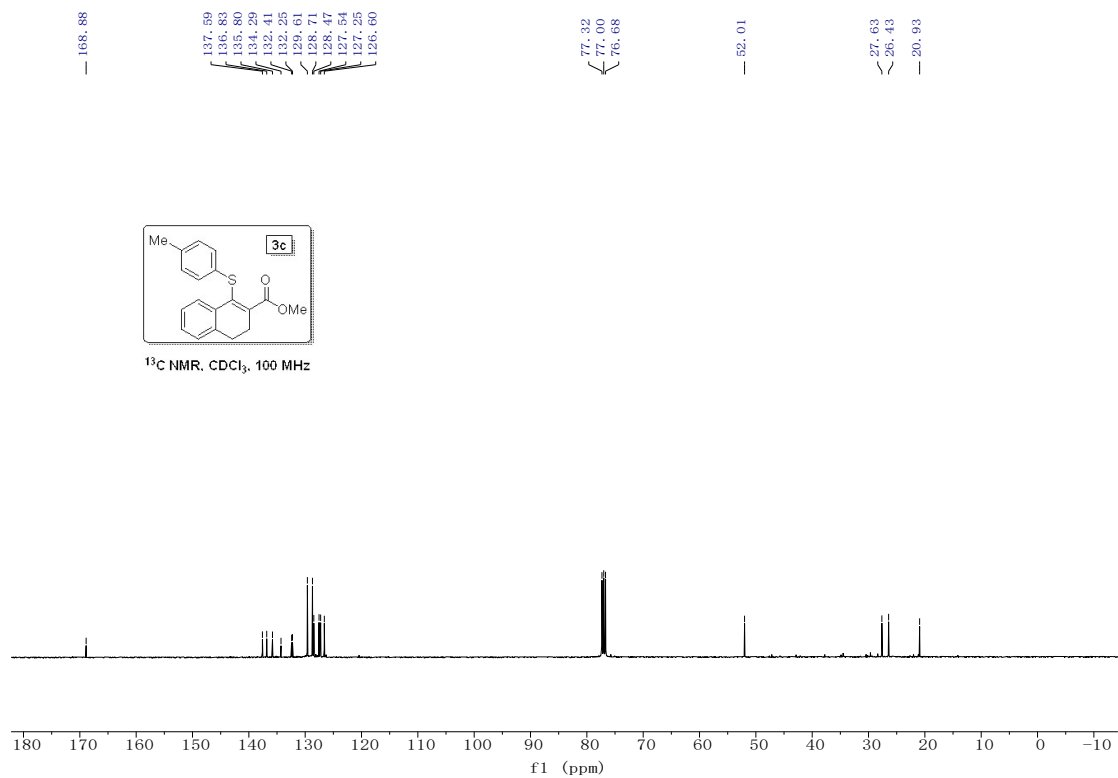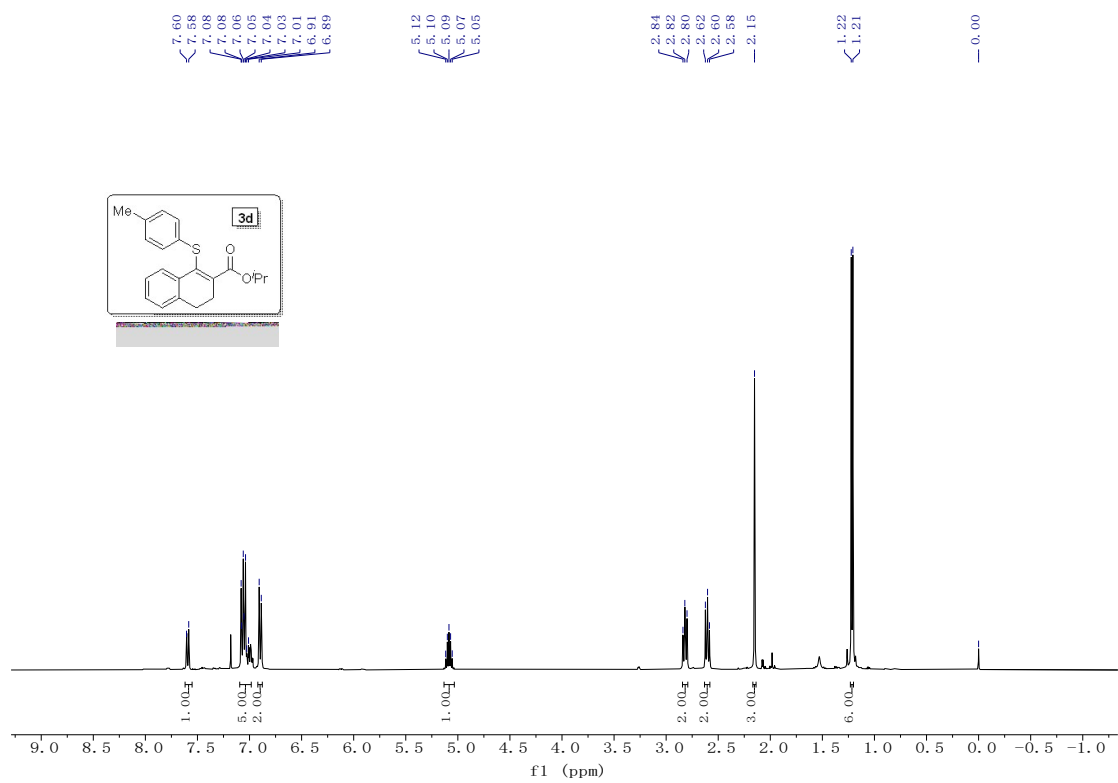

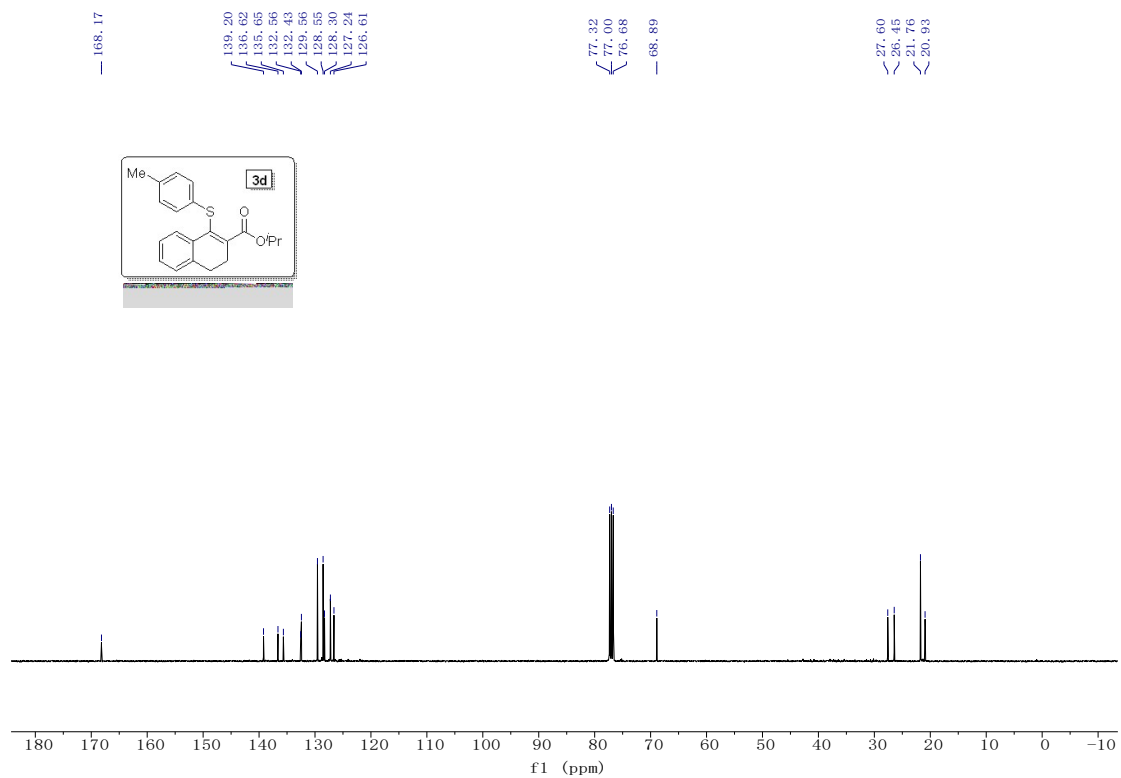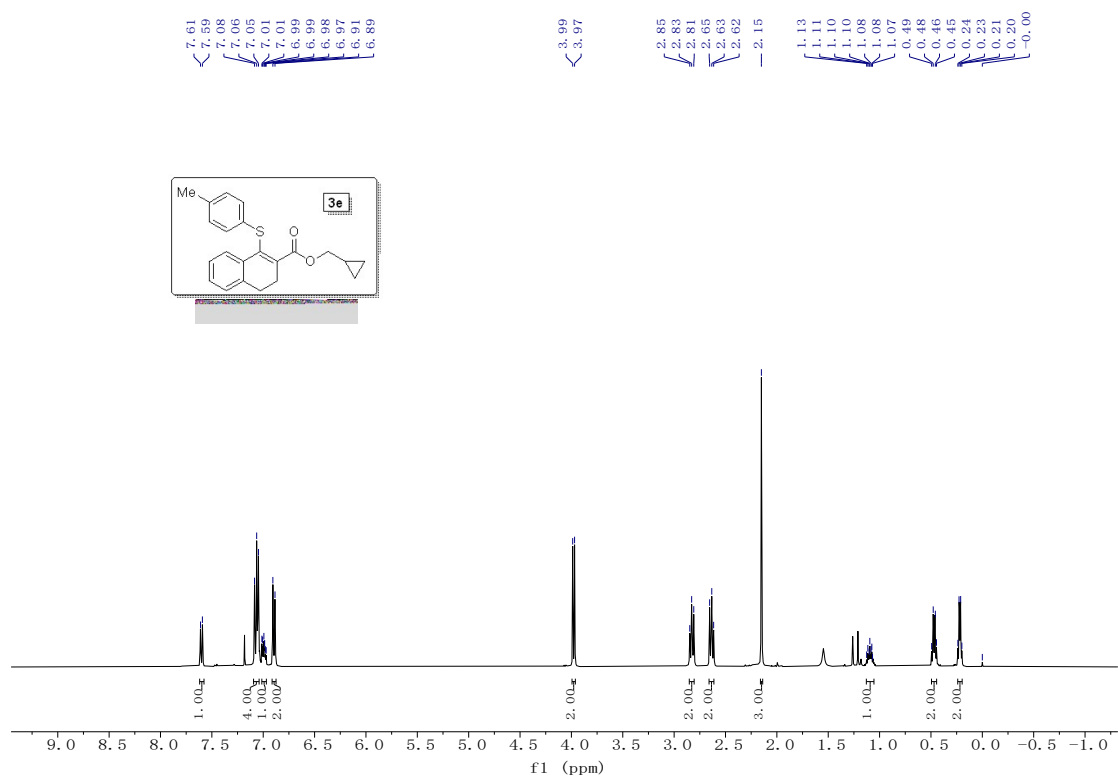

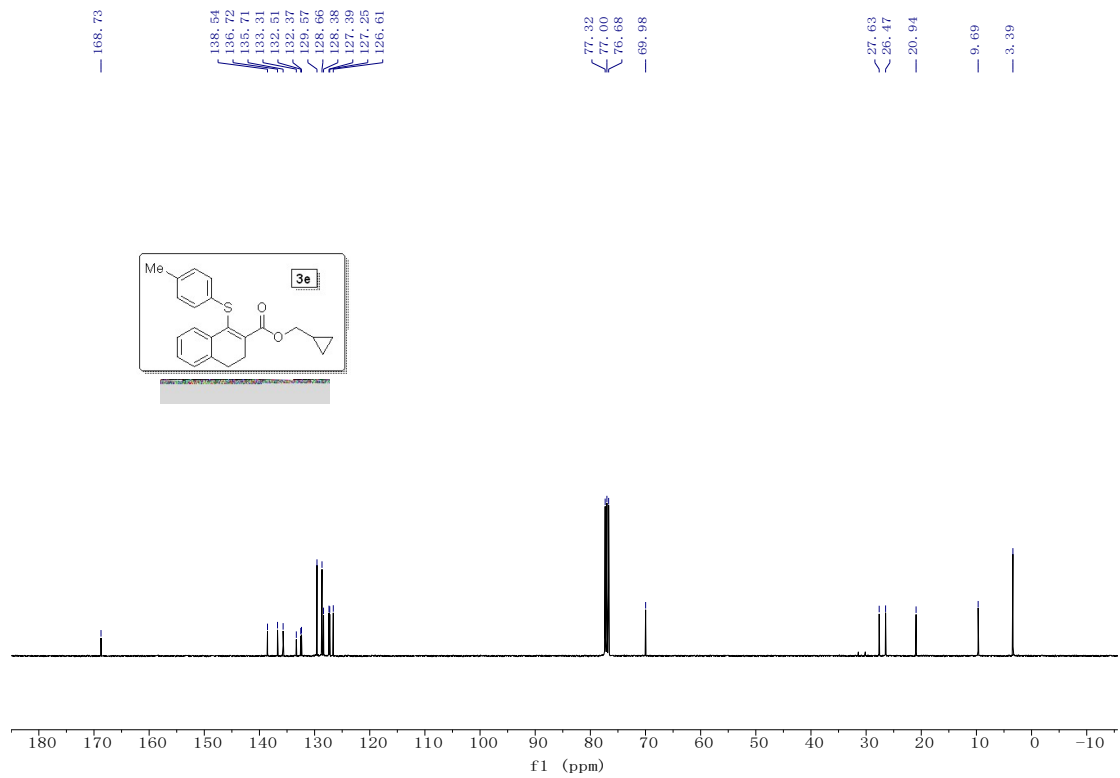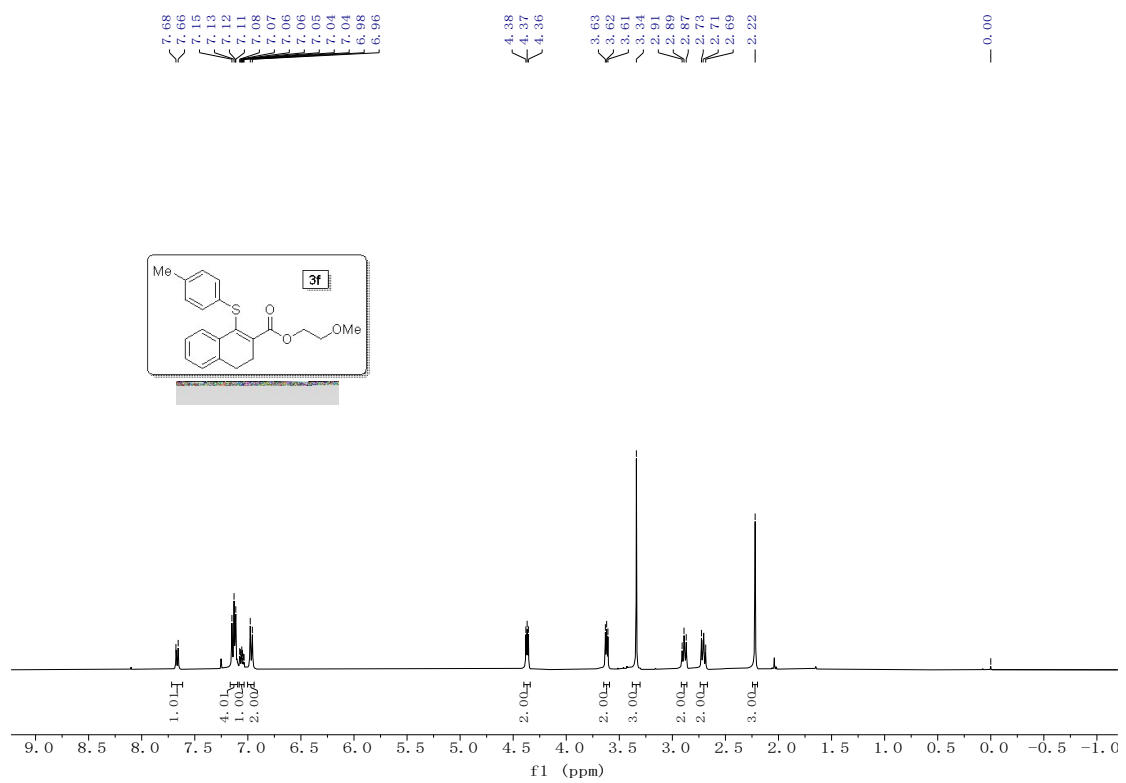

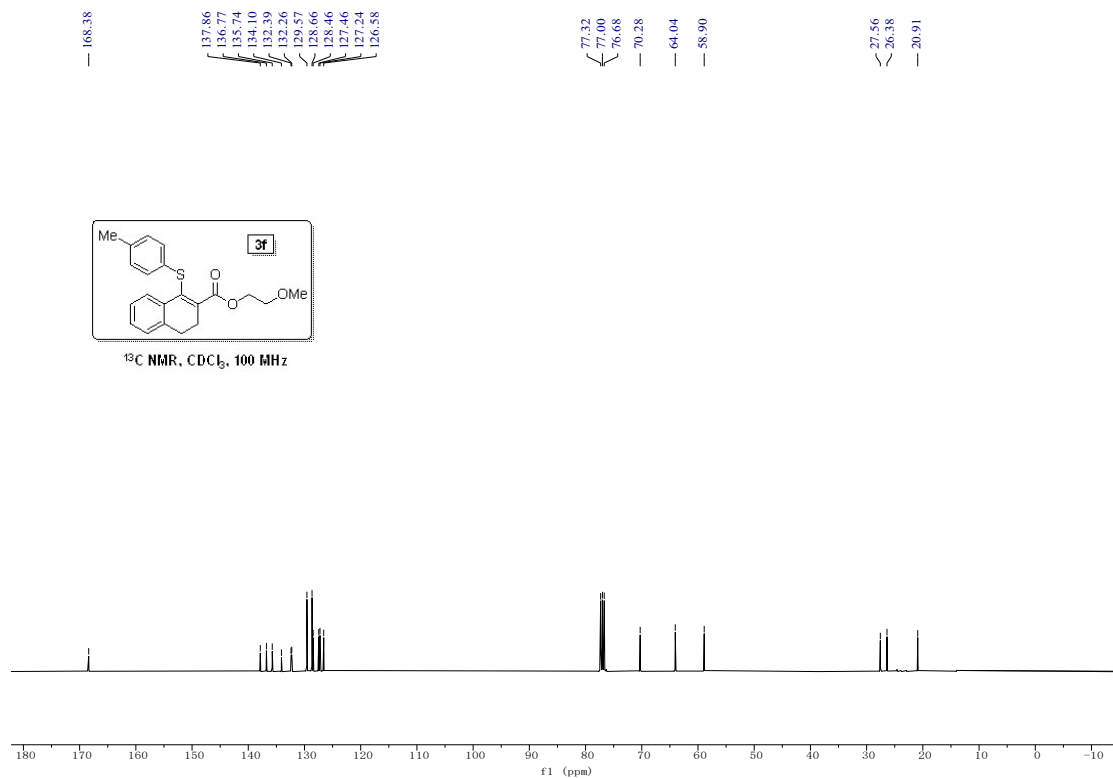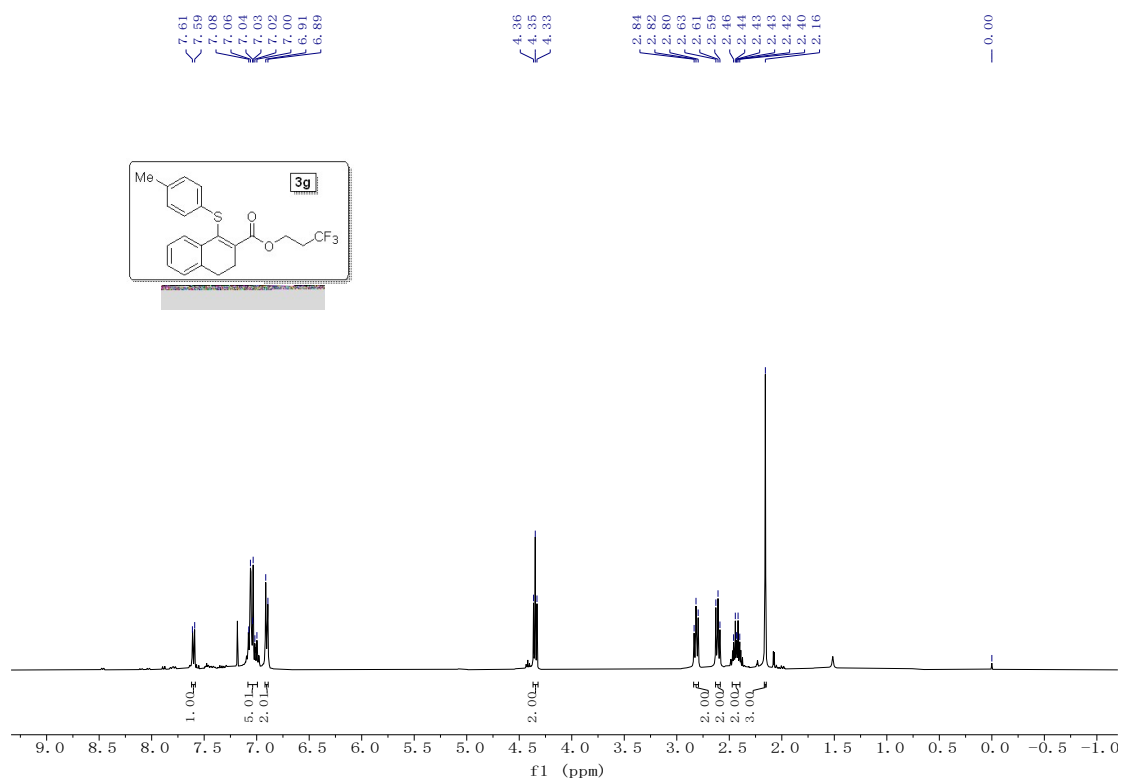

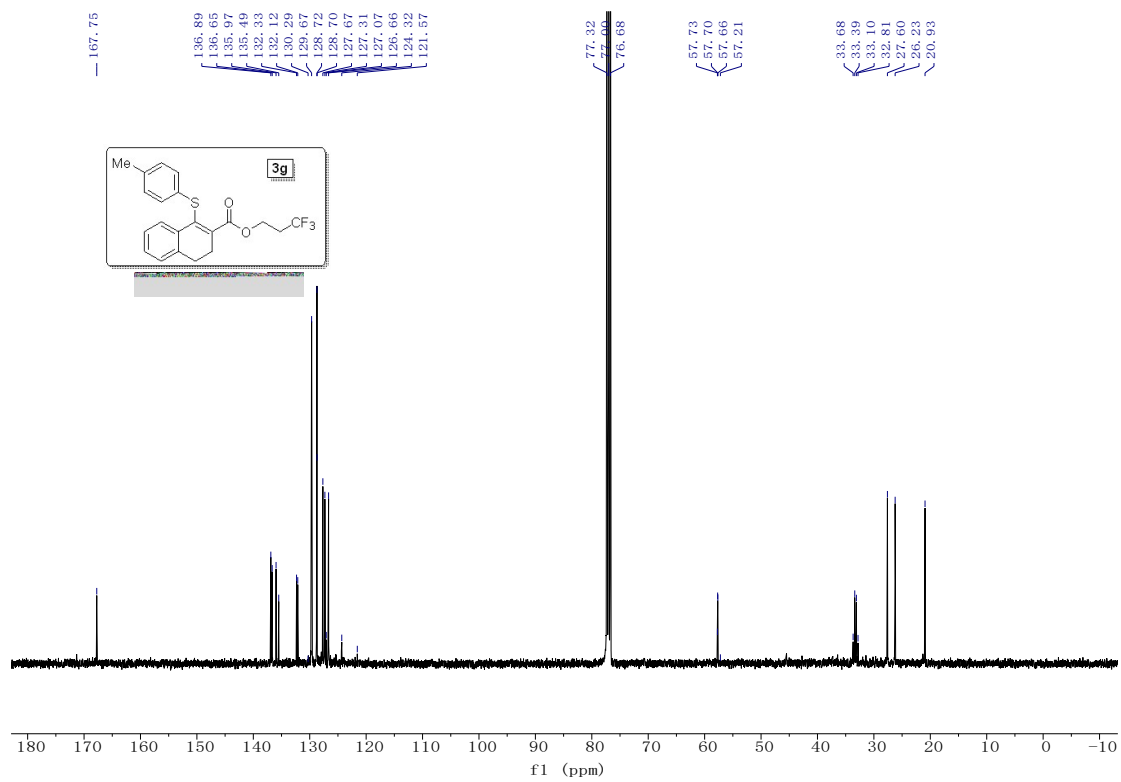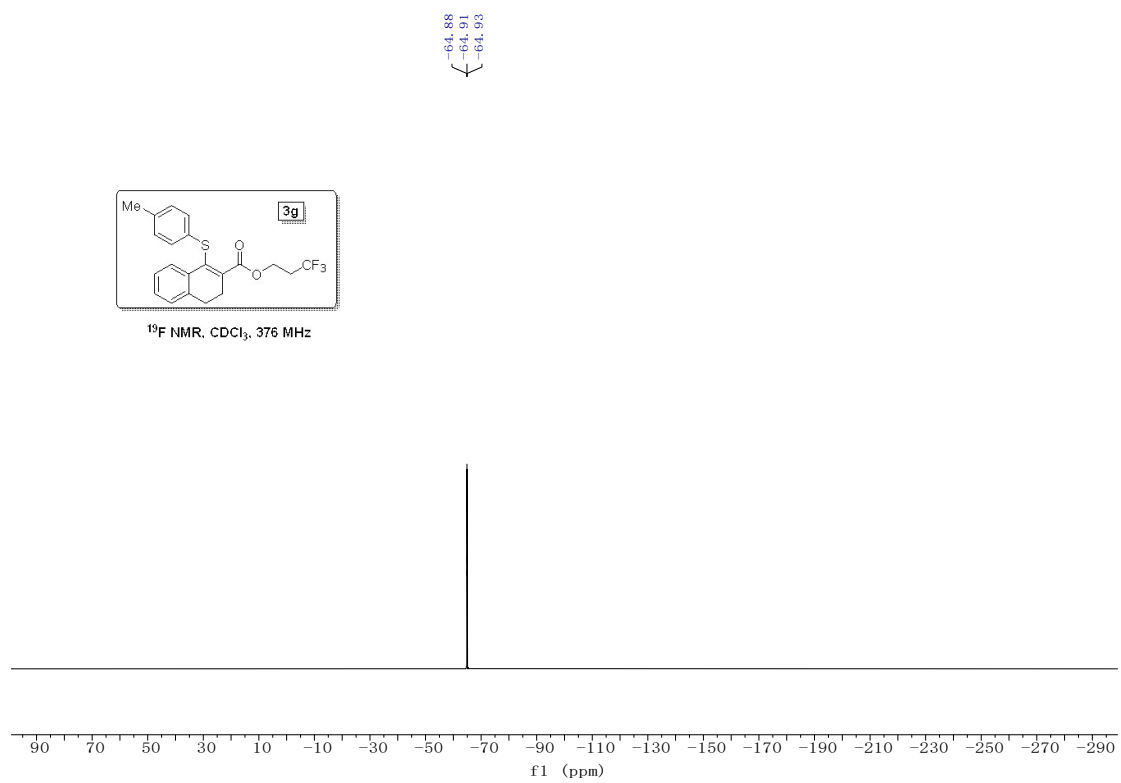



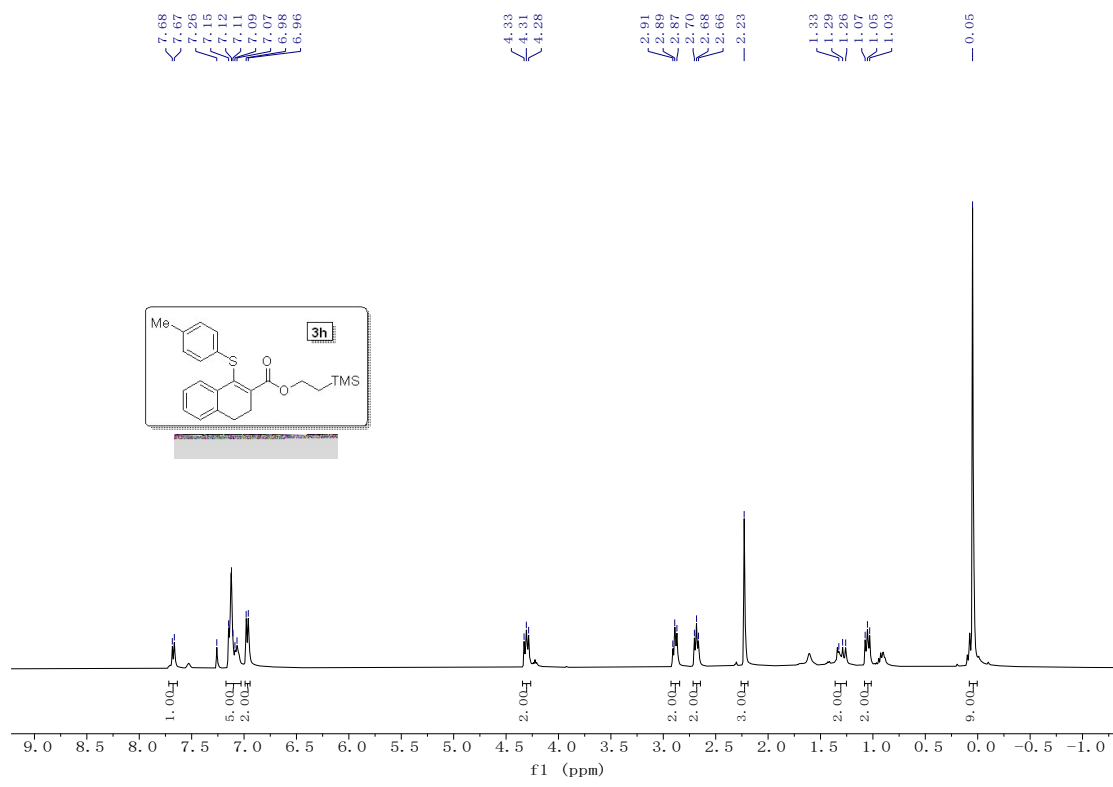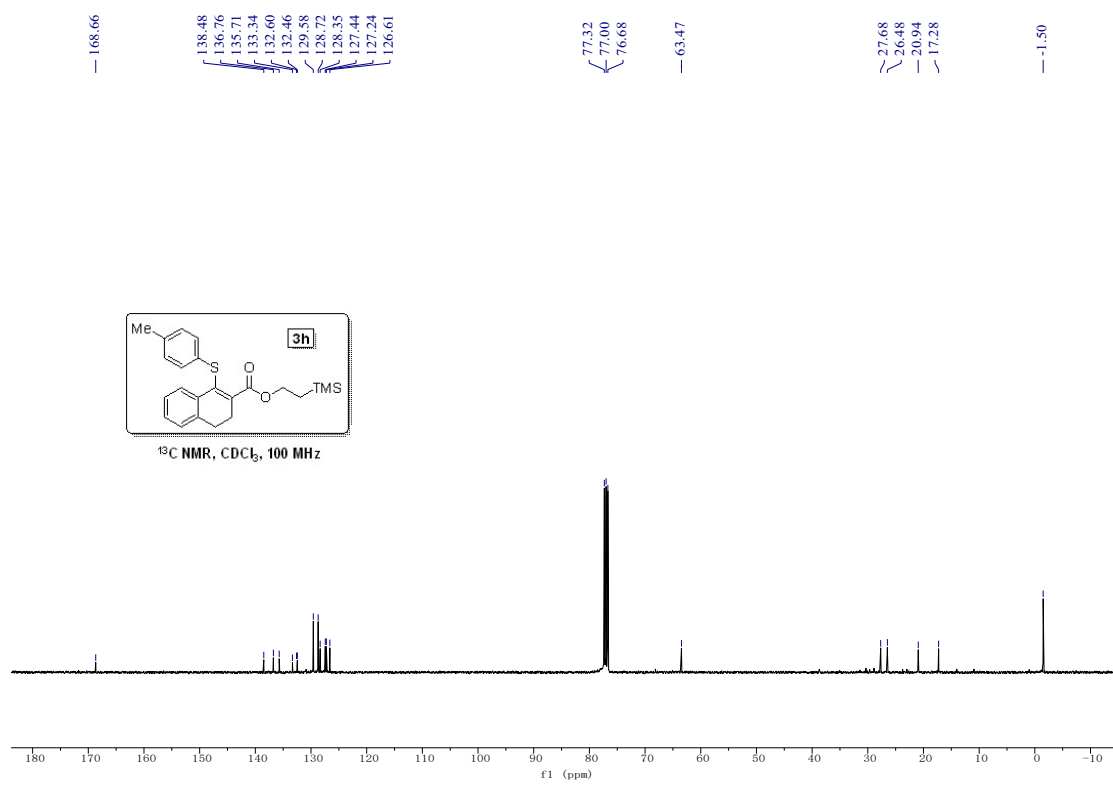

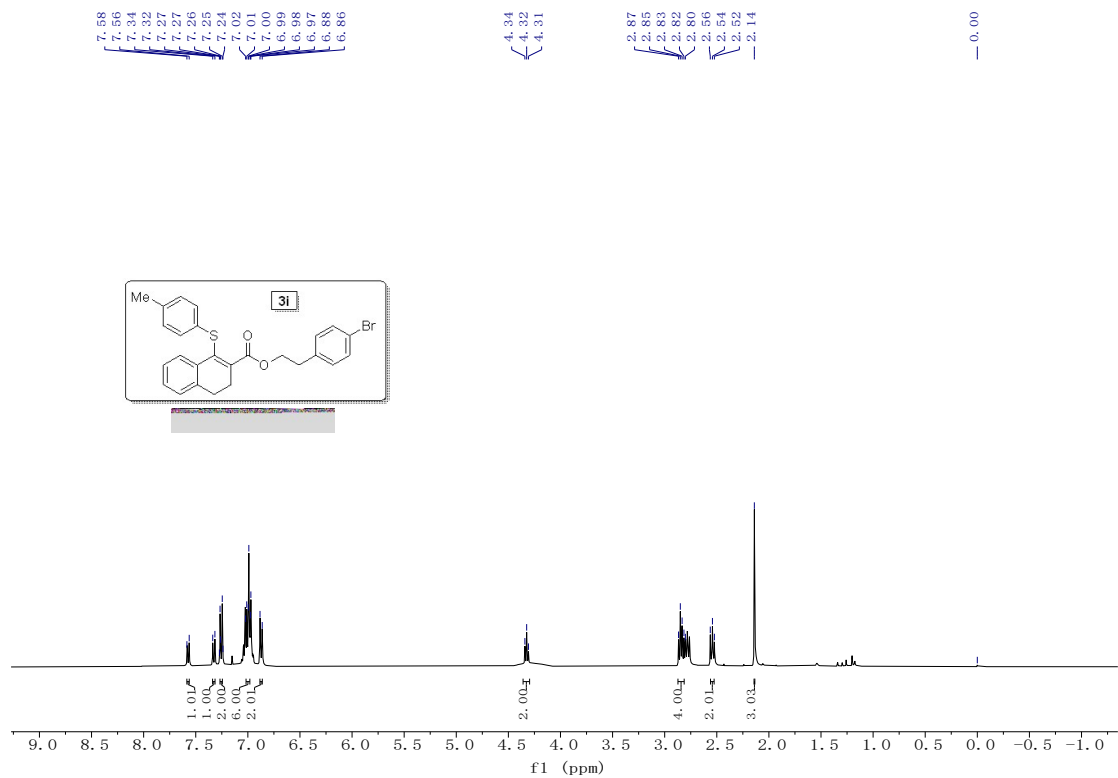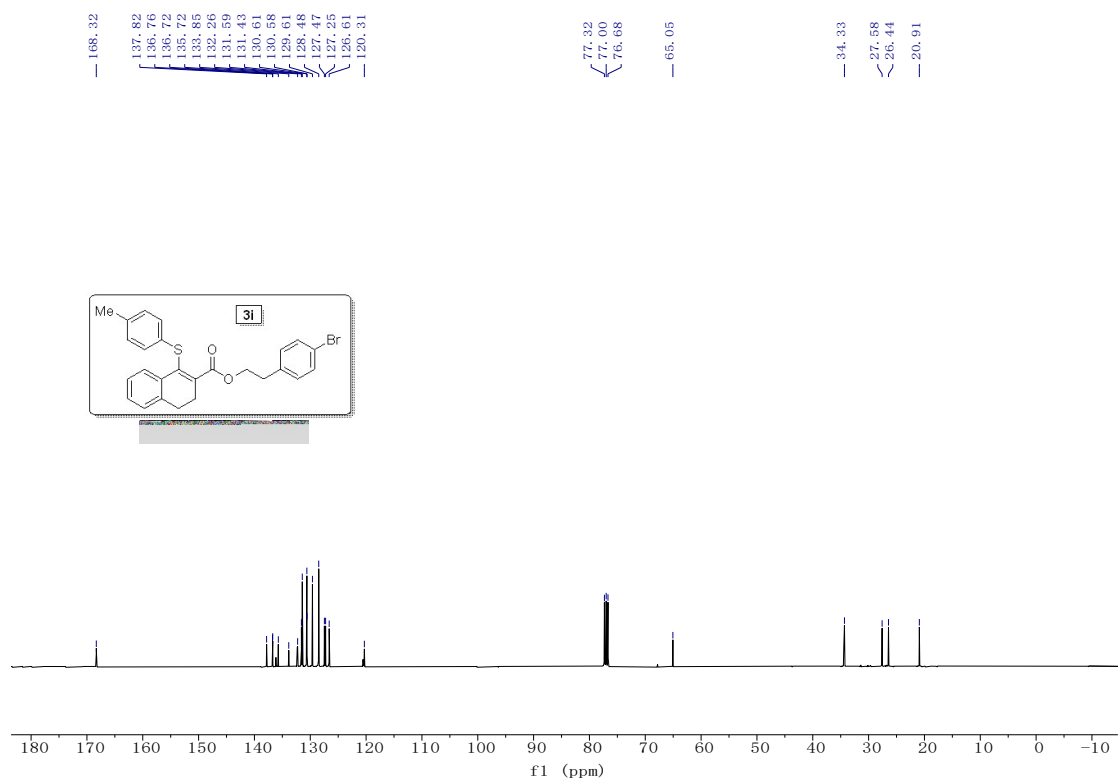

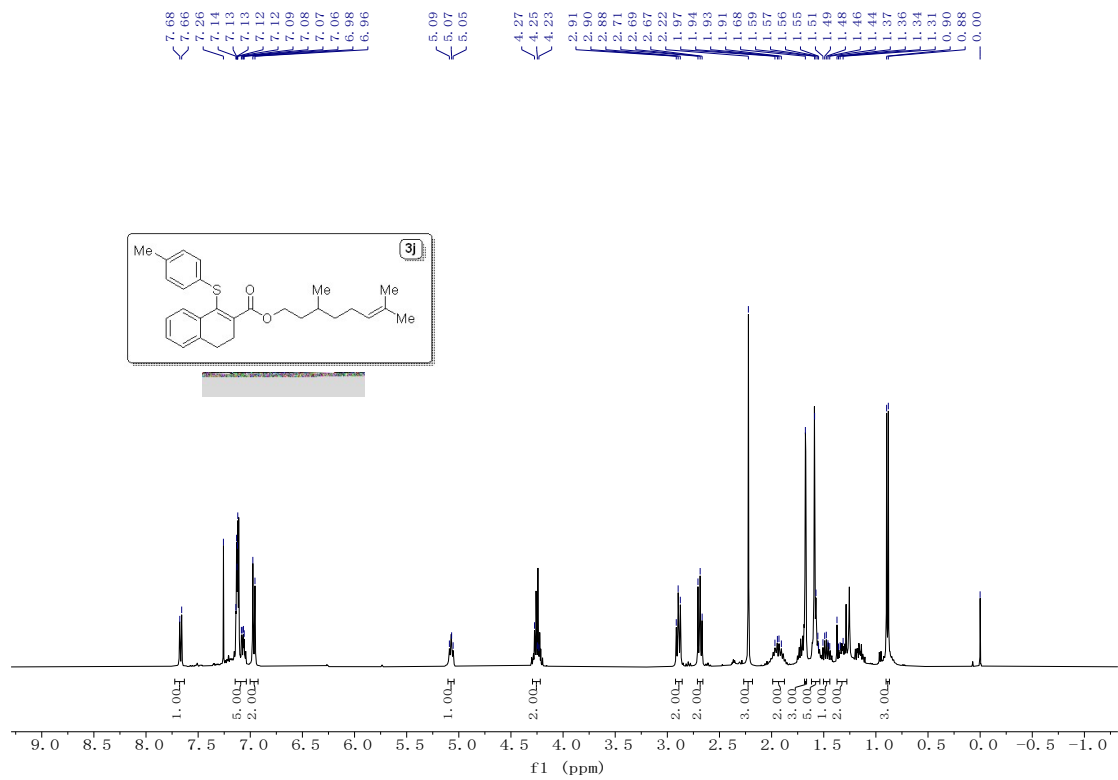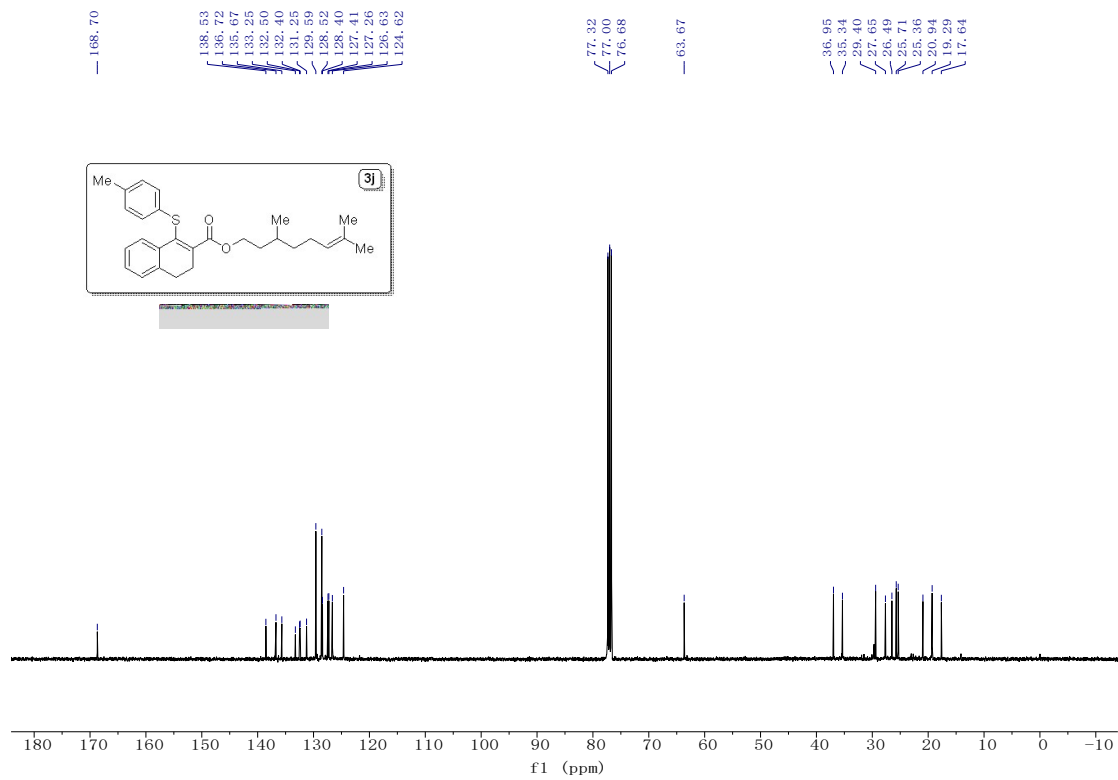

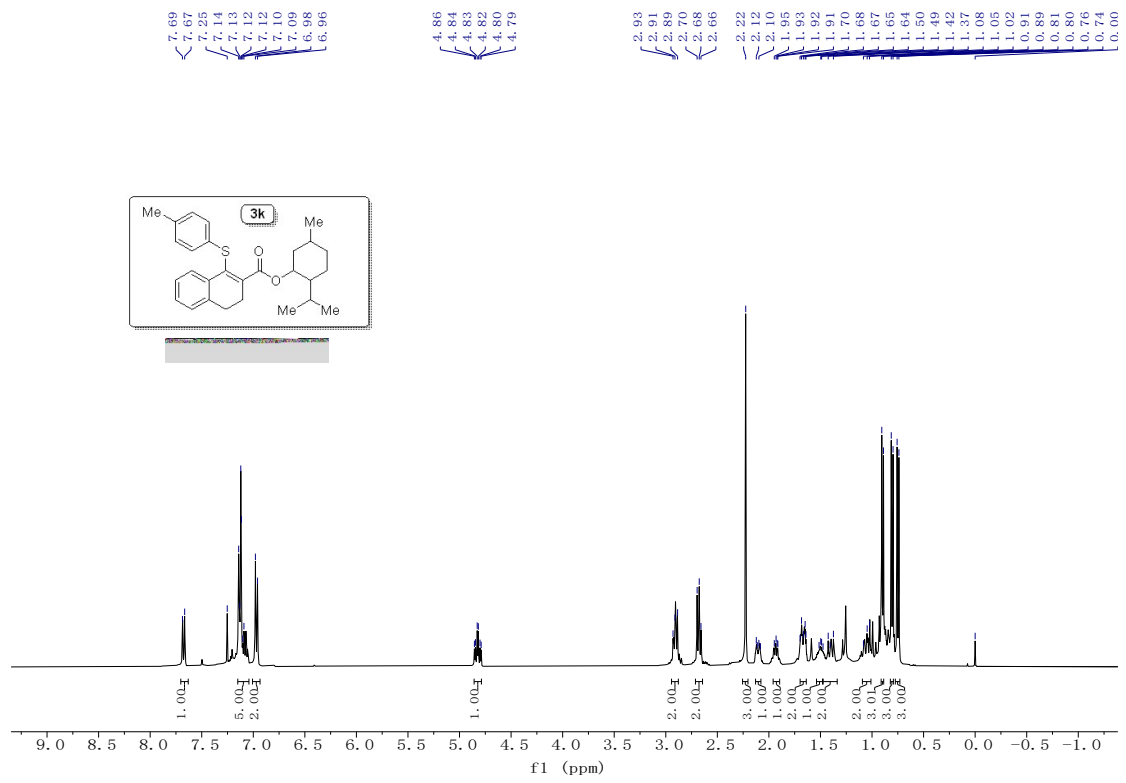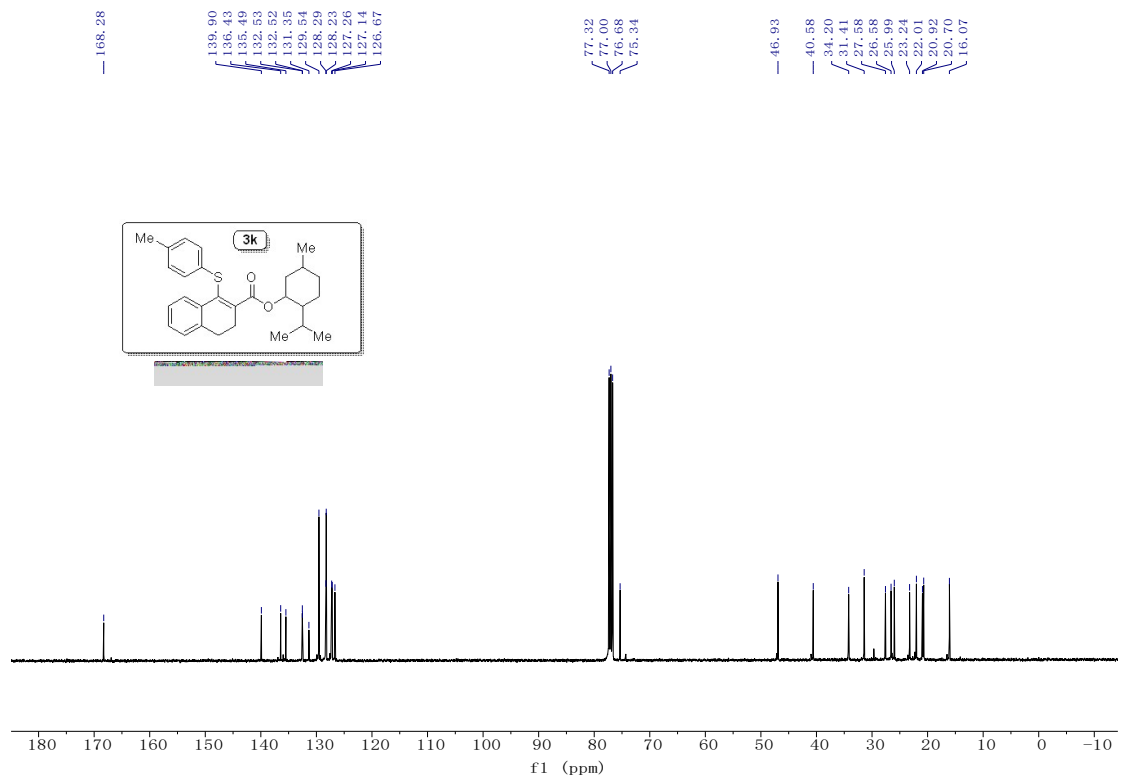

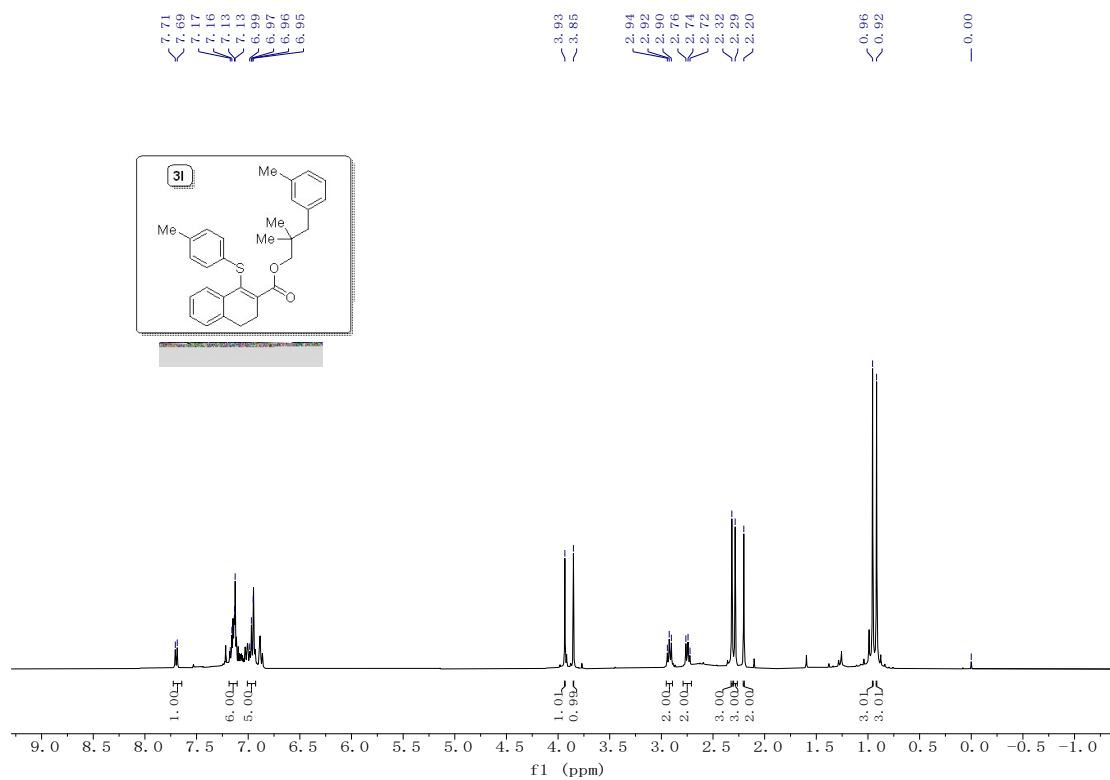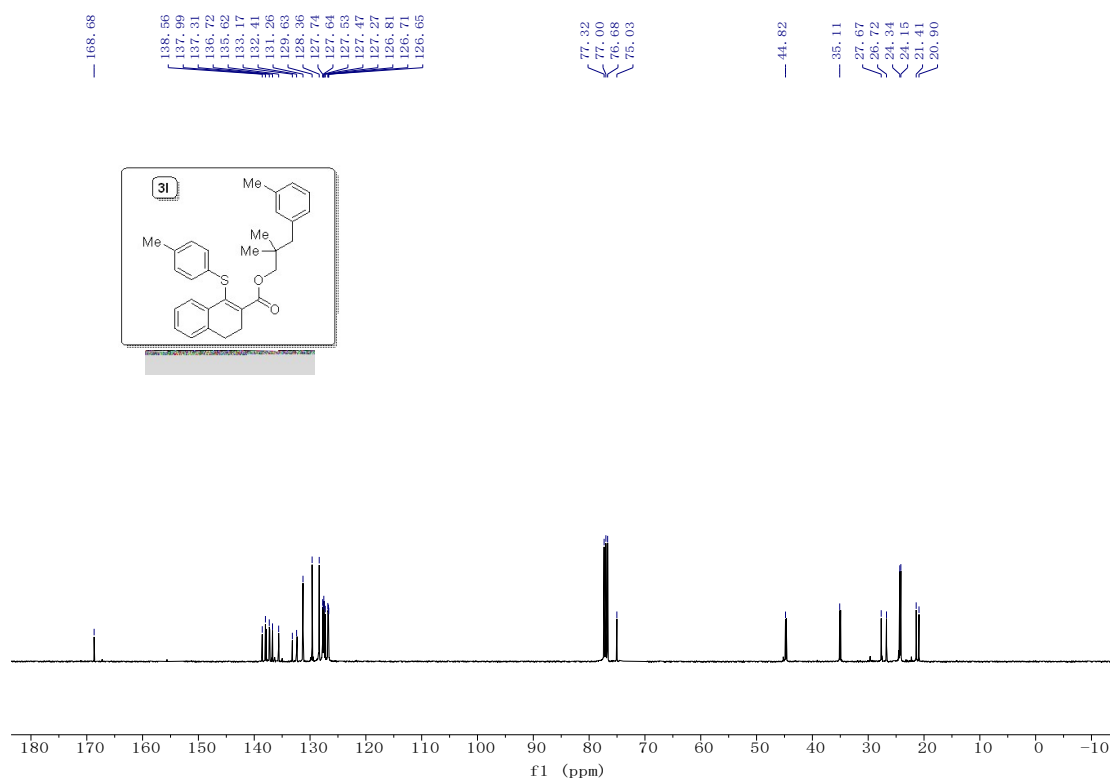

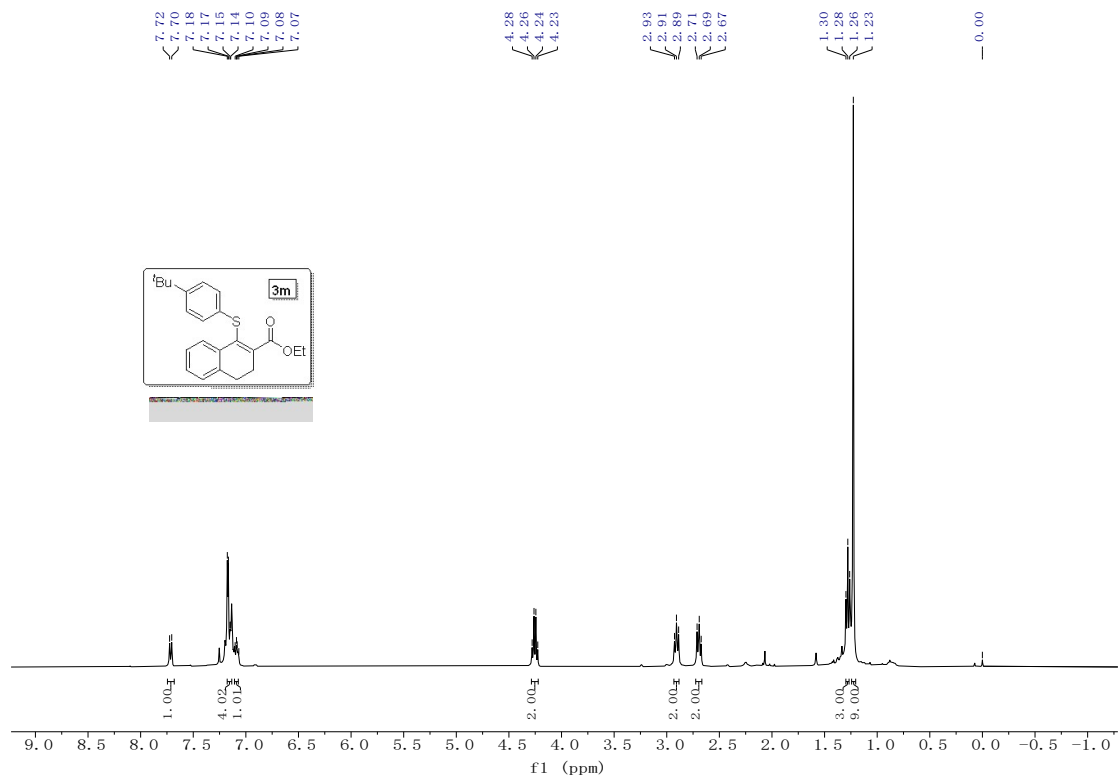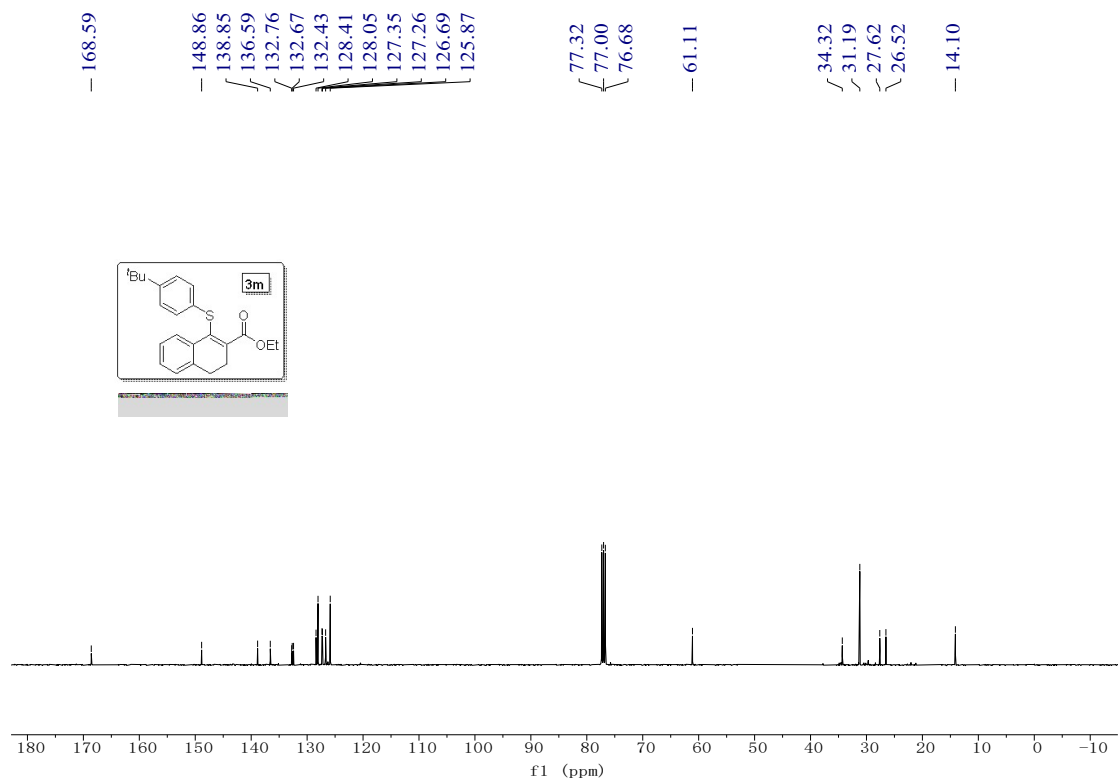

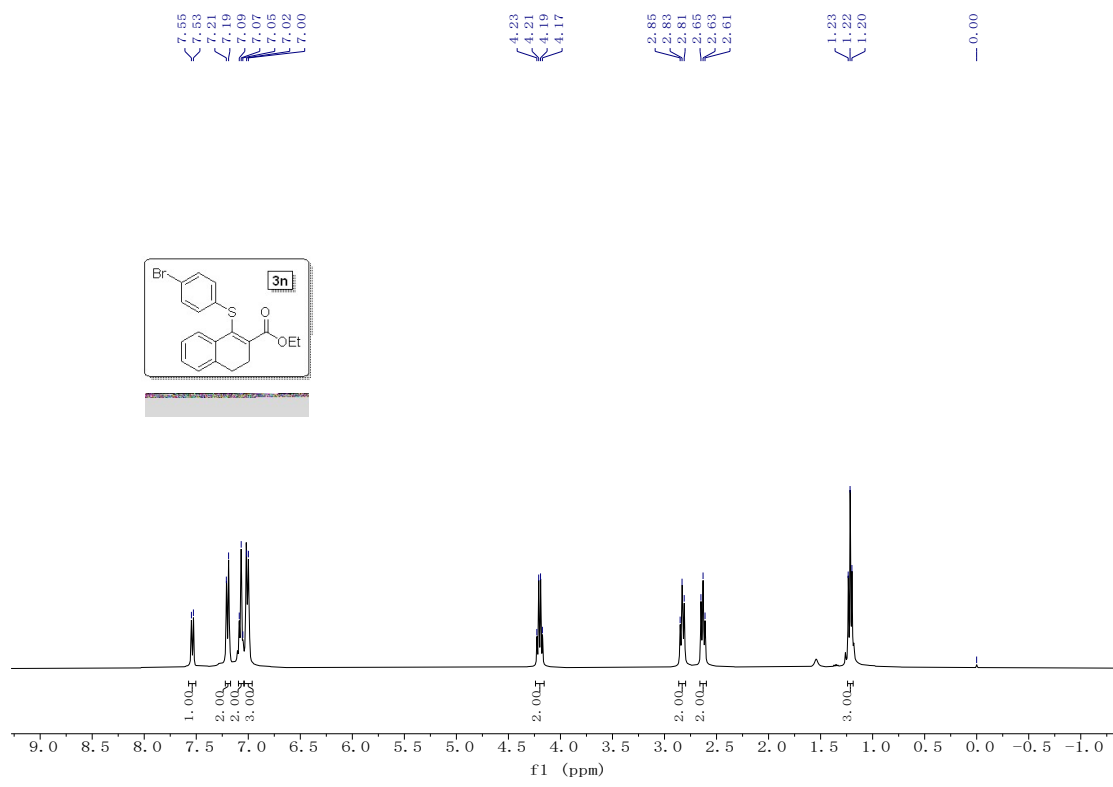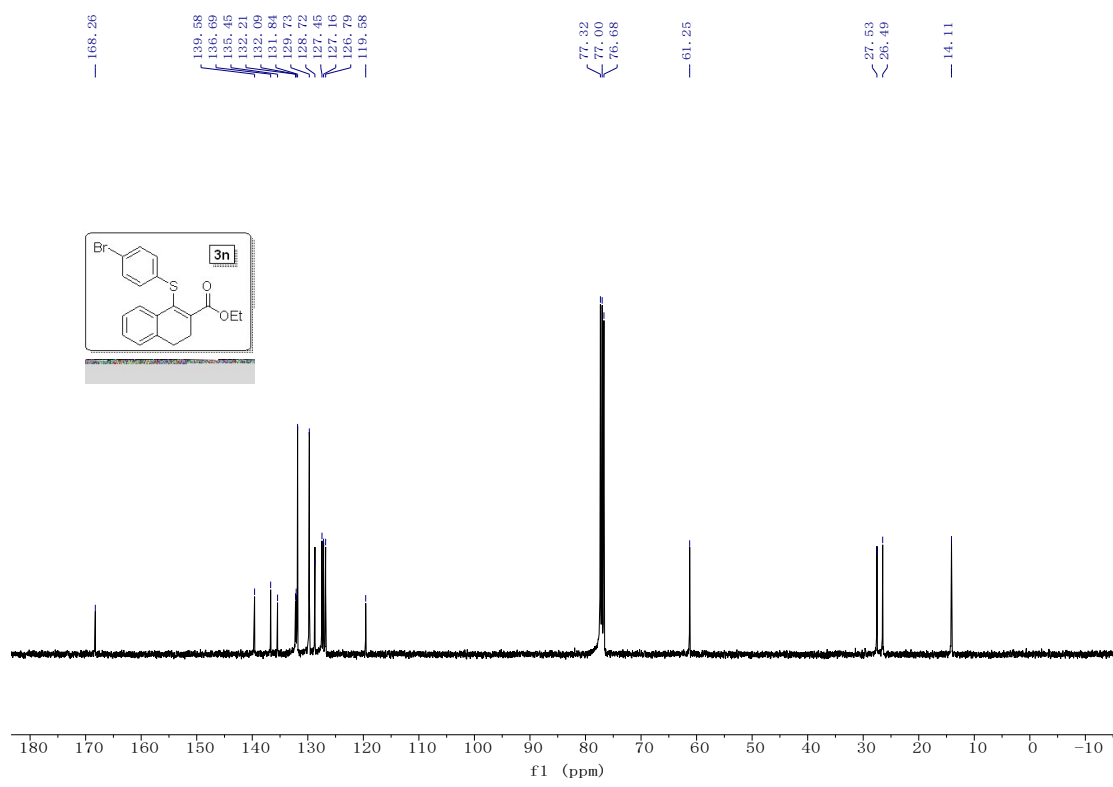

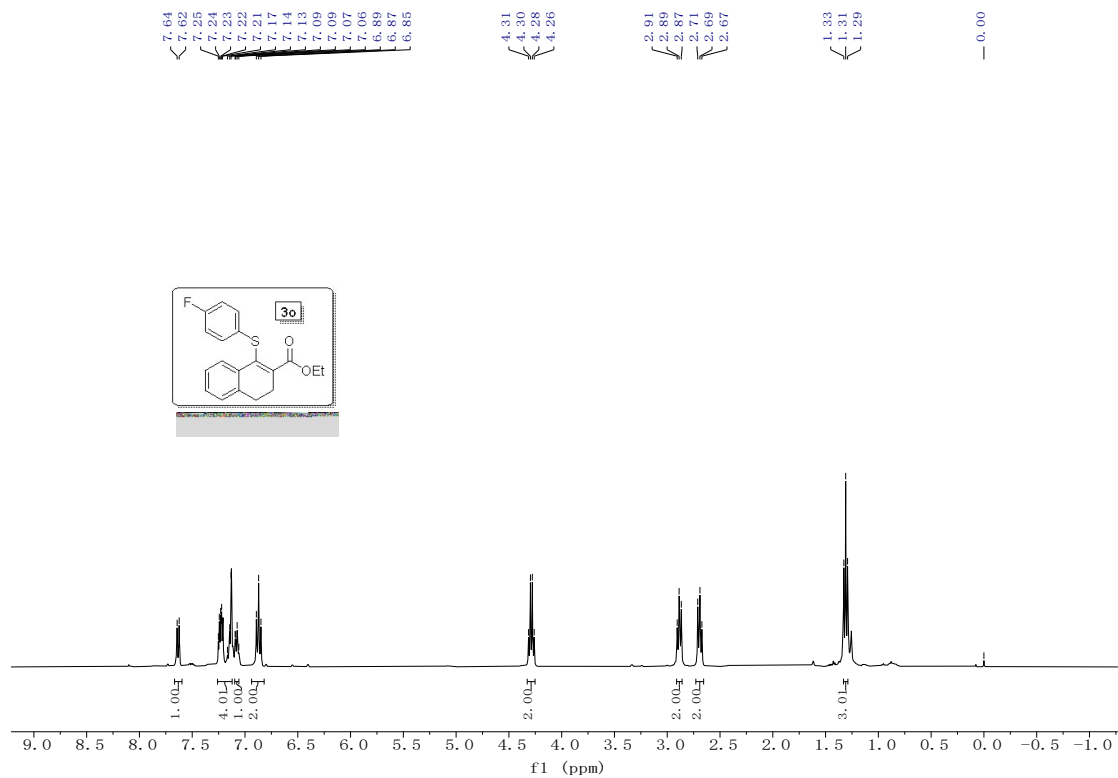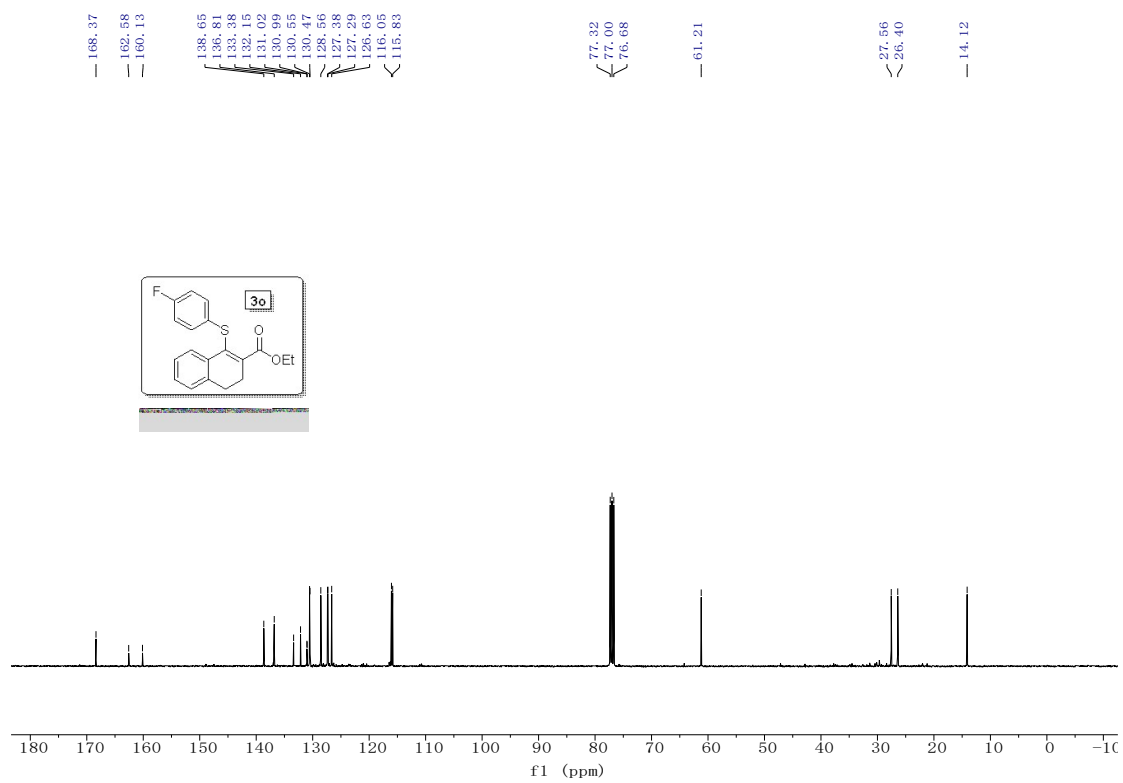



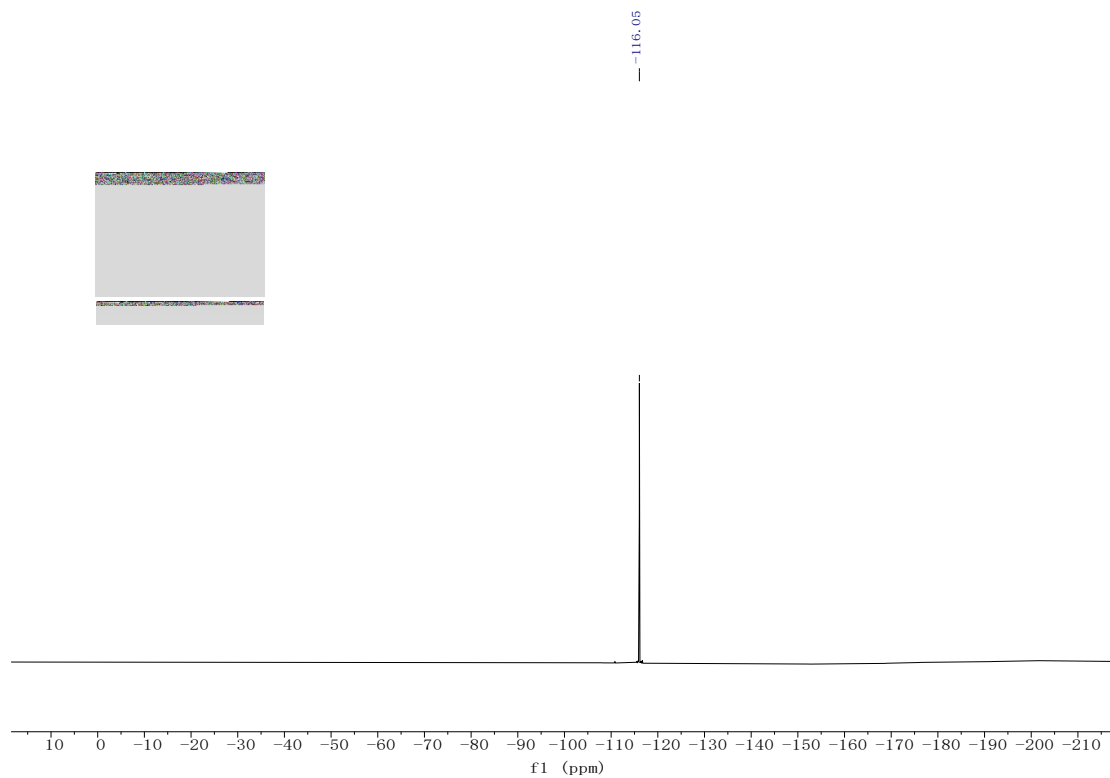

7.62  
7.60  
7.16  
7.14  
7.14  
7.13  
7.11  
7.09  
7.08

4.30  
4.28  
4.26  
4.25

2.92  
2.90  
2.88  
2.72  
2.70  
2.68

1.31  
1.29  
1.27

0.00

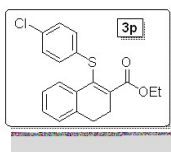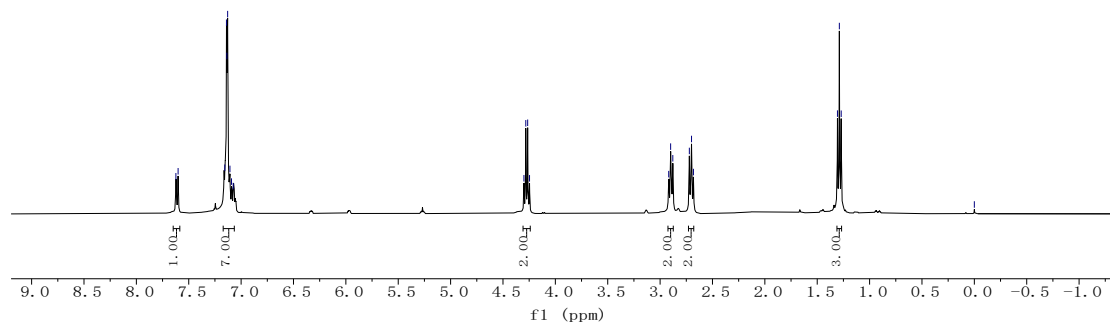

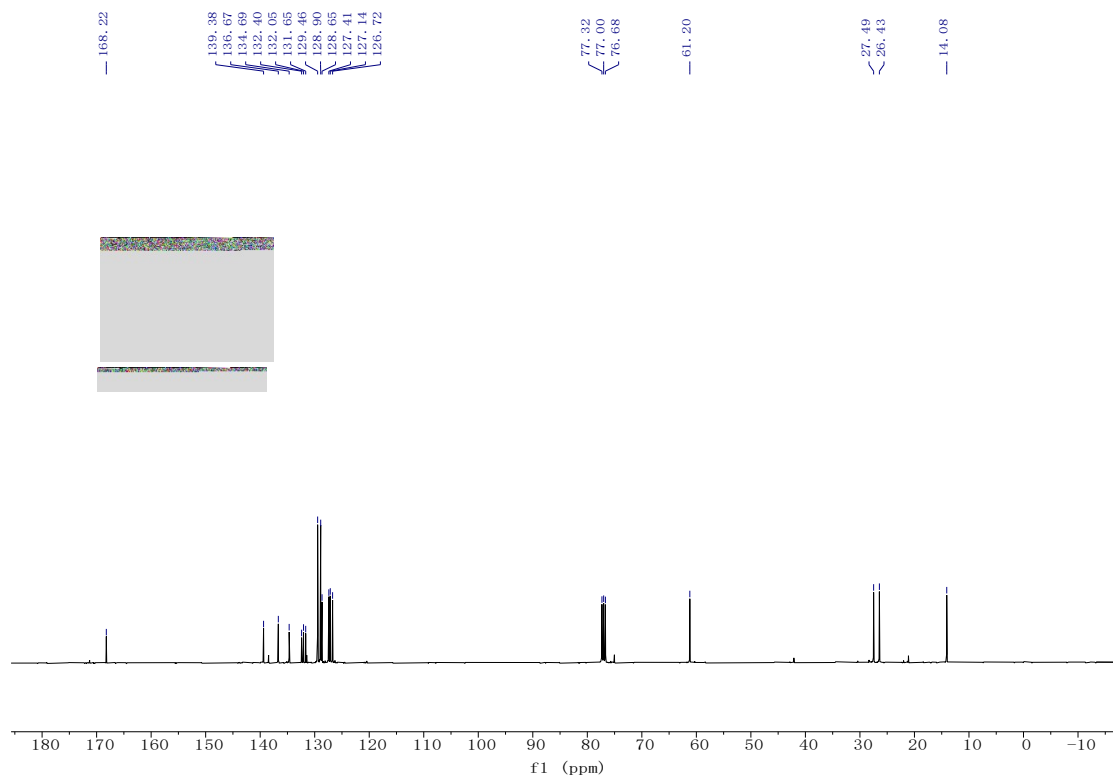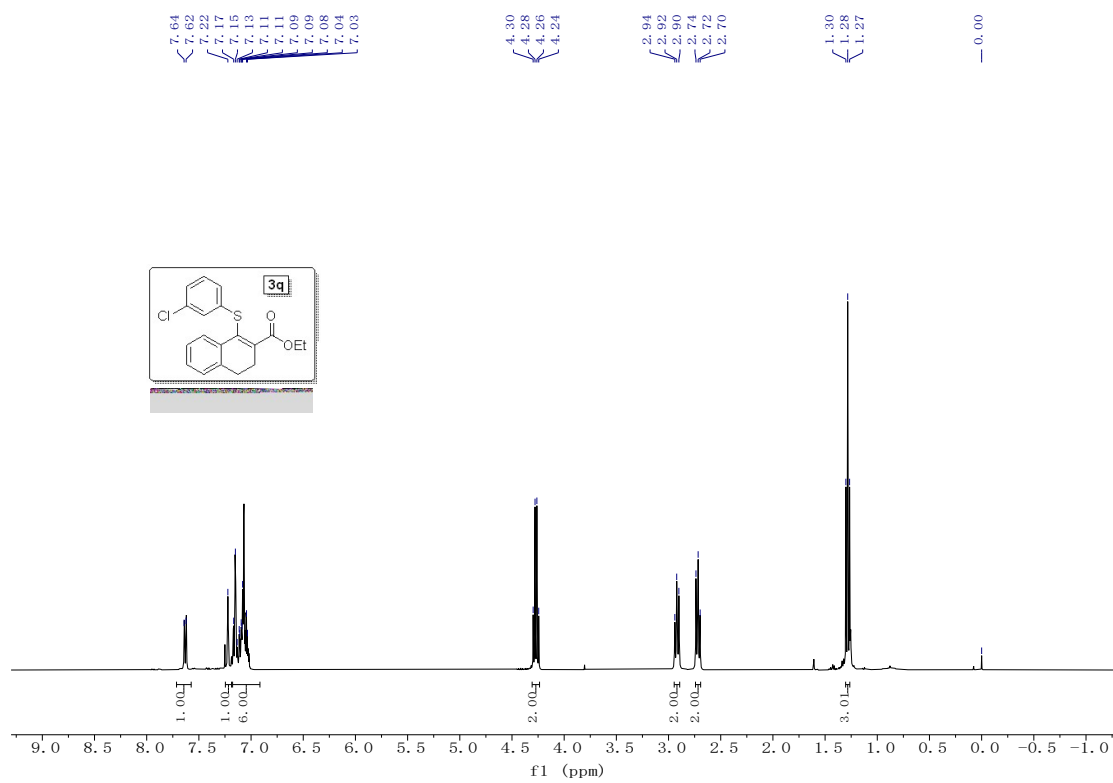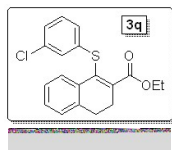

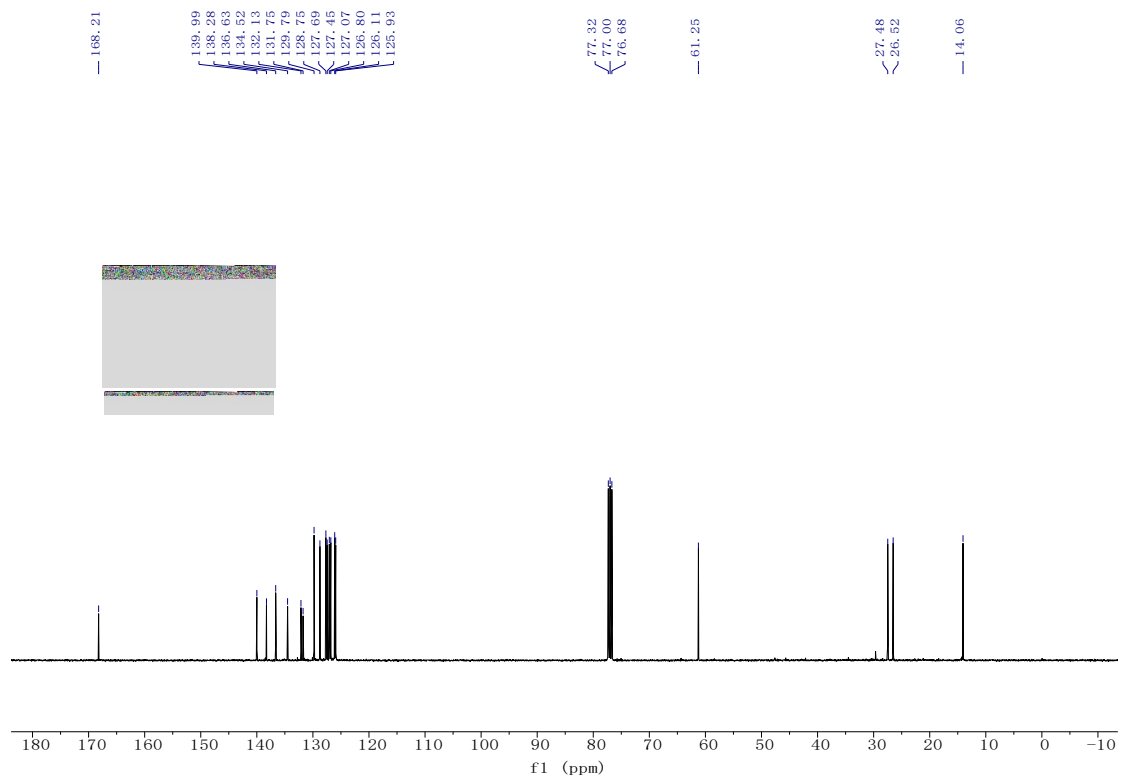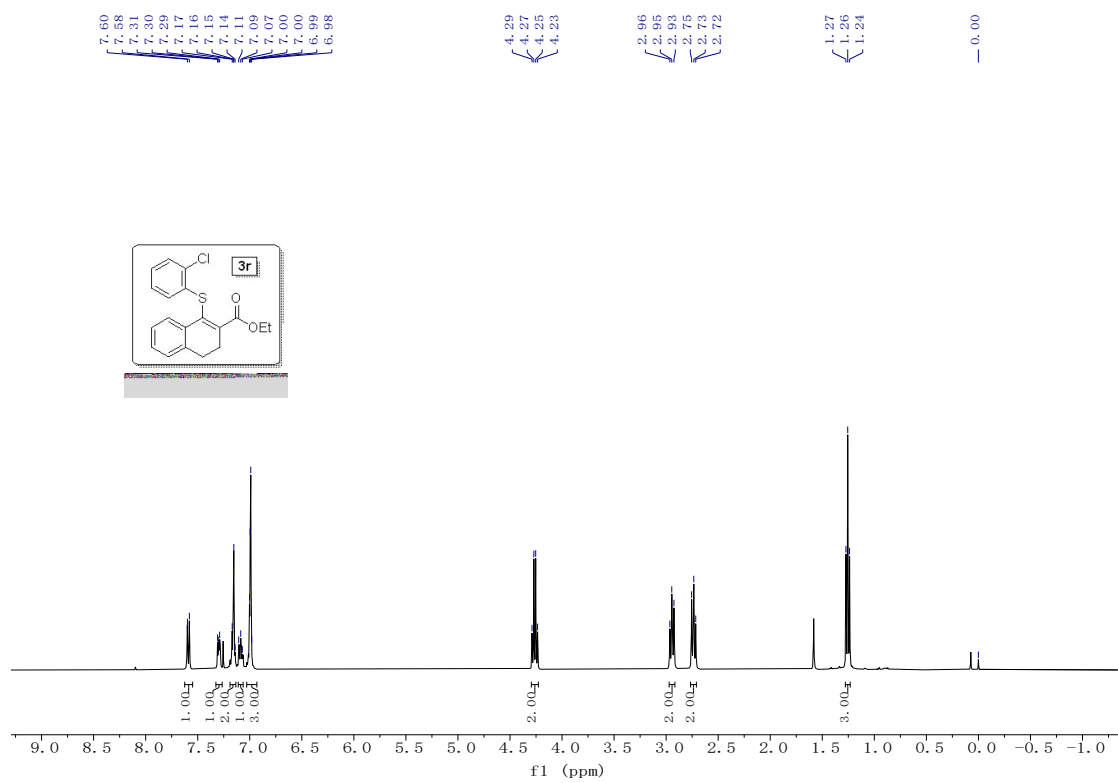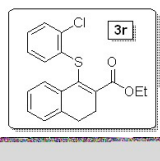

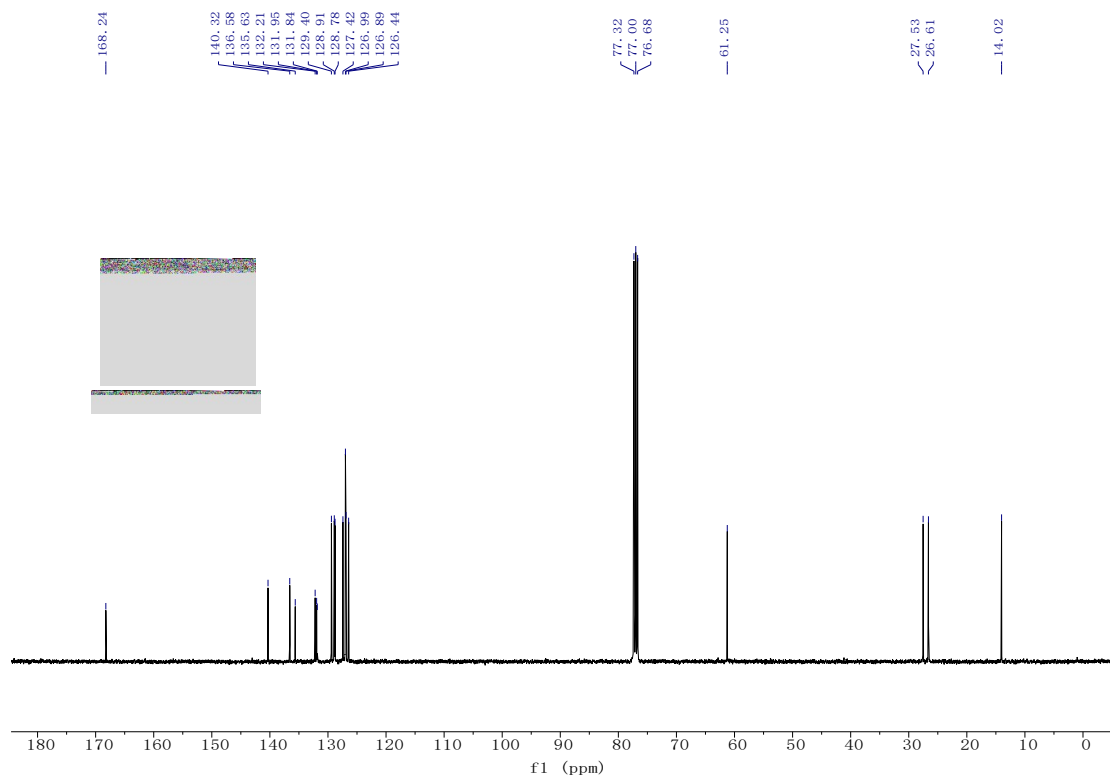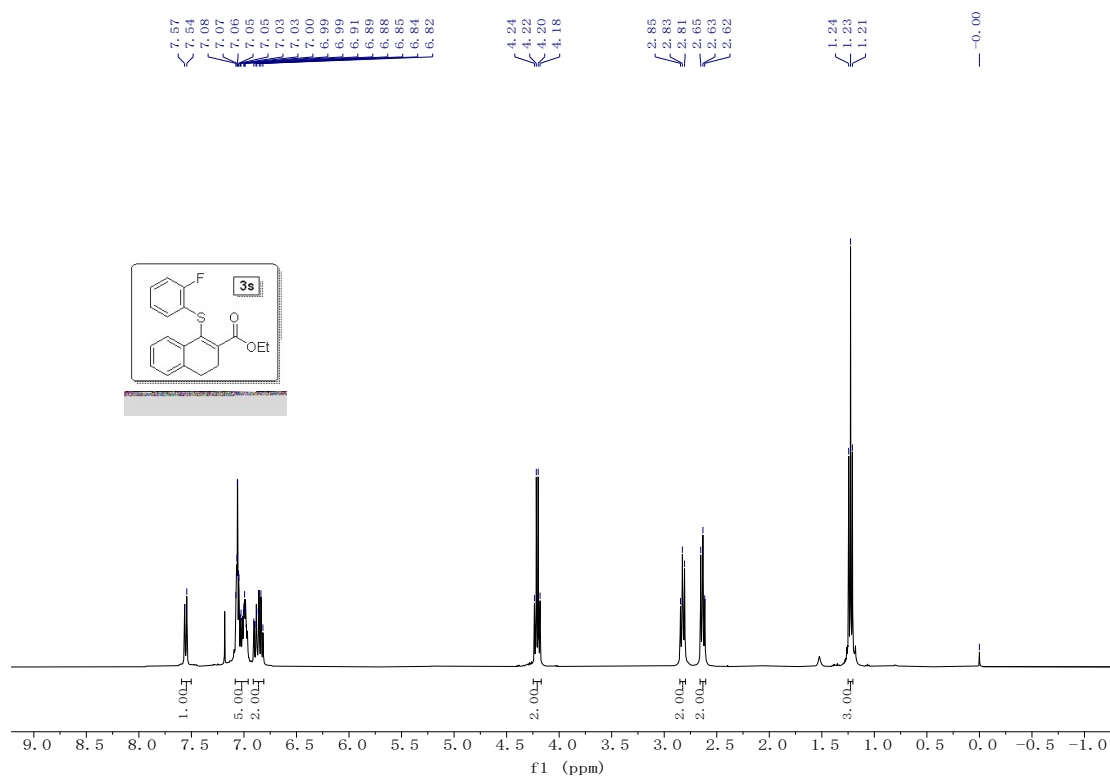

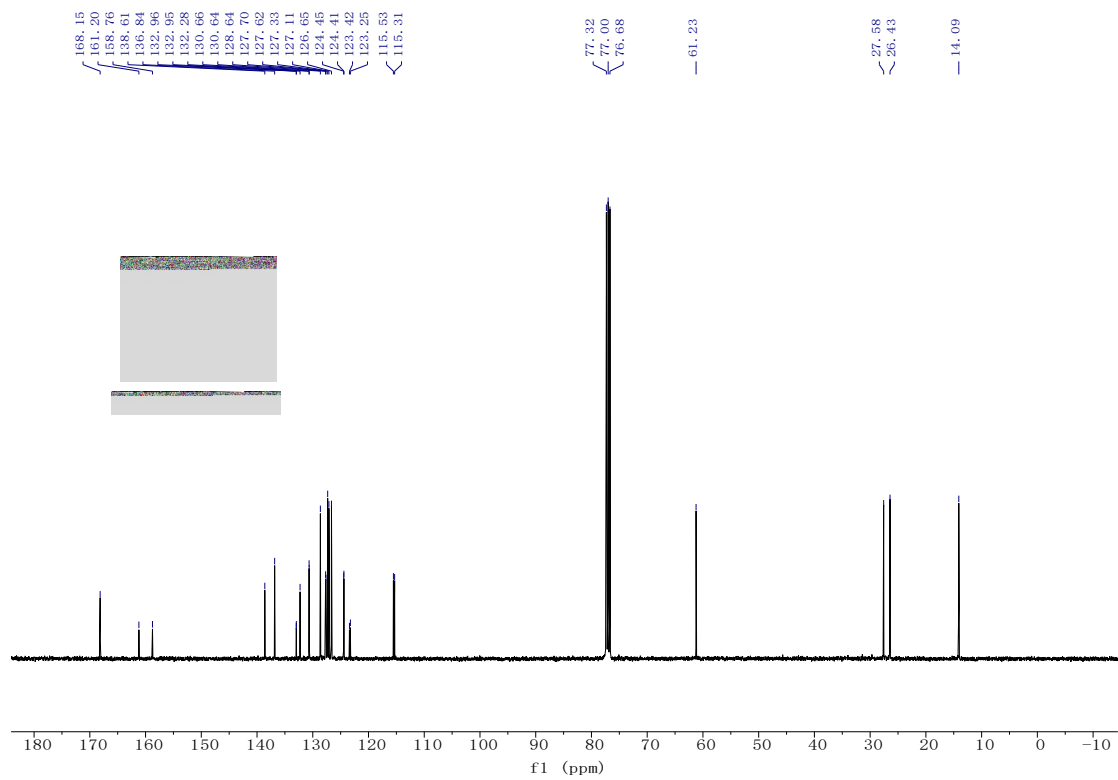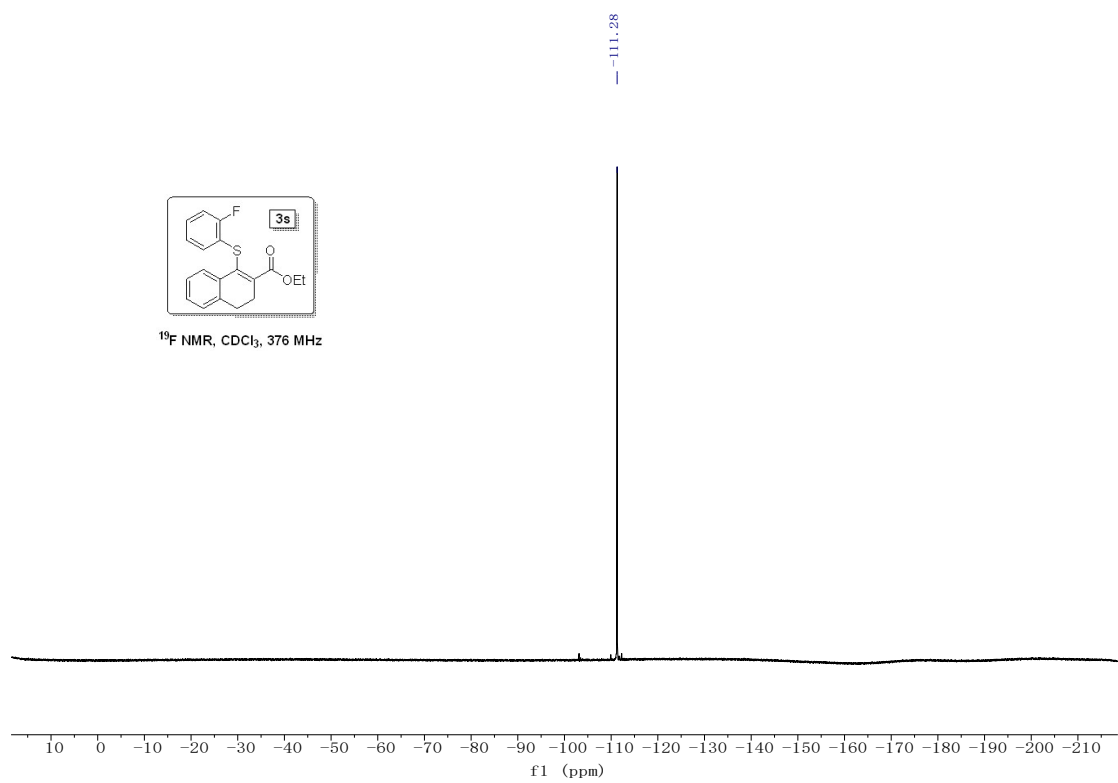

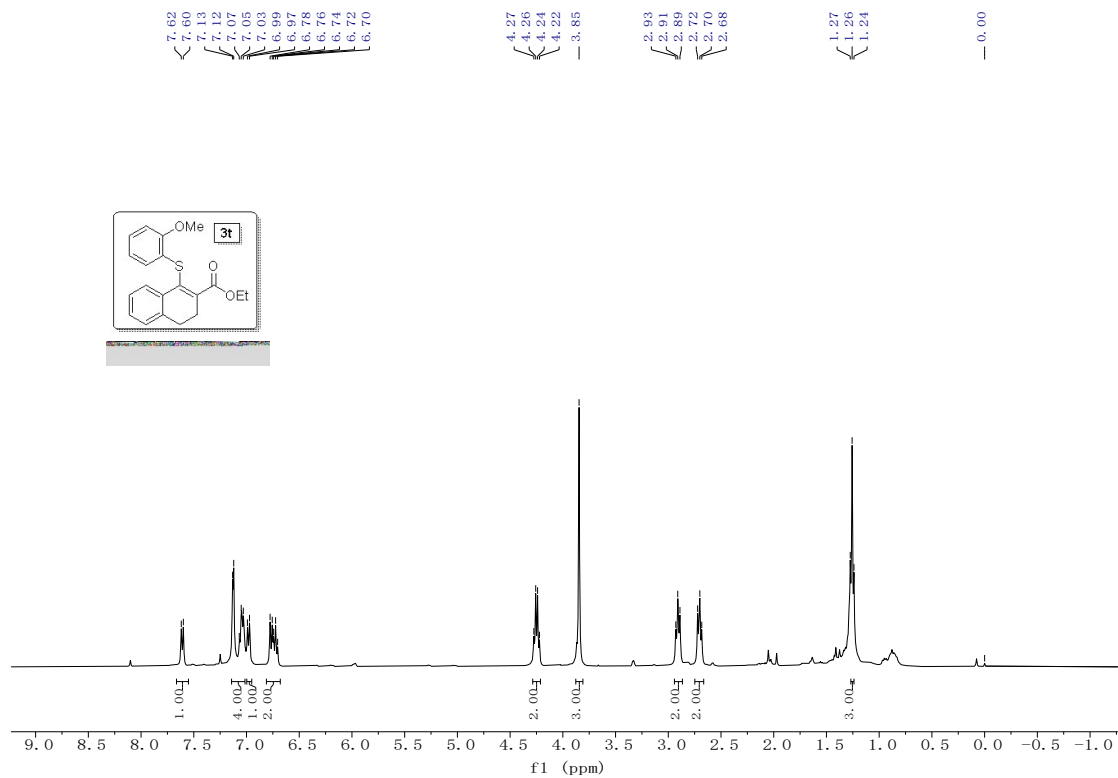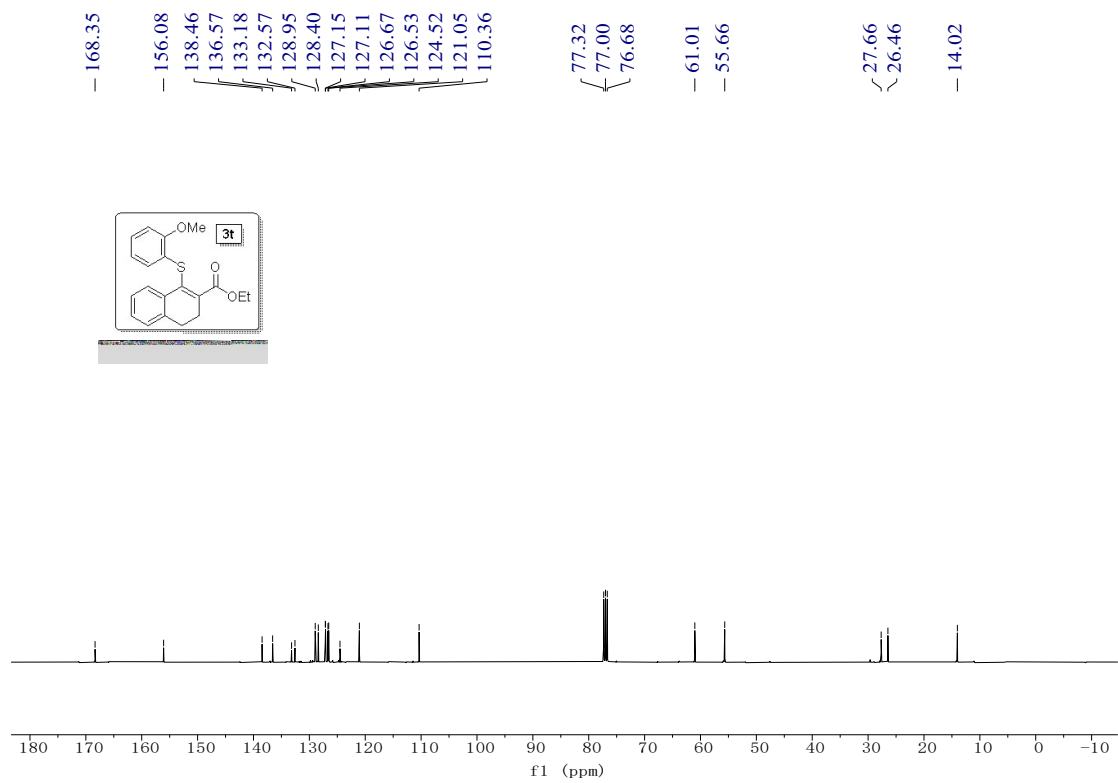

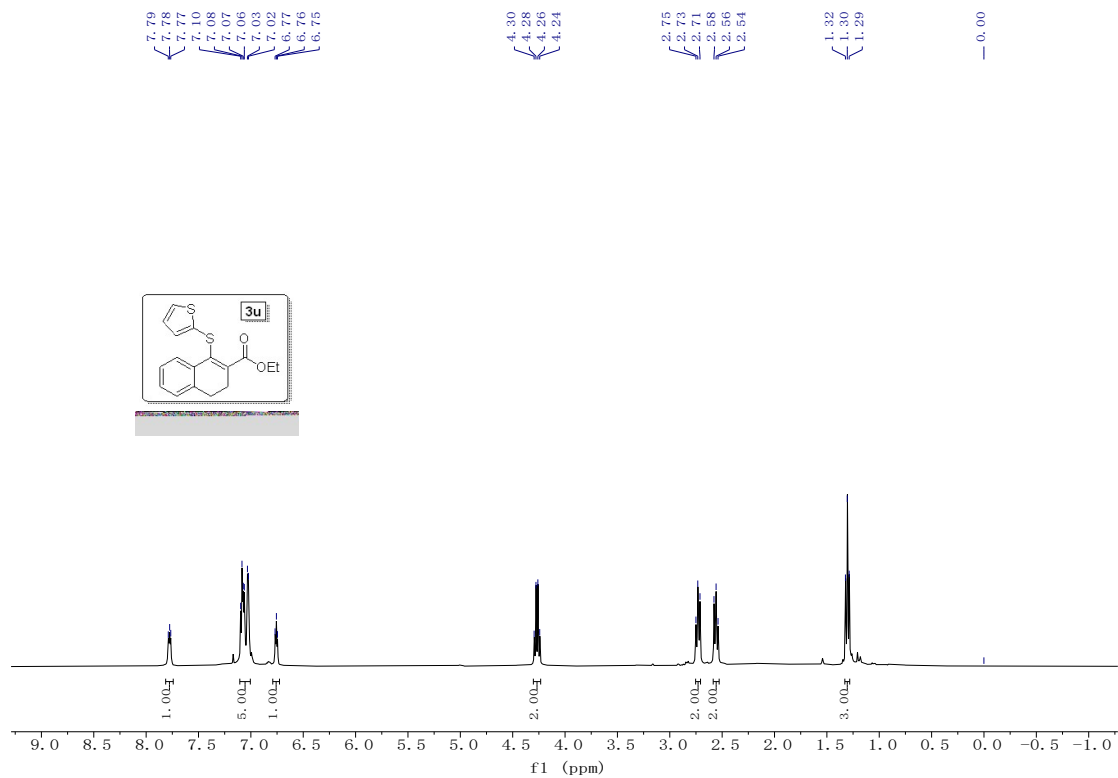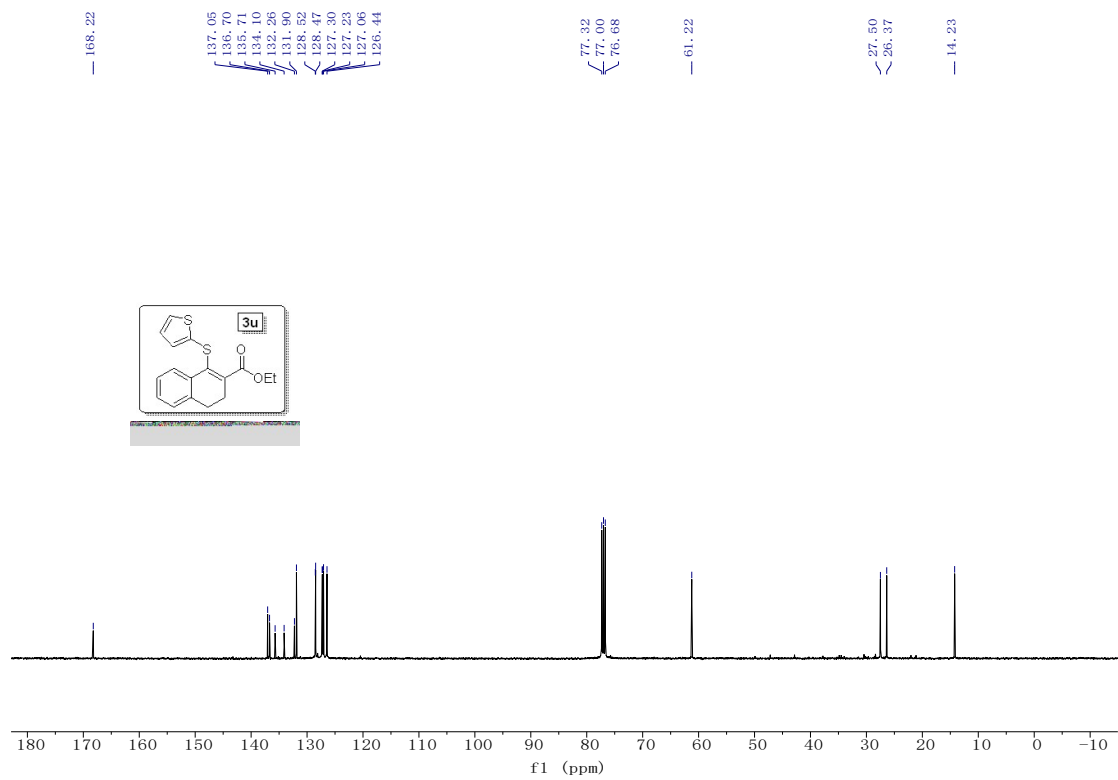

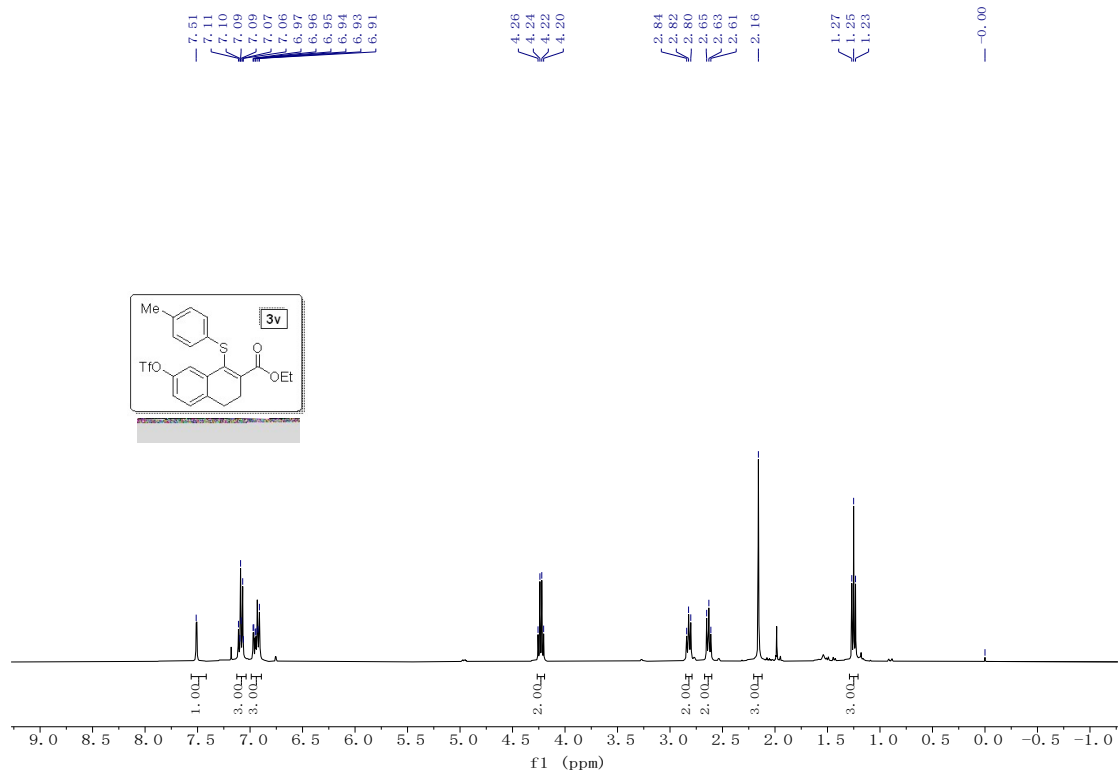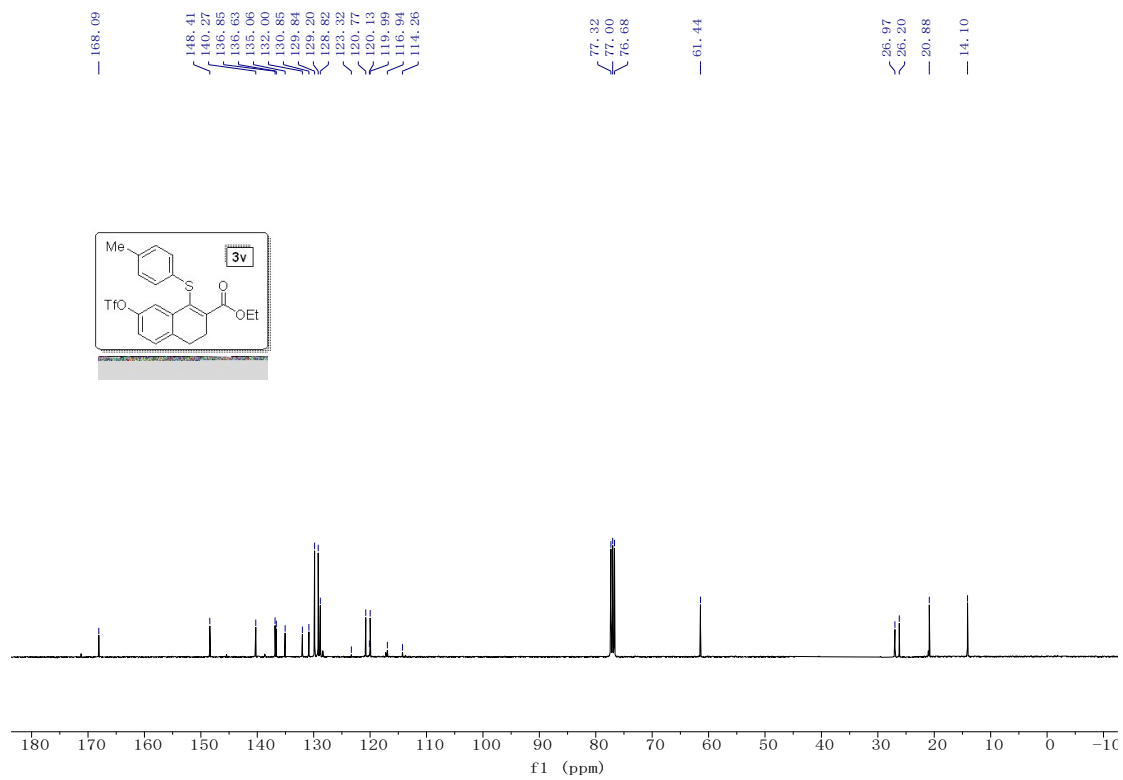



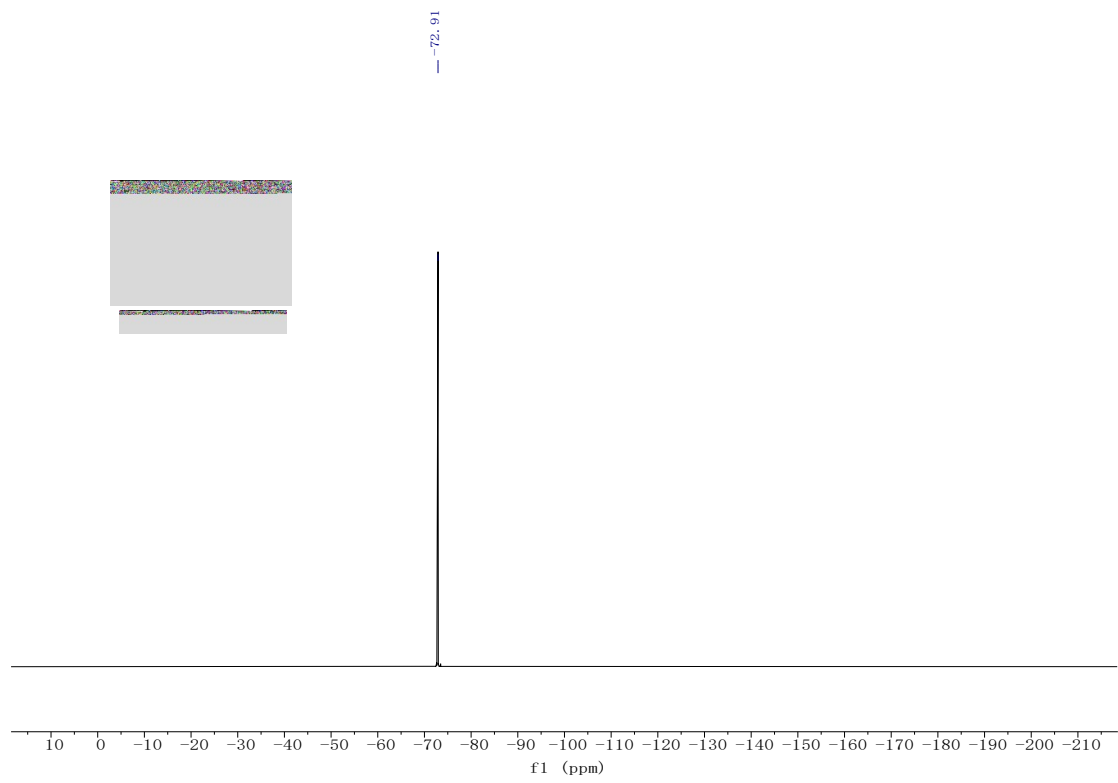

7.83  
 7.25  
 7.23  
 7.17  
 7.15  
 7.01  
 6.99  
 6.97

4.30  
 4.29  
 4.27  
 4.25

2.84  
 2.82  
 2.80  
 2.69  
 2.67  
 2.65  
 2.24

1.32  
 1.30  
 1.29

0.00

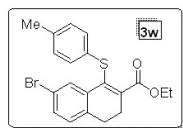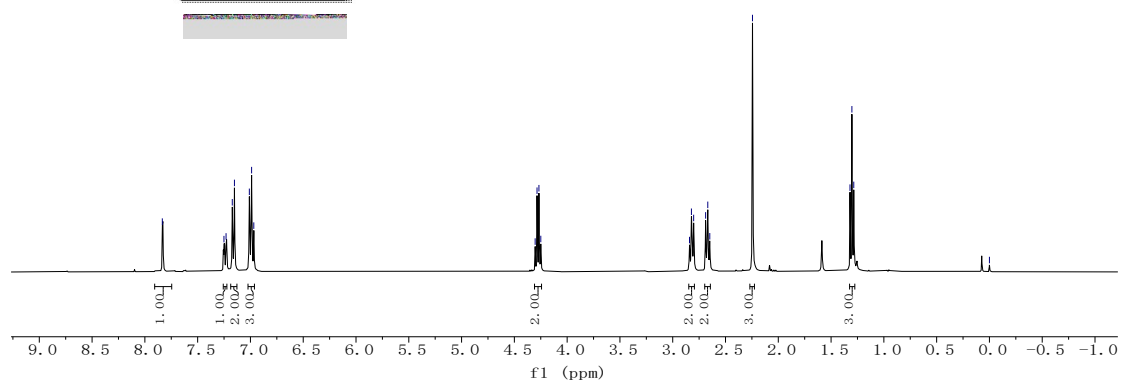

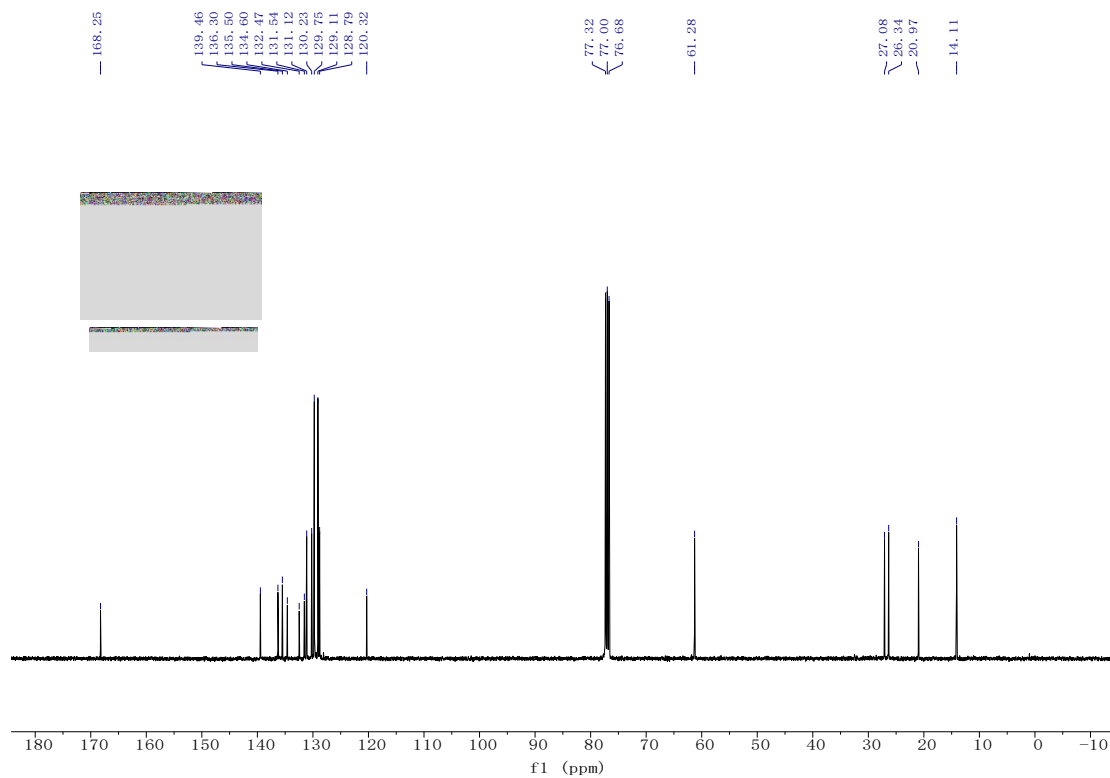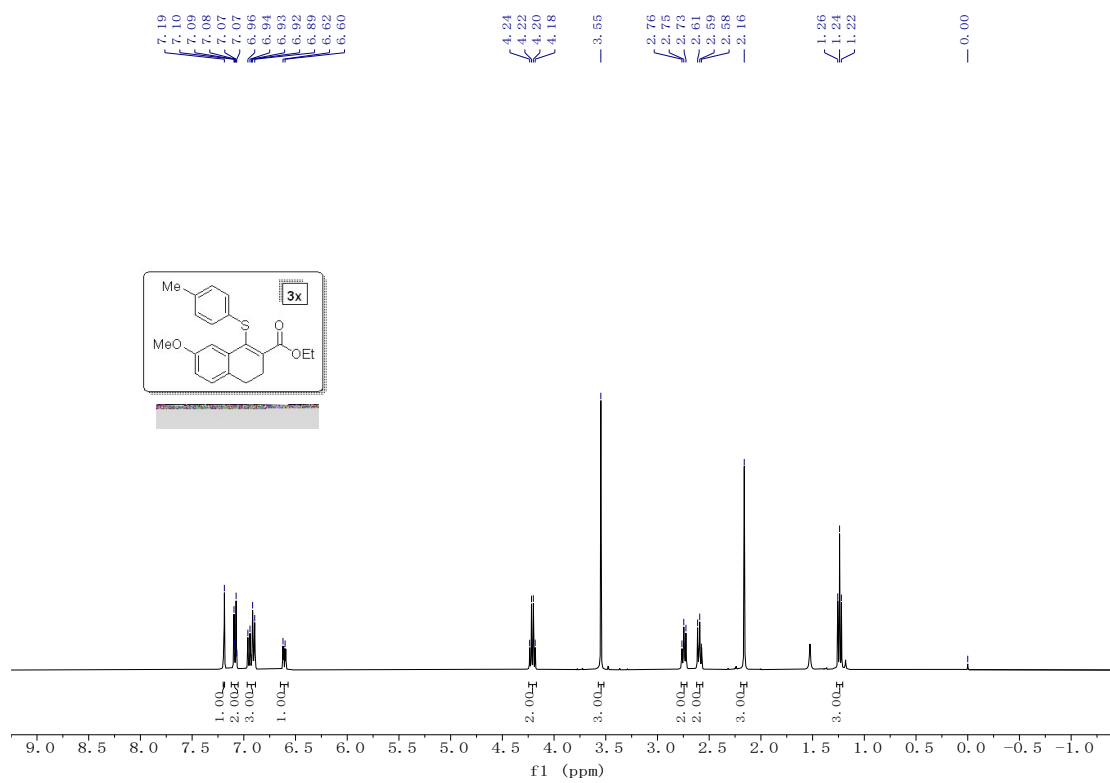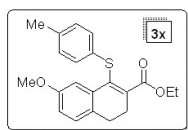

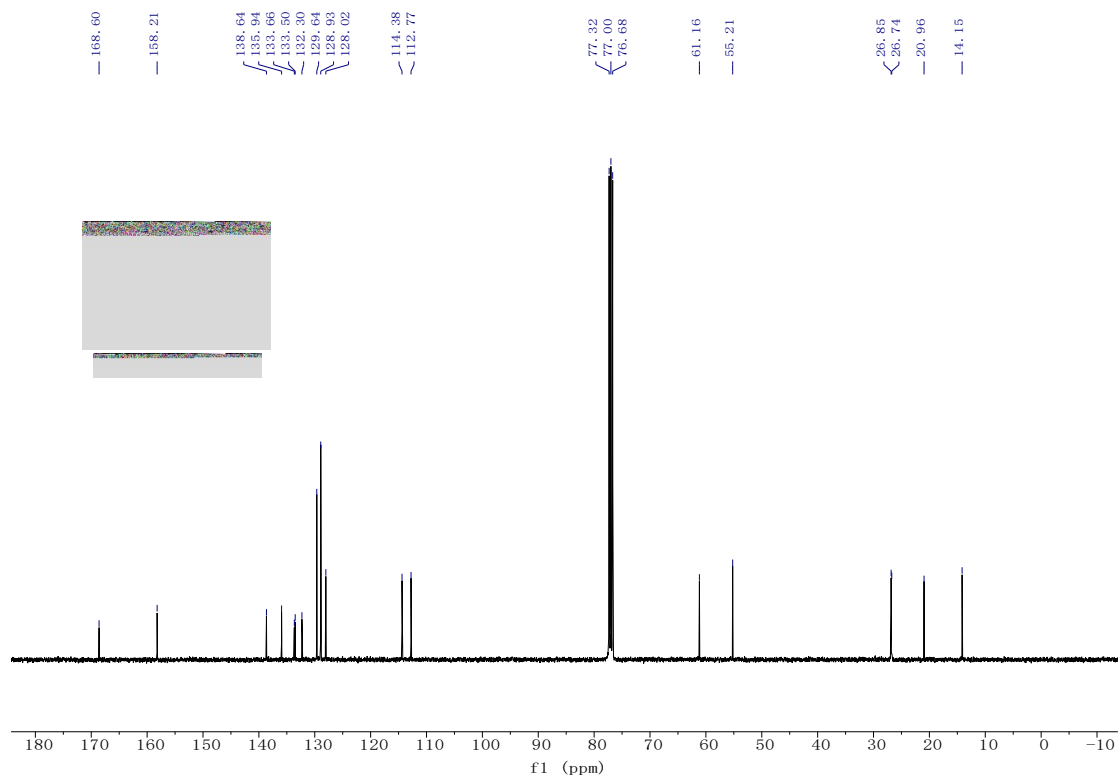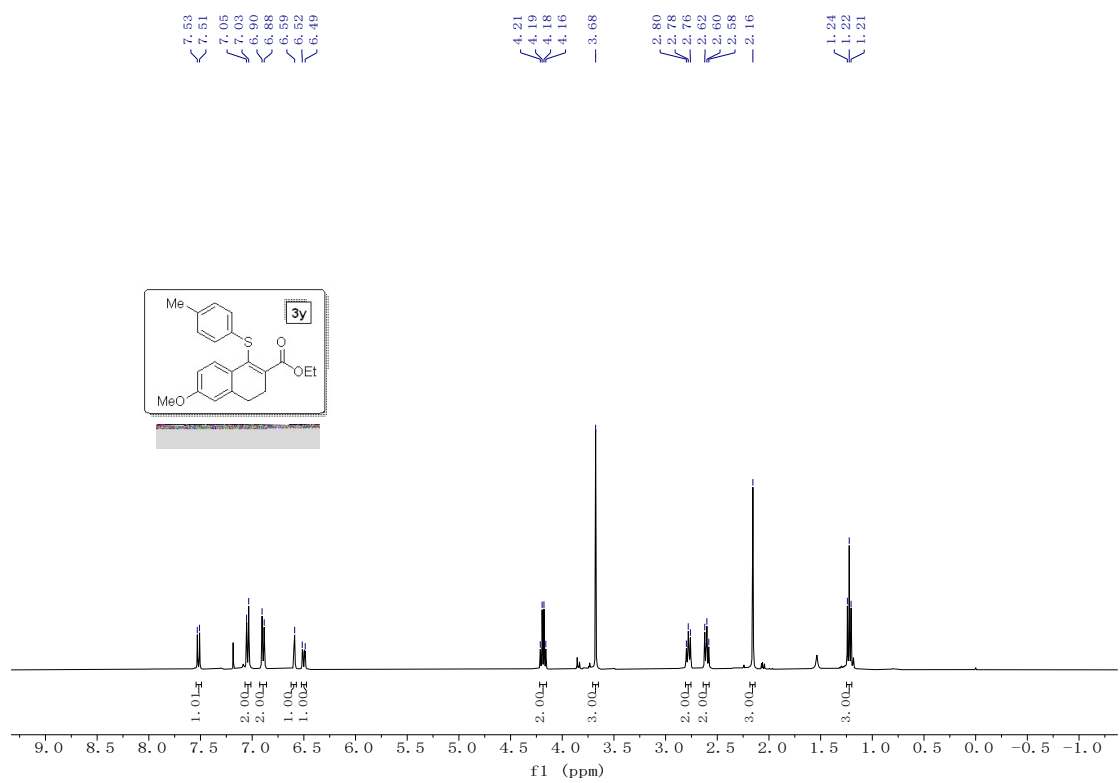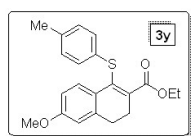

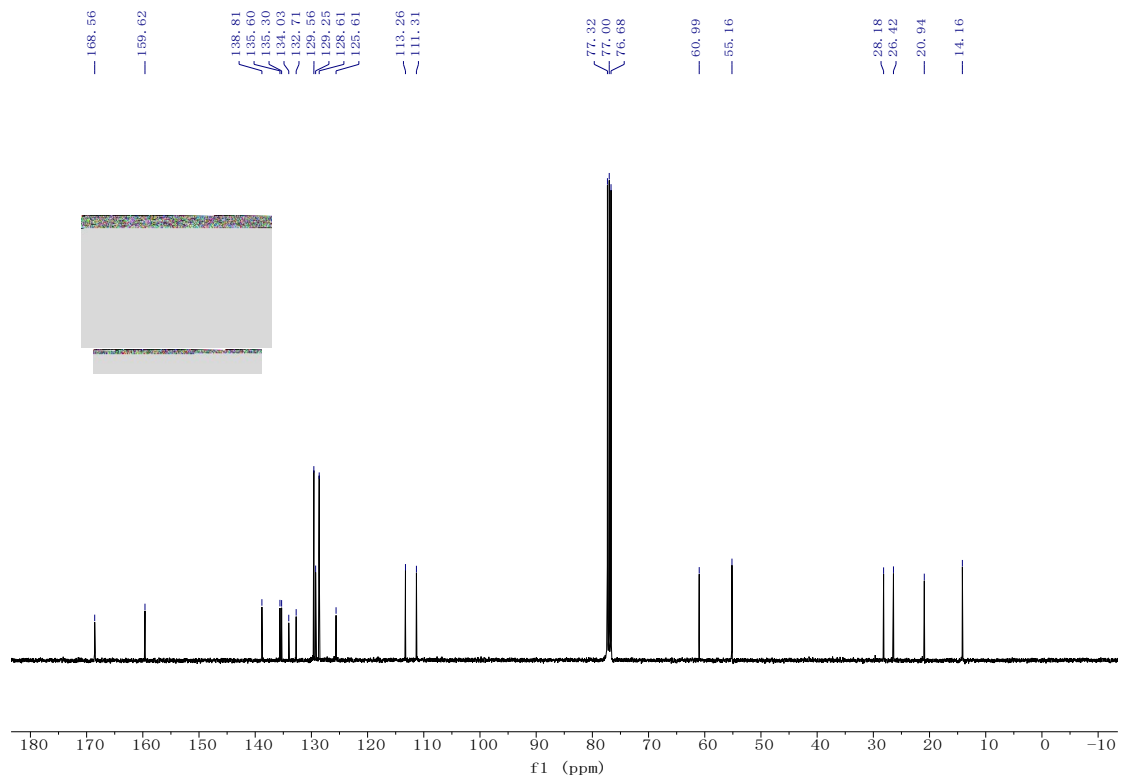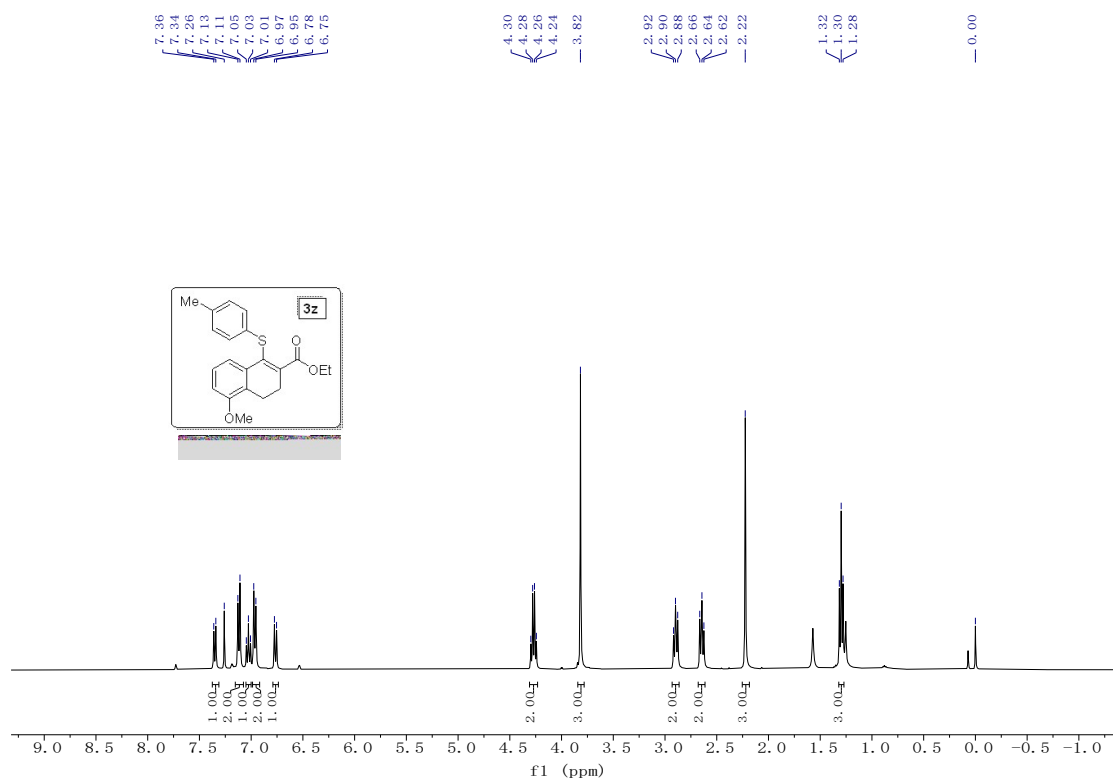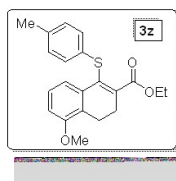

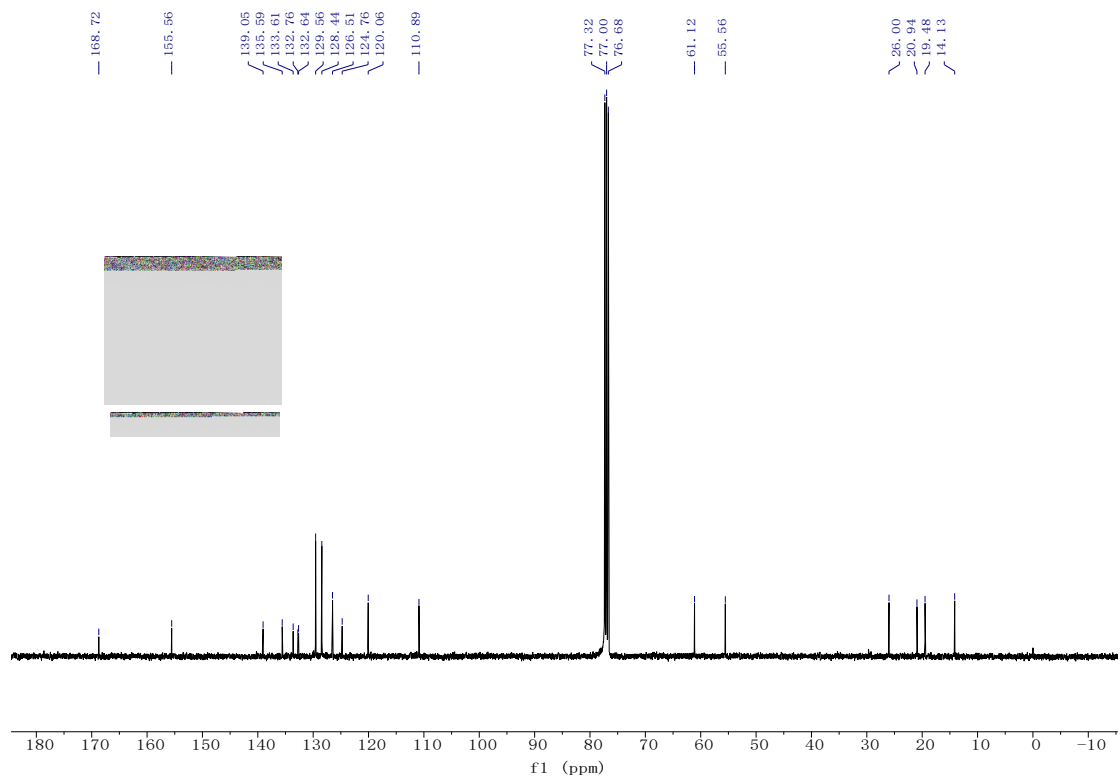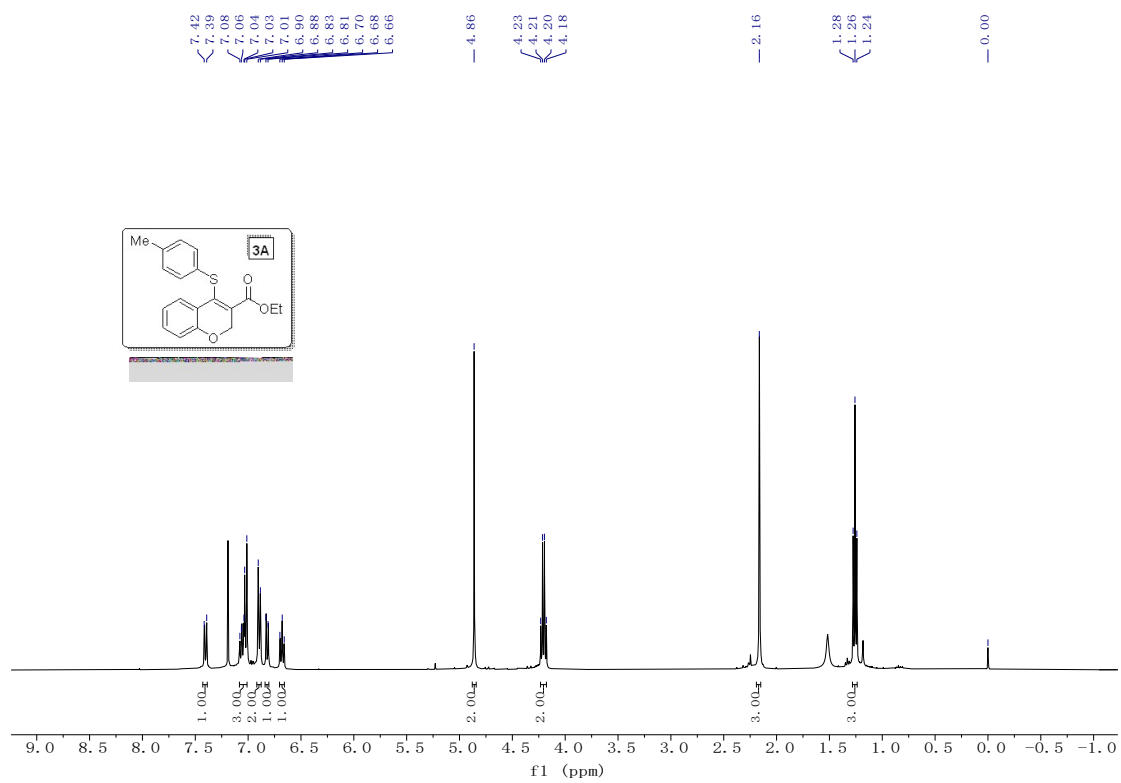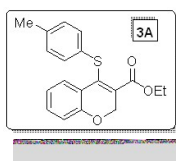

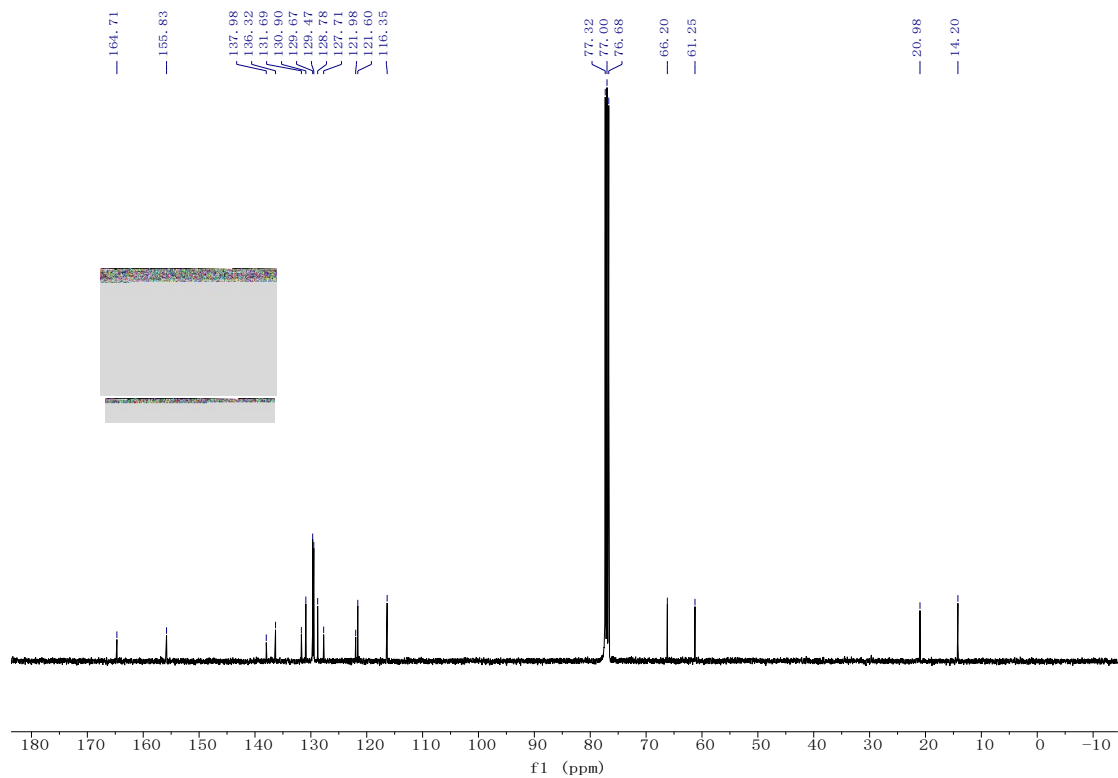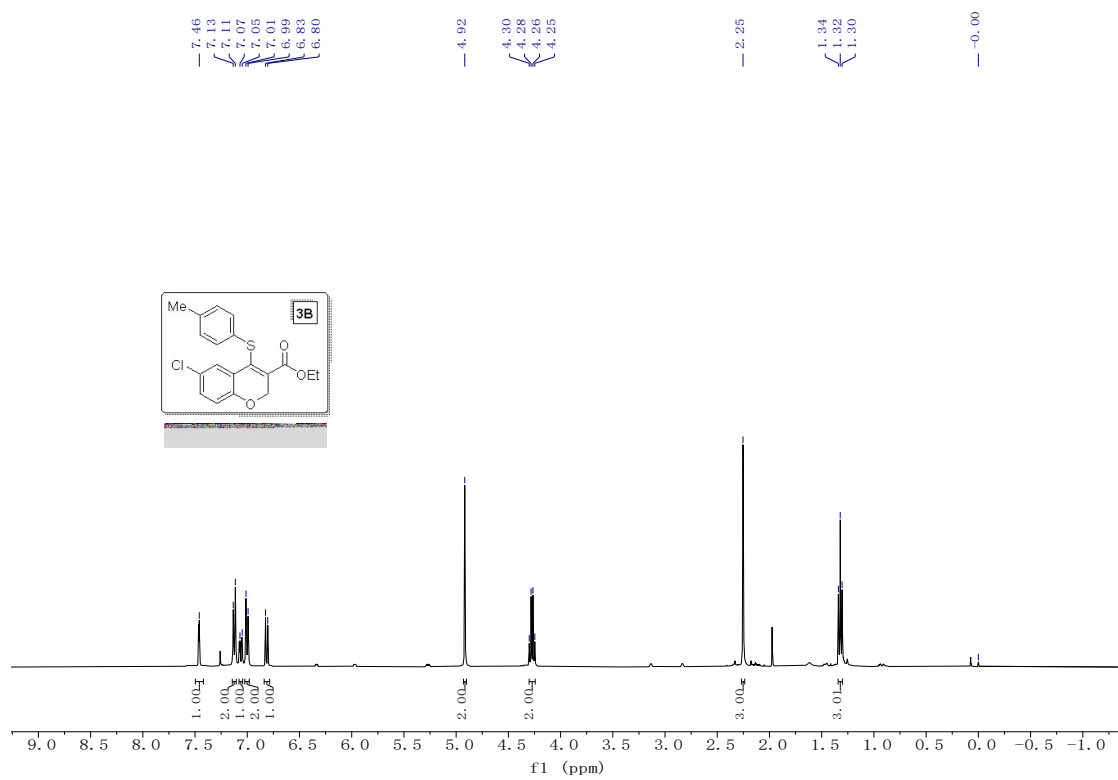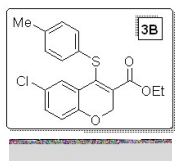

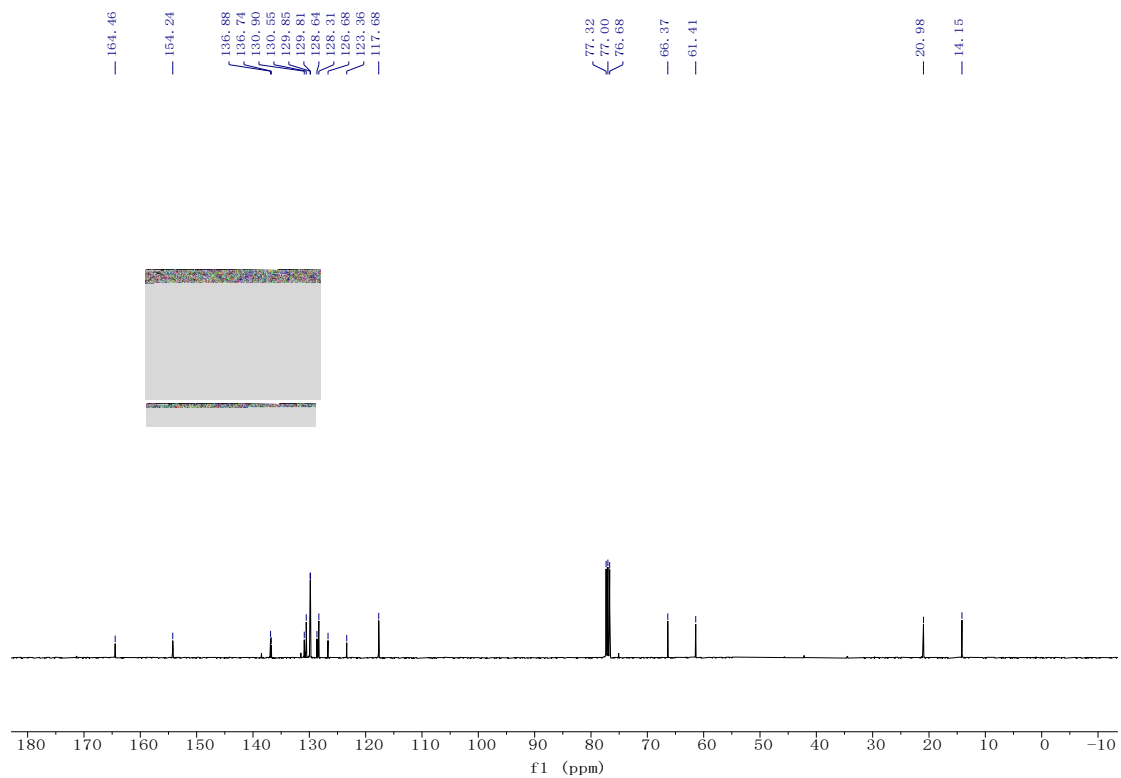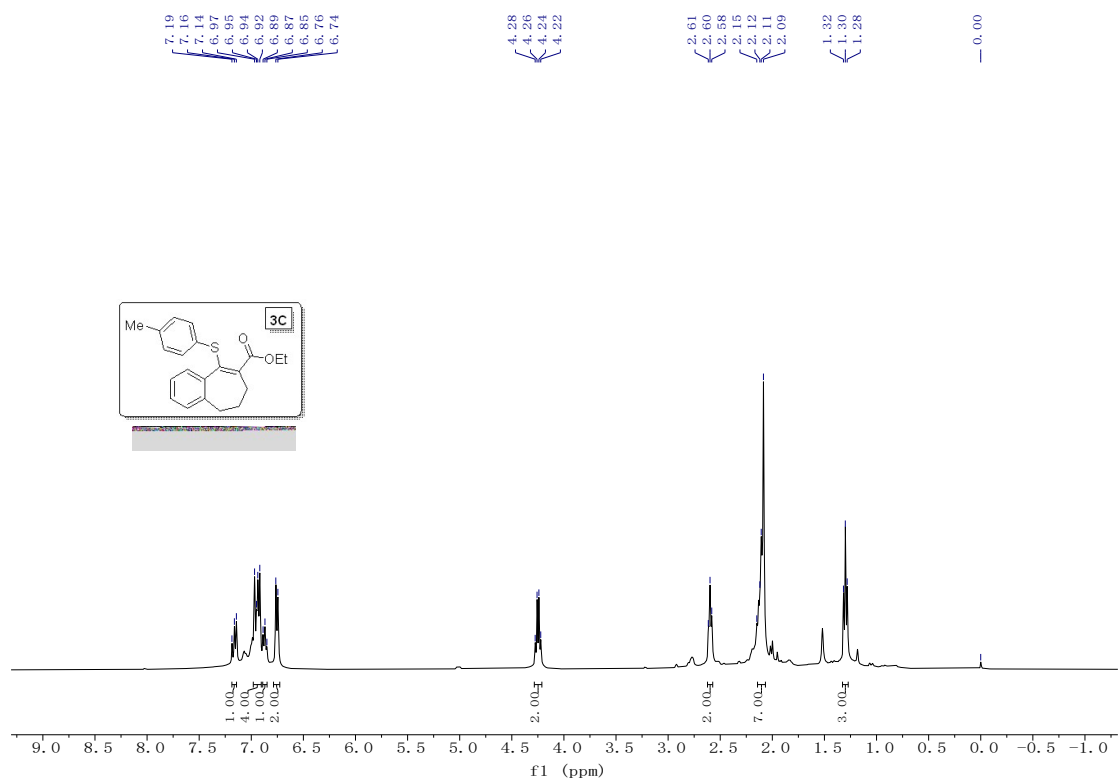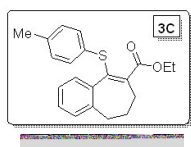

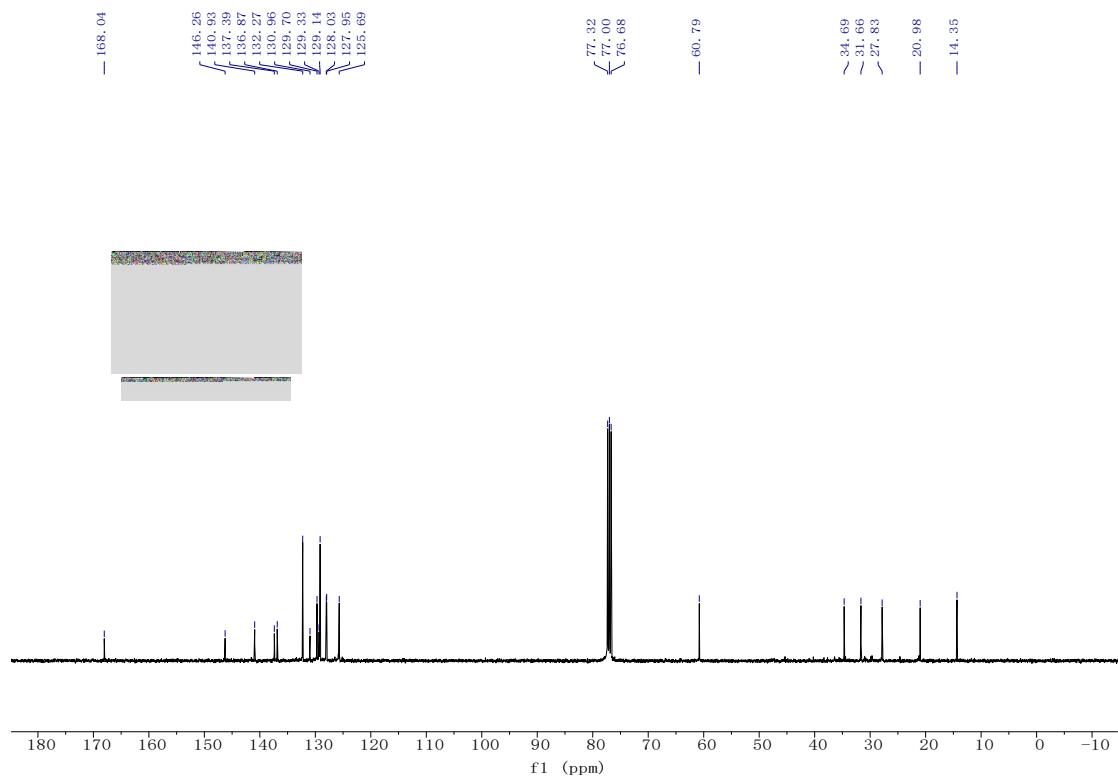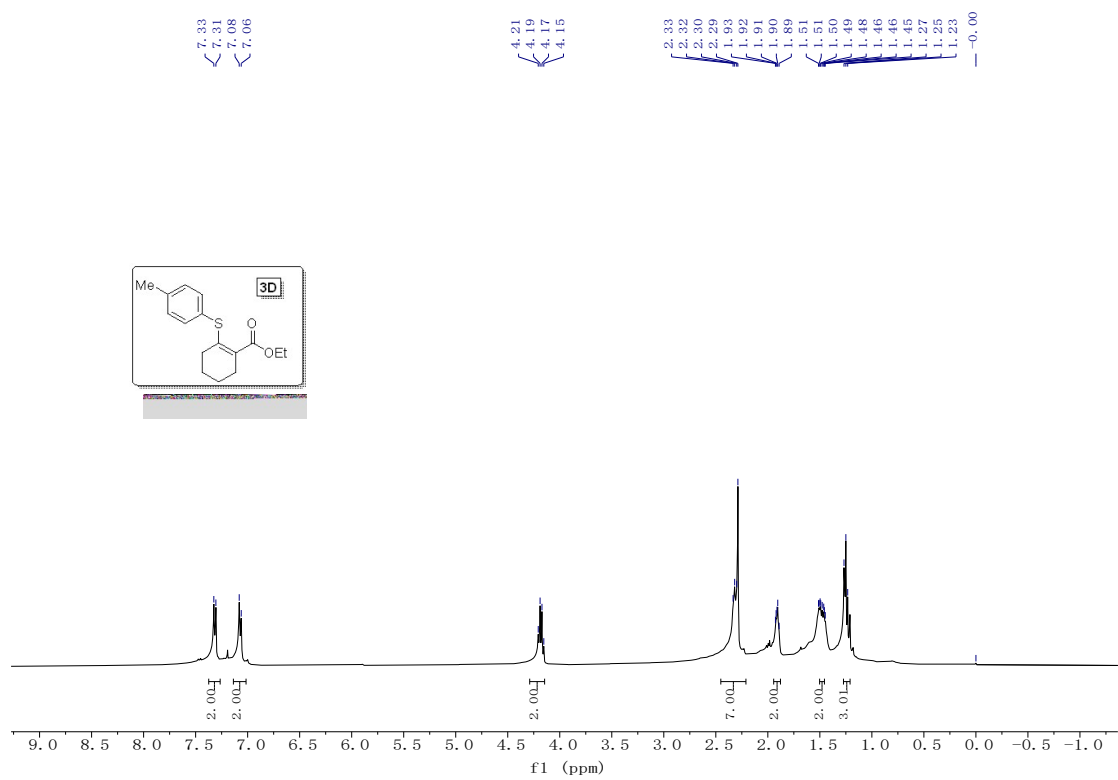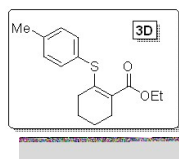



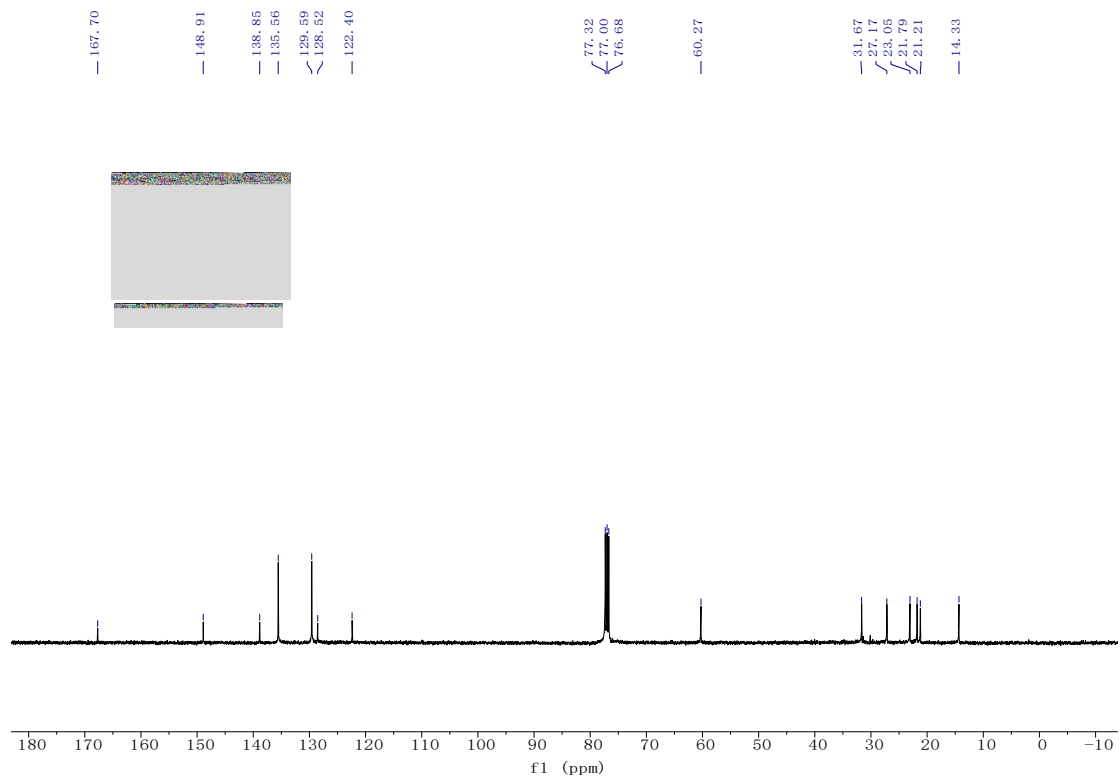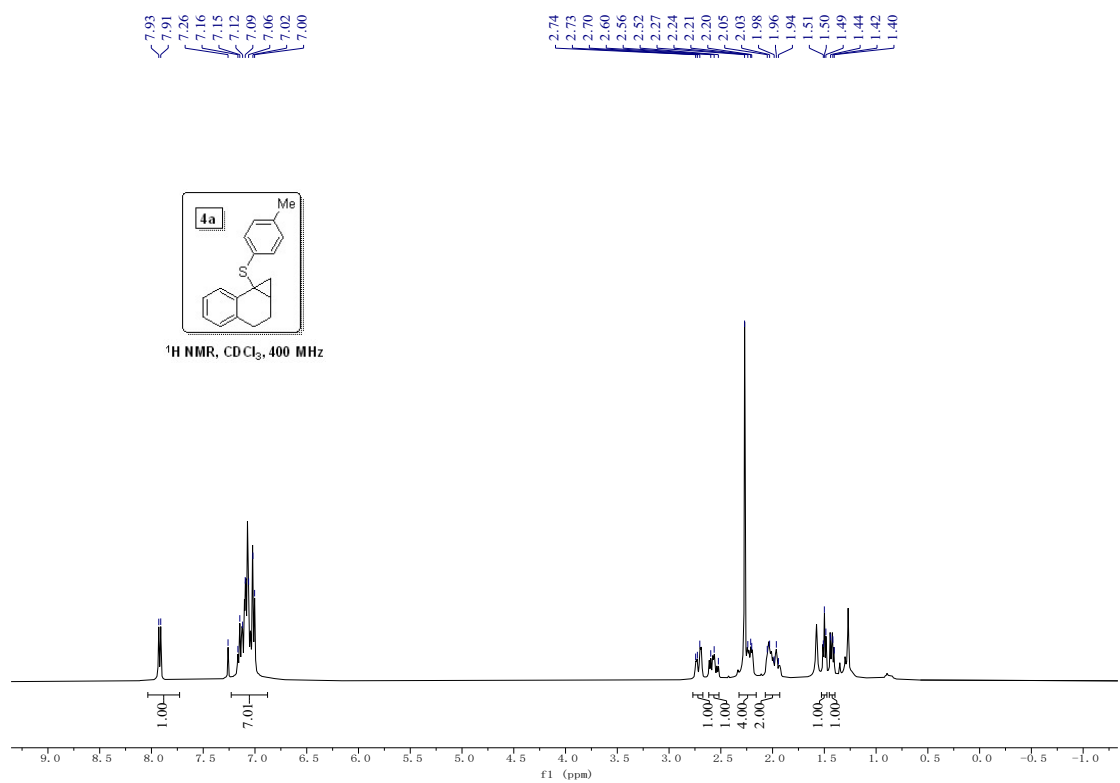

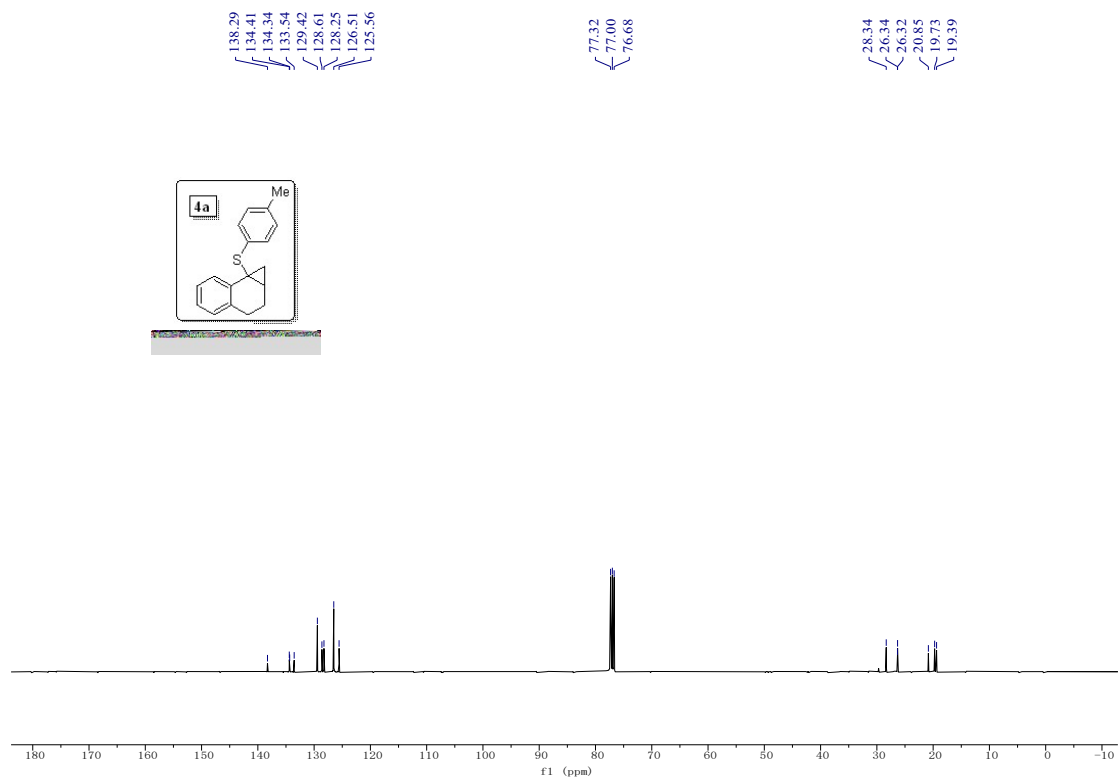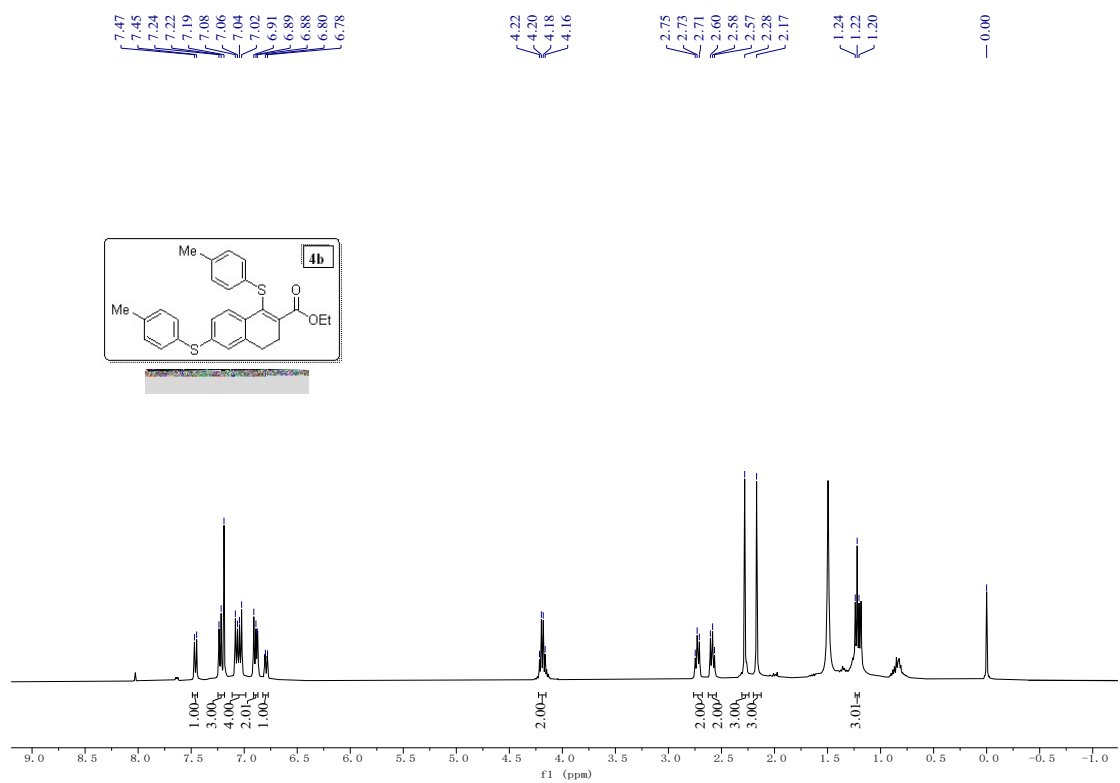

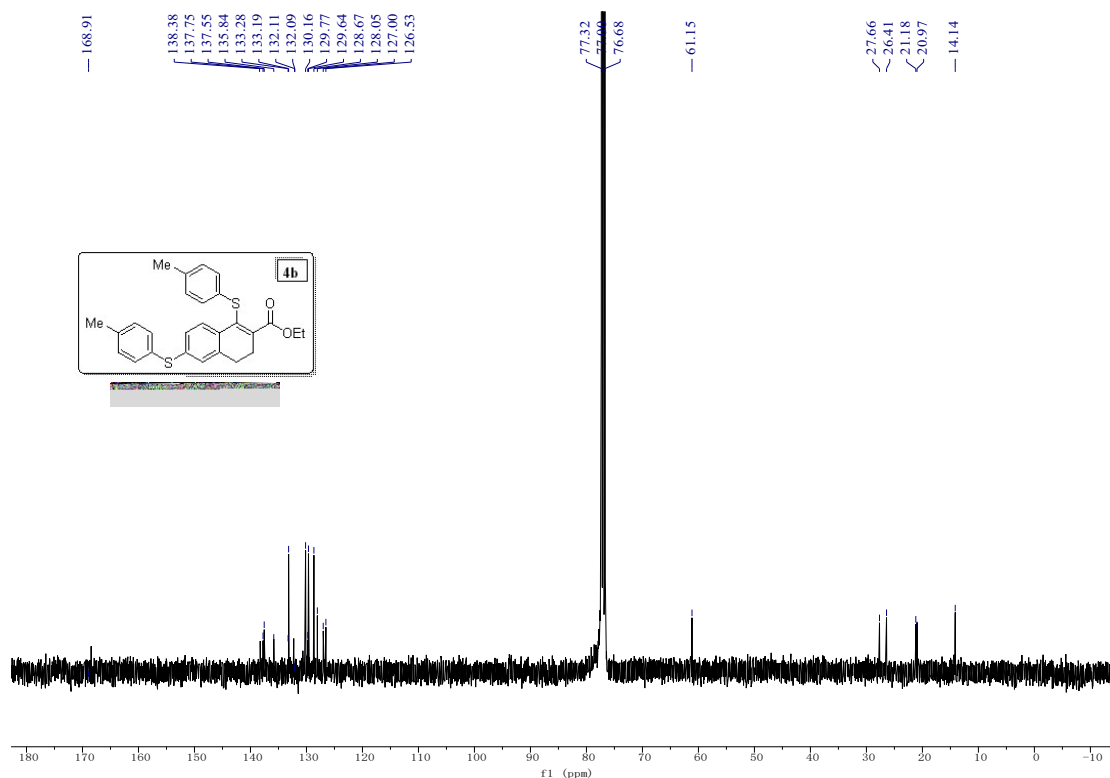

## 12. References

- [1] R. Oechsner, I. Lindenmaier and I. Fleischer, Nickel Catalyzed Cross-Coupling of Aryl and Alkenyl Triflates with Alkyl Thiols. *Org. Lett.*, 2023, **25**, 1655-1660.
- [2] X. Wu, J. Li, S. Xia, C. Zhu and J. Xie, Nickel-catalyzed Thioester Transfer Reaction with  $sp^2$ -Hybridized Electrophiles. *J. Org. Chem.*, 2022, **87**, 10003-10017.
- [3] G. Du, P. Zhu, J. Wang, X. Li, D.-P. Zhang, C.-Z. Wang and F.-G. Sun, Modular Synthesis of ortho-Thiolated Aryl Esters Enabled with Thiocarbonate through Catellani Strategy. *Eur. J. Org. Chem.*, 2023, **26**, e202201382.
- [4] M. Soleiman-Beigi and B. Movassagh, Convenient Route to Thiocarbonates from Alcohols, Thiols, and Triphosgene. *Synth. Commun.*, 2010, **40**, 3467-3471.
- [5] J. Wang, Z. Dong, C. Yang and G. Dong, Modular and Regioselective Synthesis of All-Carbon Tetrasubstituted Olefins Enabled by an Alkenyl Catellani Reaction. *Nat. Chem.*, 2019, **11**, 1106-1112.
- [6] W. Lambert, Y. Fang, S. Mahapatra, Z. Huang, C. am Ende and J. Fox, Installation

of Minimal Tetrazines through Silver-Mediated Liebeskind-Srogl Coupling with Arylboronic Acids, *J. Am. Chem. Soc.*, 2019, **141**, 17068-17074.

[7] P. Ghosh, B. Ganguly, E. Perl and S. Das, A Synthesis of Biaryl Ketones via the C-S Bond Cleavage of Thiol Ester by a Cu/Ag Salt, *Tetrahedron Lett.*, 2017, **58**, 2751-2756.
